# Supplementary material for: Inpatient satisfaction with nursing care in a backward region: a cross-sectional study from northwestern China
Source: PubMed Central journal article supplement — BMJ Open. 2020 Sep 9;10(9):e034196. doi: 10.1136/bmjopen-2019-034196 (PMC7482479; doi:10.1136/bmjopen-2019-034196), 2020-09-09
Supplement: bmjopen-2019-034196.draft_revisions.pdf [file bmjopen-2019-034196.draft_revisions.pdf]

# BMJ Open

BMJ Open is committed to open peer review. As part of this commitment we make the peer review history of every article we publish publicly available.

When an article is published we post the peer reviewers' comments and the authors' responses online. We also post the versions of the paper that were used during peer review. These are the versions that the peer review comments apply to.

The versions of the paper that follow are the versions that were submitted during the peer review process. They are not the versions of record or the final published versions. They should not be cited or distributed as the published version of this manuscript.

BMJ Open is an open access journal and the full, final, typeset and author-corrected version of record of the manuscript is available on our site with no access controls, subscription charges or pay-per-view fees (<http://bmjopen.bmj.com>).

If you have any questions on BMJ Open's open peer review process please email [info.bmjopen@bmj.com](mailto:info.bmjopen@bmj.com)

# BMJ Open

## Inpatients' satisfaction with nursing care at a tertiary hospital in Gansu, China: a cross-sectional study

|                               |                                                                                                                                                                                                                                                                                                                                                                                                |
|-------------------------------|------------------------------------------------------------------------------------------------------------------------------------------------------------------------------------------------------------------------------------------------------------------------------------------------------------------------------------------------------------------------------------------------|
| Journal:                      | <i>BMJ Open</i>                                                                                                                                                                                                                                                                                                                                                                                |
| Manuscript ID                 | bmjopen-2019-034196                                                                                                                                                                                                                                                                                                                                                                            |
| Article Type:                 | Original research                                                                                                                                                                                                                                                                                                                                                                              |
| Date Submitted by the Author: | 12-Sep-2019                                                                                                                                                                                                                                                                                                                                                                                    |
| Complete List of Authors:     | Zhang, J ; Gansu Provincial Hospital, Nursing Department<br>Yang, Limei; Gansu Provincial Hospital, In-Patient services Center<br>Wang, Xiaoying; Gansu Provincial Hospital, Anorectal Department<br>Dai, Jiao; Gansu Provincial Hospital, Nursing Department<br>Shan, Wenjing; Gansu Provincial Hospital, Nursing Department<br>Wang, Jiancheng; Gansu provincial Hospital, Elder Department; |
| Keywords:                     | EPIDEMIOLOGY, SOCIAL MEDICINE, STATISTICS & RESEARCH METHODS                                                                                                                                                                                                                                                                                                                                   |
|                               |                                                                                                                                                                                                                                                                                                                                                                                                |

SCHOLARONE™  
Manuscripts

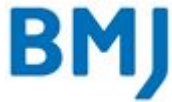

I, the Submitting Author has the right to grant and does grant on behalf of all authors of the Work (as defined in the below author licence), an exclusive licence and/or a non-exclusive licence for contributions from authors who are: i) UK Crown employees; ii) where BMJ has agreed a CC-BY licence shall apply, and/or iii) in accordance with the terms applicable for US Federal Government officers or employees acting as part of their official duties; on a worldwide, perpetual, irrevocable, royalty-free basis to BMJ Publishing Group Ltd ("BMJ") its licensees and where the relevant Journal is co-owned by BMJ to the co-owners of the Journal, to publish the Work in this journal and any other BMJ products and to exploit all rights, as set out in our [licence](#).

The Submitting Author accepts and understands that any supply made under these terms is made by BMJ to the Submitting Author unless you are acting as an employee on behalf of your employer or a postgraduate student of an affiliated institution which is paying any applicable article publishing charge ("APC") for Open Access articles. Where the Submitting Author wishes to make the Work available on an Open Access basis (and intends to pay the relevant APC), the terms of reuse of such Open Access shall be governed by a Creative Commons licence – details of these licences and which [Creative Commons](#) licence will apply to this Work are set out in our licence referred to above.

Other than as permitted in any relevant BMJ Author's Self Archiving Policies, I confirm this Work has not been accepted for publication elsewhere, is not being considered for publication elsewhere and does not duplicate material already published. I confirm all authors consent to publication of this Work and authorise the granting of this licence.

1  
2  
3  
4 **1 Inpatients' satisfaction with nursing care at a tertiary hospital in**  
5 **2 Gansu, China: a cross-sectional study**  
6

7 3 Zhang Juxia RN<sup>1</sup>, Yang Limei RN<sup>2</sup>, Wang XY RN<sup>3</sup>, Dai Jiao<sup>1</sup>, Shan Wenjing<sup>1</sup>, Wang Jiancheng  
8 4 Prof. PhD<sup>4\*</sup>  
9

10 5

11 6

12 7 1 Nursing Department, Gansu Provincial Hospital, Lanzhou, China

13 8 Email: juxia2008@hotmail.com

14 9 2 In-Patient services Center, Gansu Provincial Hospital, Lanzhou, China

15 10 Email: YangLM@163.com

16 11 3 Anorectal Department, Gansu Provincial Hospital, Lanzhou, China

17 12 Email: 27385673@qq.com

18 13 4 Elder Department, Gansu Provincial Hospital, Lanzhou, China

19 14 Email: 364954672@qq.com  
20  
21  
22  
23  
24  
25  
26  
27  
28  
29  
30  
31  
32

33 17 \*Corresponding author:

34 18 Wang Jiancheng, Prof. PhD. Elder Department, Gansu Provincial Hospital, Lanzhou, China

35 19 Email: 364954672@qq.com  
36  
37  
38  
39  
40  
41  
42  
43  
44  
45  
46  
47  
48  
49  
50  
51  
52  
53  
54  
55  
56  
57  
58  
59  
60

1  
2  
3 **29 Abstract**  
4

5  
6 **30 Objectives** The aim of the study was to examine the level of patient satisfaction with  
7  
8 nursing care and identify the factors affecting satisfaction from the in-patients'  
9  
10  
11 viewpoints.  
12

13 **33 Design** This was a cross-sectional study.  
14

15 **34 Setting** The study was conducted at a tertiary hospital located in the Northwest of  
16  
17 China.  
18

19  
20 **36 Participants** Patients who admitted in the wards for at least 48 hours were chosen to  
21  
22 attend the survey.  
23

24 **38 Primary outcome measure** The Newcastle Satisfaction with Nursing care Scale was  
25  
26 used. Data was analyzed using SPSS 21.0 software.  
27

28  
29 **40 Results** A total of 291 patients were involved. The overall inpatient satisfaction with  
30  
31 nursing care was 60.5% with the mean score  $78.15 \pm 4.74$ . Patients were more  
32  
33 satisfied with nurse who treatment them as an individual(67.7%) and respect their  
34  
35 privacy. Patients were least satisfied with the type of information nurses gave to  
36  
37 them(11.7%) and awareness of their needs. Patients who were older, married,  
38  
39 hospitalized, having a history of hospitalization, and in-charged by junior nurses had  
40  
41 higher satisfaction with nursing.  
42  
43

44  
45 **47 Conclusions** The overall level of patient satisfaction was moderate in this study.  
46  
47 Nursing administrators and clinical nurses should be more sensitive with the factors  
48  
49 affecting patients satisfaction with nursing care and to sufficiently meet patients'  
50  
51 expectations.  
52  
53

54  
55 **51 Keywords:** Inpatient, Nursing care, Tertiary hospital, China  
56  
57

58  
59 **52**  
60

1  
2  
3 **53 Strengths and limitations of this study**  
4  
5

6 ● This study is the first to evaluate inpatients' satisfaction with nursing care in less  
7 developed and heavier economic burden area in China.  
8  
9

10  
11 ● The questionnaire was completed only from Monday to Friday, and maybe some  
12 patients which could have better or worse satisfaction during the weekends were  
13  
14  
15  
16  
17  
18  
19  
20  
21  
22  
23  
24  
25  
26  
27  
28  
29  
30  
31  
32  
33  
34  
35  
36  
37  
38  
39  
40  
41  
42  
43  
44  
45  
46  
47  
48  
49  
50  
51  
52  
53  
54  
55  
56  
57  
58  
59  
60  
61  
62  
63  
64  
65  
66  
67  
68  
69  
70  
71  
72  
73  
74  
75  
76  
77

● It maybe that patient did not express their real feelings regarding nursing care  
fearing that the nurses would be against them, furthermore, qualitative interview  
is needed to explore individuals true thoughts.

## 78 **Background**

79 Patient satisfaction is defined by comparing the expectations that the individual has  
80 about the care they will receive and the real experience received, being understood as  
81 a positive result when care exceeds or meets expectations.<sup>1</sup> Based on this expectation,  
82 the evaluation of patient satisfaction objectively reflect the quality of health care  
83 services which becomes the golden standard and widely used metric to measure  
84 hospital quality management.<sup>2,3</sup>

85 Patient satisfaction with nursing services refers to patients' evaluation of nursing  
86 services<sup>4</sup> and allows identification of areas requiring improvement in nursing practice,  
87 thus guiding nursing planning, decision-making and result monitoring.<sup>1</sup> From the time  
88 of admission, nurses provide care for patients every day without fail until discharge,  
89 involve in almost every aspect of patients, therefore they comprise the majority of  
90 health care providers.<sup>4</sup> Thus, patient s' satisfaction regarding nursing service become  
91 an important indicator of the care quality.<sup>5,6</sup> More and more studies are taking  
92 globally to evaluate patients' satisfaction with nursing services so as to develop a  
93 system that meets patients' care needs. Studies in different countries revealed  
94 differences in patient satisfaction, for example, Ethiopia (52.75%),<sup>7</sup> Malaysia (47.5%)<sup>8</sup>  
95 and Pakistan (45% ),<sup>9</sup> while Lebanon (96.6%).<sup>10</sup> Anyway, these studies indicated that  
96 current nursing services could not fully satisfy patient needs.

97 In China, there are 20918 hospitals in different levels with 20 million registered  
98 nurses. The total bed to nurse ratio is 1:0,426. Of them, the 2232 tertiary public  
99 hospitals account for only 7.66% of the all-types health facilities yet provide nearly  
100 half(42.5%)of the inpatient care.<sup>11</sup> On average, one nurse per 1000 population which  
101 was lower than the WHO standard of 2.28 per 1000 population.<sup>12</sup> Excessive worklord  
102 leads to lower job satisfaction of nurse staff in tertiary hospitals than in other types of

1  
2  
3 103 health facilities.<sup>11,13</sup> Under such environment, the patients satisfaction in tertiary  
4  
5 104 hospitals needs more attention. Ministry of Health of China have formulated the "  
6  
7 105 Standards for Implementing Quality Nursing Services in Hospitals ( Trial )" in 2010  
8  
9 106 which aimed to provide patients with safe and high-quality nursing services.<sup>14</sup> With  
10  
11 107 these standards, " quality nursing service project" was carry out national wide. By  
12  
13 108 the end of 2015, all tertiary hospitals in China had carried out high-quality nursing  
14  
15 109 services, with 87.0 % of them were tertiary A-class hospitals and 82.6 % were B-  
16  
17 110 class.<sup>15</sup>

21 111 At present, the survey on the satisfaction of hospitalized patients with nursing  
22  
23 112 service in China is confusing. On one hand, patients in different facilities reported  
24  
25 113 high satisfaction about nursing service. A survey about patients satisfaction in 71  
26  
27 114 hospitals showed the patients satisfaction in 80% of the hospitals were more than  
28  
29 115 90%.<sup>16</sup>A study in some "secondary" A hospitals showed that 78% of patients were  
30  
31 116 satisfied.<sup>17</sup> This indicated that with the strengthening of high-quality care project,  
32  
33 117 Chinese nursing service continues to be improved. However, unfaithful reports of the  
34  
35 118 mass media and continuous occurrence of disputes and violence are inconsistent with  
36  
37 119 the results of the satisfaction survey. An analysis of workplace violence shows that  
38  
39 120 40.8% of hospital nurses in China have experienced different types of workplace  
40  
41 121 violence.<sup>18</sup> Zou et al study showed there is a high incidence(59.7 %) of workplace  
42  
43 122 violence among nurses in Chinese tertiary hospitals.<sup>19</sup> In Wang et al study 6.67% of  
44  
45 123 nurses suffered that.<sup>20</sup> Violence in these workplaces will affect nurses' mental health,  
46  
47 124 lead to job burnout,<sup>21</sup> and thus reduce the quality of nursing services.<sup>22</sup>

53 125 Thus, hospital-specific data are still needed to provide evidence for cross-country  
54  
55 126 and cross-cultural comparisons of satisfaction and factors affecting satisfaction using  
56  
57 127 standardized tools. Gansu province is located in north-west of China. Affected by  
58  
59  
60



1  
2  
3 128 region, the development of economy, culture and information is relatively backward  
4  
5 129 there. According to China's economic comprehensive competitiveness development  
6  
7 130 report, Gansu Province ranks 27th among the 31 provinces in China.<sup>22</sup> To our  
8  
9 131 knowledge, this is the first study in Gansu of China. This study has two aims: (1) to  
10  
11 132 assess patient satisfaction with nursing care and (2) to investigate the influence  
12  
13 133 factors affecting patient satisfaction with nursing care.  
14  
15  
16

## 17 134 **Methods**

### 18 135 **Study setting**

19  
20 136 This study was conducted at Gansu Provincial Hospital(GPH), a tertiary hospital with  
21  
22 137 1700-beds. The services at GPH include ear, nose and throat, surgery, outpatients  
23  
24 138 clinic, emergency, gynaecology and obstetrics, paediatrics and neonatal intensive care  
25  
26 139 unit, maternal and child health, physiotherapy, dental, radiology, traditional Chinese  
27  
28 140 medicine, rehabilitation, and internal medicine. GPH is also a teaching hospital for  
29  
30 141 nursing, health officer, medicine, midwifery and pharmacy undergraduate and  
31  
32 142 graduate students. The hospital has a total of 4070 healthcare employees whereas  
33  
34 143 1200 of them are nurses who providing health care in 60 nursing units. The average  
35  
36 144 outpatient per day were about 4500 with 250 of them were admitted to different wards.  
37  
38 145 The quality management department of the hospital conducts an annual patient  
39  
40 146 satisfaction survey that is based on merely five questions. These surveys do not use  
41  
42 147 the standard questionnaires nor include general characteristics of the patients and was  
43  
44 148 not subjected for further analysis and comparisons.  
45  
46  
47  
48  
49  
50

### 51 149 **Study design and sampling**

52  
53 150 This study was a cross-sectional survey. The sample of the study was determined  
54  
55 151 using simple stochastic sampling. The number of open beds in GPH is about 1500  
56  
57 152 after excluding departments such as paediatrics, intensive care units, emergency  
58  
59  
60

wards and VIP wards (about 200). The population of the study was calculated using the formula  $N = Z^2 \cdot P(1-P) / E^2$ .<sup>2</sup> In the formula, the symbols represent the following: a margin of error (E)= 5%. In order to narrow the interval, and make the estimation of effect quantity more accurate, we choose 99% as the confidence level, the  $Z=2.58$ . 90% patient satisfaction with nursing care.<sup>16</sup> We calculated the sample as the following:  $Z^2 \cdot P(1-P) / E^2 = (2.58^2 \cdot 0.90(1-0.90) / (0.05^2)) = 6.65 \cdot 0.09 / 0.0025 = 239$ . Then we add 20% to the sample size for non-response or for selection bias, thus the sample size would be = 288 approximately. Patients should meet the following inclusion criteria: (1)  $\geq 18$  years old; (2) admitted in the wards at least for 48h; (3) capable of independent communication with Chinese; (3) voluntary participation. Patients were excluded on any one of the following conditions: critical illness or cognitive impairment that affects judgement; inability to provide written informed consent. Medical, surgical, gynaecology and obstetrics and ear, nose and throat wards were purposefully selected and based on the calculated sample size, the required number of patients from each ward was proportionally allocated. The study started on August 2018. At the time of admission, each new patient to those wards was informed about the purpose of the survey and then lottery method is adopted to select randomly to consider if this patient took part in the study or not by nurse manager. Finally, the study sample consisted of 291 patients.

## **Instruments**

The questionnaire included: (1) general demographic characteristics: age, sex, occupational status, educational status, marital status, monthly family income, history of admission, hospital length of stay, admission ward, patients know the nurse in charge of his/her care. (2) the Newcastle Satisfaction with Nursing care Scale (NSNS) to measure satisfaction with nursing care. The NSNS was developed by Thomas et

1  
2  
3 178 al.<sup>23</sup> The Chinese version of the scale was tested for its validity and reliability by  
4  
5 179 Jiao.<sup>24</sup> The NSNS includes two subscales: the Experience of Nursing Care Scale  
6  
7 180 (ENCS) and the Satisfaction with Nursing Care Scale (SNCS). These two subscales  
8  
9 181 can be applied either together or separately. In this study, the SNCS was applied  
10  
11 182 which consists of a total of 19 items and using a 5-point Likert scale. For assessing  
12  
13 183 the degree of satisfaction, 'not at all', 'barely', 'satisfied', 'very', 'completely' scored  
14  
15 184 from 1- 5 respectively. Patient responses across all items are summed and transformed  
16  
17 185 to yield an overall satisfaction score of 0–95, which denotes complete satisfaction  
18  
19 186 with all aspects of nursing care.

### 187 **Patient and Public Involvement**

188 Verbal consent was obtained from each admitted patient during data collection. The  
189 respondents were told that participating in the study has no known risks rather benefit  
190 from the study since they have an opportunity to express their views for future quality  
191 nursing care improvements. The respondents also had given the right to refuse to take  
192 part in the study as well as to withdraw at any time during the study. No identifying  
193 information indicated on the questionnaires. None of the patients were involved in the  
194 recruitment to and conduct of the study?

### 195 **Institutional Review Board approval**

196 Consent were acquired from nurse director of each ward and verbal approvals were  
197 obtained from patients. This study was also approved by Gansu Provincial Hospital  
198 Research Ethics Committee.

### 199 **Data collection**

200 Five nursing students attended each ward from Monday to Friday to collect data. The  
201 students were trained previously regarding the content of the questionnaire and how to  
202 conduct the survey. The selected patients who had at least 2 days inpatient

203 experiences in each ward were approached by the students. A private room at the  
 204 hospital was used to interview patients. Family members were present during some of  
 205 the interviews at the request of some patients. If the patient cannot fill in the form due  
 206 to various factors, the researcher would ask and help to fill in the questionnaire. In  
 207 addition, medical records were reviewed for certain variables such as hospital length  
 208 of stay and history of admission. Till November of 2018, there were 291 patients  
 209 completed the survey.

## 210 Data analysis

211 The data were collected and analyzed with SPSS version 21.0. Patient satisfaction  
 212 with nursing service is described by mean, standard deviation, frequency and  
 213 percentage. Considering the study by Ahmed et al,<sup>7</sup> we used the same method to use  
 214 mean satisfaction score as a cut point to dichotomise satisfaction into ‘satisfied’ and  
 215 ‘not satisfied’. Binary logistics regression analysis and backward stepwise method  
 216 was used to screen variables which affect patient satisfaction. The strength of the  
 217 associations was described using ORs and 95% CI.

218 **Table 1** Sociodemographic characteristics and NSNS calculated score for example(N=291)

| Variables                   | Categories        | Frequency | NSNS score |
|-----------------------------|-------------------|-----------|------------|
|                             |                   | n(%)      | Mean (SD)  |
| Sex                         | Male              | 159(54.6) | 79.00±4.44 |
|                             | Female            | 132(45.4) | 77.12±4.85 |
| Monthly family income(CNY)* | <100              | 1(0.3)    | 78.0±0.35  |
|                             | <1000             | 17(5.7)   | 77.52±4.05 |
|                             | 1000-2999         | 103(34.6) | 85.0±0.05  |
|                             | 3000-4999         | 130(43.6) | 78.56±4.37 |
|                             | ≥5000             | 39(13.1)  | 77.0±6.45  |
|                             | ≥10000            | 1(0.3)    | 78.52±4.05 |
| Marital status              | Single            | 20(6.9)   | 78.5±2.35  |
|                             | Married           | 255(87.6) | 77.98±4.95 |
|                             | Others            | 16(5.5)   | 80.4±1.59  |
| Educational status          | Primary school    | 69(23.7)  | 78.27±4.01 |
|                             | High school       | 146(50.2) | 77.90±4.53 |
|                             | Advanced diploma  | 40(13.7)  | 77.82±6.15 |
|                             | Bachelor’s degree | 35(12.0)  | 79.11±4.96 |

|  |                                                   |                                       |           |            |
|--|---------------------------------------------------|---------------------------------------|-----------|------------|
|  |                                                   | Master degree                         | 1(0.3)    | 85.0±0.05  |
|  | Admission ward                                    | Medicine                              | 99(33.7)  | 78.62±4.93 |
|  |                                                   | Surgery                               | 78(26.5)  | 77.63±2.97 |
|  |                                                   | Obstetrics and gynecology             | 42(14.4)  | 74.5±5.5   |
|  |                                                   | Ophthalmology and otorhinolaryngology | 18(6.2)   | 79.77±3.13 |
|  |                                                   | Rehabilitation department             | 22(7.6)   | 80.86±5.13 |
|  | History of admission                              | Yes                                   | 146(50.2) | 78.76±4.57 |
|  |                                                   | No                                    | 145(49.8) | 77.53±4.82 |
|  | Patients know the nurse in charge of his/her care | Yes                                   | 221(75.9) | 78.47±4.65 |
|  |                                                   | No                                    | 70(24.1)  | 77.14±4.82 |
|  | Living area                                       | urban                                 | 146(50.2) | 77.98±4.08 |
|  |                                                   | rural                                 | 145(49.8) | 78.31±5.28 |
|  | Title of staff nurse                              | Junior RN                             | 177(61.7) | 79.15±4.25 |
|  |                                                   | Senior RN                             | 114(38.3) | 76.56±4.98 |

219 NSNS, Newcastle Satisfaction with Nursing Scale.\*USD1 is 7.4 Chinese Yuan (CNY).

## 220 Results

### 221 Patients' characteristics

222 Of the participant, the mean age is  $45.59 \pm 15.96$ . As seen in table 1, 54.6% were male,  
 223 87.6% were married and 23.7% were primary school graduates; 33.7% were  
 224 admitted in medical department, 43.6% monthly family income is 3000-4999  
 225 RMB(related to 436-726 USD). More than three-quarters (79%) of patients knew a  
 226 nurse in charge of their nursing care and more than half(61,7%) were cared by junior  
 227 registered nurses. Patients had the duration of the hospital stay varied between 2 and  
 228 36 days, with a mean of  $7.20 \pm 5.69$  days. The hospital length of stay of inpatients in  
 229 surgery ward (an average of 11 days) was longer than that for medical inpatients (an  
 230 average of 7 days).

### 231 Satisfaction with nursing care

232 As shown in Table 1, the average satisfaction score of patients is  $78.15 \pm 4.74$ .  
 233 Overall, 60.5% of the study participants were satisfied with the care provided by  
 234 nurses. Regarding nursing care, as shown in table 2, patients reported the highest  
 235 satisfaction when nurses treated them as an individual(67.7%) and respect their  
 236 privacy (60.8%). Patients were least satisfied with the type of information nurses gave  
 237 to them(11.7%) and awareness of patient's needs(9.6%).

238

239 **Table 2** Percentage distribution of items for satisfaction with nursing care in admitted patients at GPH.

| Item                                                                                    | Not at all satisfied<br>n (%) | Barely satisfied<br>n (%) | Quite satisfied<br>n (%) | Very satisfied<br>n (%) | Completely satisfied<br>n (%) |
|-----------------------------------------------------------------------------------------|-------------------------------|---------------------------|--------------------------|-------------------------|-------------------------------|
| 1.The amount of time nurses spent with patient                                          | 0                             | 4(1.4)                    | 42(14.4)                 | 179(61.5)               | 66(22.7)                      |
| 2.How capable nurses were at their job                                                  | 0                             | 1(0.3)                    | 16(5.5)                  | 156(53.6)               | 118(40.5)                     |
| 3.There always being a nurse around when needed                                         | 0                             | 2(0.7)                    | 58(19.9)                 | 164(56.4)               | 67(23.0)                      |
| 4.The amount nurses knew about patient care                                             | 0                             | 1(0.3)                    | 38(13.1)                 | 193(66.3)               | 59(20.3)                      |
| 5.How quickly nurses came when patient called them                                      | 0                             | 1(0.3)                    | 30(10.3)                 | 123(42.3)               | 137(47.1)                     |
| 6.The way the nurses made patient feel at home                                          | 0                             | 1(0.3)                    | 47(16.2)                 | 187(64.3)               | 56(19.2)                      |
| 7.The amount of information nurses gave to patient about their condition and treatment  | 0                             | 5(1.7)                    | 124(42.6)                | 102(35.1)               | 60(20.6)                      |
| 8.How often nurses checked to see if patients were well                                 | 0                             | 1(0.3)                    | 27(9.3)                  | 176(60.5)               | 87(29.9)                      |
| 9.Nurses' helpfulness                                                                   | 0                             | 1(0.3)                    | 26(8.9)                  | 192(66.0)               | 72(24.7)                      |
| 10.The way nurses explained things to patient                                           | 1(0.3)                        | 0                         | 29(10.0)                 | 166(57.0)               | 95(32.6)                      |
| 11.How nurses helped put patient relatives' or friends' minds at rest                   | 0                             | 0                         | 41(14.1)                 | 161(55.3)               | 89(30.6)                      |
| 12.Nurses' manner in going about their work                                             | 0                             | 0                         | 12(4.4)                  | 111(38.1)               | 167(57.4)                     |
| 13.The type of information nurses gave to patient about his/her condition and treatment | 0                             | 3(1.0)                    | 97(33.3)                 | 157(54)                 | 34(11.7)                      |
| 14.Nurses' treatment of patient as an individual                                        | 0                             | 1(0.3)                    | 14(4.8)                  | 78(26.8)                | 197(67.7)                     |
| 15.How nurses listened to patient worries and concerns                                  | 0                             | 1(0.3)                    | 55(18.9)                 | 196(67.4)               | 39(13.4)                      |
| 16.The amount of freedom patient was given on the ward                                  | 0                             | 0                         | 83(28.5)                 | 170(58.4)               | 38(13.1)                      |
| 17.How willing nurses were to respond to patient requests                               | 0                             | 2(0.7)                    | 51(17.5)                 | 177(60.8)               | 61(21)                        |
| 18.The amount of privacy nurses gave patient                                            | 0                             | 0                         | 36(12.4)                 | 78(26.8)                | 177(60.8)                     |
| 19.Nurses' awareness of patient needs                                                   | 0                             | 3(1.0)                    | 130(44.7)                | 130(44.7)               | 28(9.6)                       |

240

## 241 Factors influencing satisfaction

242 History of admission and surgery were significant factors influencing patient

243 satisfaction with nursing care. The higher level of patient satisfaction was found to be

244 significantly existed in patients married, with history of admission( $P<0.05$ ). Patients

245 admitted in medical wards showed the highest satisfaction comparing with those in

246 other wards. The score without surgery was higher than that with( $p=0.045$ , $OR=0.64$ ,

247  $95\% CI=0.38-1.07$ ). The higher the nurse's professional title, the lower the score. The

248 patient don't know the nurse in-charge has the lower score( $p=0.028$ , $OR=1.77$ , $95\%$

249  $CI=0.98-3.19$ )(Table 3).

250

251

252

253

254

**Table 3** Factors influencing patients' satisfaction with nursing care.

| Variables                             | Level of satisfaction                       |                                          | <i>P</i> | OR   | 95%CI      |
|---------------------------------------|---------------------------------------------|------------------------------------------|----------|------|------------|
|                                       | Satisfied<br>(score $\geq$ 78,176),<br>N(%) | Dissatisfied<br>(score <78,115),<br>N(%) |          |      |            |
| <b>Gender</b>                         |                                             |                                          | 0.002    | 1.16 | 0.61-2.19  |
| Male                                  | 105(59.66)                                  | 54(46.05)                                |          |      |            |
| Female                                | 71(40.34)                                   | 61(53.04)                                |          |      |            |
| <b>Marital status</b>                 |                                             |                                          | 0.011    | 0.25 | 0.10-0.67  |
| Single                                | 12(6.82)                                    | 8(6.96)                                  |          |      |            |
| Married                               | 158(89.77)                                  | 97(84.35)                                |          |      |            |
| Others                                | 16(9.09)                                    | 0                                        |          |      |            |
| <b>Admission ward</b>                 |                                             |                                          | 0.073    | 0.97 | 0.761-1.24 |
| Medicine                              | 69(39.20)                                   | 29(25.22)                                |          |      |            |
| Surgery                               | 41(23.29)                                   | 36(31.30)                                |          |      |            |
| Obstetrics and gynecology             | 11(6.25)                                    | 31(26.96)                                |          |      |            |
| Ophthalmology and otorhinolaryngology | 13(7.39)                                    | 5(4.35)                                  |          |      |            |
| Rehabilitation department             | 16(9.09)                                    | 6(5.22)                                  |          |      |            |
| <b>History of admission</b>           |                                             |                                          | 0.027    | 1.25 | 0.68-2.29  |
| Yes                                   | 95(53.98)                                   | 51(44.33)                                |          |      |            |
| No                                    | 81(46.02)                                   | 64(55.65)                                |          |      |            |
| <b>History of surgery</b>             |                                             |                                          | 0.045    | 0.64 | 0.38-1.07  |
| Yes                                   | 81(43.02)                                   | 66(57.39)                                |          |      |            |
| No                                    | 95(53.98)                                   | 49(42.61)                                |          |      |            |
| <b>Know the nurse in charge</b>       |                                             |                                          | 0.028    | 1.77 | 0.98-3.19  |
| Yes                                   | 140(79.55)                                  | 81(70.43)                                |          |      |            |
| No                                    | 36(20.45)                                   | 34(29.56)                                |          |      |            |
| <b>Title of nurse in charge</b>       |                                             |                                          | 0.001    | 2.39 | 1.41-4.03  |
| junior                                | 121(68.75)                                  | 56(48.69)                                |          |      |            |
| senior                                | 55(31.25)                                   | 59(51.30)                                |          |      |            |
| <b>Educational status</b>             |                                             |                                          | 0.471    | 0.87 | 0.59-1.27  |
| Primary school                        | 43(24.43)                                   | 26(22.61)                                |          |      |            |
| High school                           | 87(49.43)                                   | 59(51.30)                                |          |      |            |
| Advanced diploma                      | 22(12.50)                                   | 18(15.65)                                |          |      |            |
| Bachelor's degree                     | 23(13.07)                                   | 12(10.43)                                |          |      |            |
| Master degree                         | 1(0.57)                                     | 0                                        |          |      |            |

255

## 256 Discussion

257 In this study, our aim was to evaluate patients' satisfaction with hospital nursing care  
 258 and to explore the association between patients' characteristics and satisfaction. The  
 259 main finding is that patients were moderately satisfied with the care received, as

1  
2  
3 260 demonstrated by the mean score of 78.15 on the NSNS scale with the overall  
4  
5 261 satisfaction of 60.5%. This is higher than the results obtained in Taiwan(35%),<sup>25</sup>  
6  
7 262 Ethiopia(49.2%),<sup>26</sup> however, it is lower than that in Lebanon,<sup>10</sup> Beijing, China,<sup>27</sup>  
8  
9 263 Spain<sup>28</sup> and Australia.<sup>29</sup> This might be related to differences in sample size and region,  
10  
11 264 therefore, it is difficult to make absolute comparison of research results. However,  
12  
13 265 these results show that there are still many factors leading to dissatisfaction of patients  
14  
15 266 with hospital nursing services, and nursing managers need to analyze the reasons and  
16  
17 267 strengthen rectification. Patients' satisfaction with hospital care are significantly  
18  
19 268 associated with better patient safety, clinical effectiveness,<sup>30</sup> health outcomes<sup>31</sup> and  
20  
21 269 less medical resource utilization.<sup>32</sup> Therefore, nurses should be aware of the  
22  
23 270 importance of patients' satisfaction and its role.

24  
25  
26  
27  
28 271 Although overall patient satisfaction was moderate in this study, the findings  
29  
30 272 identified two problems which in need of improvement: (1) the type of information  
31  
32 273 gave to patients and (2) the awareness of patient needs. Patients' needs assessment is  
33  
34 274 important to define the target areas in which resources and efforts should be  
35  
36 275 concentrated.<sup>32</sup> However, the study indicated that nurses did not stress the importance  
37  
38 276 of patients care needs. It could be inferred from the research that, first of all, nurses  
39  
40 277 may not have enough knowledge reserves to fully answer patients' various questions.  
41  
42 278 Second, due to the heavy workload, more time is spent on completing doctor's orders  
43  
44 279 and other nursing and therapeutic work, and less time is spent on communicating with  
45  
46 280 patients and conducting health education. This may also result from the fact that in  
47  
48 281 most Chinese hospitals there are no nurse assistants whose task is mainly performance  
49  
50 282 of basic nursing activities such as bathing, oral toilet, changing, ect.<sup>33</sup> Nurse staff with  
51  
52 283 different layer need to perform all types of direct and indirect nursing activities in  
53  
54 284 China. Meanwhile, the nurse to patient ratio is one of the impressive nursing care  
55  
56  
57  
58  
59  
60



1  
2  
3 285 features whereas 0.42:1 in GPH, it was a increase in the number of patients each nurse  
4  
5 286 to provide more direct attention. With such workload, nurses were eager to educate  
6  
7 287 patients and therefore providing incomplete information or information that unmet  
8  
9 288 patients' needs.<sup>34</sup> The findings regarding low patient satisfaction scores related to  
10  
11 289 hospital staff responding to patient needs and information are consistent with the  
12  
13 290 outcomes of other studies.<sup>35,36</sup> Belayneh stated that patients were least satisfied with  
14  
15 291 the least given information by nurses.<sup>37</sup> Chan study showed patients communicated  
16  
17 292 with nurse and doctors about medicines and discharge information were more  
18  
19 293 satisfied with healthcare provider.<sup>38</sup> In various clinical settings, information is the  
20  
21 294 decisive factor for good patient experience.<sup>39</sup> Poor communication between health  
22  
23 295 care professionals and their patients is a key problem in the growing number of  
24  
25 296 complaints against health care professionals worldwide.<sup>40</sup> Therefore, investigating all  
26  
27 297 aspects of patients' needs and provide them with care and information to meet their  
28  
29 298 needs through communication plays an important role in patients' satisfaction.

30  
31  
32  
33  
34  
35  
36 299 Patient perception with service quality is a key indicator of hospital care,<sup>41</sup> which  
37  
38 300 also be one of the main determinants of patient's trust.<sup>42</sup> Therefore, a better  
39  
40 301 understanding of the factors affecting care quality can help hospital managers  
41  
42 302 implement effective plans to improve service quality.<sup>43</sup> In the current study, married  
43  
44 303 patients and those admitted to medical departments were more satisfied than others.  
45  
46 304 This finding was in cord with a study conducted at three public hospitals of Amhara  
47  
48 305 Region<sup>44</sup> which use NSNS scale, and in hospital in China<sup>24</sup> which used other scale to  
49  
50 306 assess patients satisfaction. This could be that unmarried patients pay more attention  
51  
52 307 to the impact of diseases on their future life. Therefore, they have relatively more  
53  
54 308 demand for healthcare knowledge, and engaging in treatment decision-making.  
55  
56 309 Patients admitted in medical wards are affected by chronic diseases, with relatively  
57  
58  
59  
60

1  
2  
3 310 frequent hospitalization, more opportunities to contact and communicate with nurses,  
4  
5 311 and more knowledge about the progress and outcome of their own diseases due to  
6  
7 312 long-term illness. These was also revealed in other study which showed patients  
8  
9 313 receiving chronic disease management reported high levels of enablement.<sup>29</sup> Stress  
10  
11 314 from surgery and postoperative recovery will have a significant impact on patient's  
12  
13 315 physiology and psychology. Prevalence of preoperative anxiety was range of 60–80%  
14  
15 316 in population,<sup>45</sup> these will lead to an increase in patient's demand for nursing services  
16  
17 317 and the expectation of the quality of nursing service. Any unmet of their expectations  
18  
19 318 during hospitalization will cause dissatisfaction. However, preoperative anxiety is  
20  
21 319 commonly neglected by clinicians.<sup>46</sup> Study has shown that patients be well-informed  
22  
23 320 and understand the process have a better surgical experience.<sup>28</sup> It is suggested that  
24  
25 321 patients need to be assessed regularly for anxiety during the preoperative visit and  
26  
27 322 appropriate anxiety reducing methods should be introduced. Nursing staff should  
28  
29 323 attach importance to nurse-patient communication through assess patients needs to  
30  
31 324 provide health related information and care services so as to meet patients needs and  
32  
33 325 to increase their satisfaction.

34  
35  
36  
37  
38  
39  
40  
41 326 Another aspect in this study is that patients with previous history of admission  
42  
43 327 were found to be more satisfied than their counter parts, similar result was found in  
44  
45 328 other study conducted in Ethiopia<sup>26</sup> and in China.<sup>24</sup> This could be related with patients  
46  
47 329 hospitalized for first time are unfamiliar with nursing staff and hospital environment.  
48  
49 330 They may have more requirements in communication with nurse regarding their  
50  
51 331 disease and nursing services. For patients with previous history of admission, they  
52  
53 332 have a certain understanding of their own diseases and health conditions, are familiar  
54  
55 333 with the hospital environment and the nurses in-charge, and have a stronger sense of  
56  
57 334 security than patients hospitalized for the first time. Study showed patients receiving  
58  
59  
60

1  
2  
3 335 continuity of care with the same nurse were more satisfied than those who not.<sup>29</sup> The  
4  
5 336 findings provide evidence for the value of nursing in nursing practice. Patients  
6  
7 337 require more individualized care from nurses regarding education, communication  
8  
9 338 and comfort<sup>2</sup> which will improves their well-being through reducing anxiety and  
10  
11 339 depression, and also indirectly, by building trust and social support.<sup>47</sup>  
12  
13

14 340 Patients need sympathy, which is one of many factors to improve the doctor-  
15  
16 341 patient relationship.<sup>48</sup> In the clinical environment, empathy includes the ability to  
17  
18 342 listen to patients, understand their views, sympathize with their experiences, express  
19  
20 343 understanding, respect and support. Lack of empathy will affect the effectiveness of  
21  
22 344 nursing. <sup>49</sup>Our findings show that nurses need to invest more time in patients-not only  
23  
24 345 in providing nursing skills, but also in realizing patients' empathy expectations. <sup>50</sup> Of  
25  
26 346 course, besides nursing, there are many factors that will affect the patient's  
27  
28 347 satisfaction, including patient staffing ratio, the use of health information technology,  
29  
30 348 the amount of surgery in the hospital and the health teaching situation.<sup>51</sup> Based on our  
31  
32 349 experience, we suggest to conduct interviews with patient as a first step to learn what  
33  
34 350 patients are most concerned with when seeking nursing services.  
35  
36  
37  
38  
39  
40

## 41 351 **Conclusion**

42  
43  
44 352 In conclusion, current study explored the level of patients satisfaction with nursing  
45  
46 353 services and its associated factors. It shows that the care needs of hospitalized patients  
47  
48 354 are still not satisfied to some extent. The current finding will have direct implication  
49  
50 355 towards nurse professionals and nursing administrators. Nurses should establish a  
51  
52 356 good relationship with patients through more communicational, and should pay  
53  
54 357 attention to the factors affecting patients' satisfaction with nursing care so as to  
55  
56 358 sufficiently meet patients' expectations.  
57  
58  
59  
60

1  
2  
3 **359 List of abbreviations**  
4  
5

6 **360** GPH: Gansu Provincial Hospital.  
7

8 **361** NSNS, Newcastle Satisfaction with Nursing Scale.  
9

10 **362**

11 **363 Declarations**  
12  
13  
14

15 **364 Ethics approval :** This study was approved by Gansu Provincial Hospital's Ethic  
16

17 **365** Commission.  
18  
19

20 **366 Consent for publication:** Not applicable.  
21  
22  
23

24 **367 Availability of data and material :** The datasets used and/or analysed during the  
25

26 **368** current study are available from the corresponding author on reasonable request.  
27  
28  
29

30 **369 Competing interests :** The authors declare that they have no competing interests  
31  
32  
33

34 **370 Funding:** This study is funded by Gansu provincial hospital fund(17GSSY1-5). The  
35  
36

37 **371** funding has no role in in the design of the study and collection, analysis, and  
38  
39

40 **372** interpretation of data and in writing the manuscript.  
41  
42  
43

44 **373 Authors' contributions :** YLM and WXY performed the survey. WJC analyzed and  
45  
46

47 **374** interpreted the patient data regarding satisfaction and effective factors. ZJX  
48

49 **375** performed the was a major contributor in writing the manuscript. DJ and SWJ  
50

51 **376** collected data. All authors read and approved the final manuscript.  
52  
53  
54

55 **377 Acknowledgements:** We thank staff nurse Gao JX and Wen YJ's supporting in the  
56

57 **378** questionnaire survey.  
58  
59  
60

379

380 **References**

- 381 1. Blank FSJ, Tobin J, Jaouen M, Smithline E, Tierney H, Visintainer P. A  
382 comparison of patient and nurse expectations regarding nursing care in the  
383 emergency department. *J Emerg Nurs*. 2013; 40(4):317-22.
- 384 2. Kol E, Arıkan F, İlaslan E, Akıncı MA, Koc MC. A quality indicator for the  
385 evaluation of nursing care: determination of patient satisfaction and related factors  
386 at a university hospital in the Mediterranean Region in Turkey. *Collegian*  
387 2018;25:51–56. <https://doi.org/10.1016/j.>
- 388 3. Al-Abri R, Al-Balushi A. Patient satisfaction survey as a tool towards quality  
389 improvement. *Oman Medical Journal* 2014; 29(1): 3–7.
- 390 4. Seeber R. The kind peace of mind culture" improves patient satisfaction. *Rehabil*  
391 *Nurs*. 2012; 37(6):286-91.
- 392 5. Davins J, Gens M, Pareja C, Guzmán R, Marquet R, Vallès R. El modelo de  
393 acreditación de atención primaria de Catalunya: un modelo válido. *Med Clin*  
394 (*Barc*) 2014; 143: 74–80. doi: 10.1016/j.medcli.2014.07.015.
- 395 6. ANCC. American Nurses Credentialing Center. Magnet Recognition Program  
396 Model, <https://www.nursingworld.org/organizational-programs/magnet/> (2017,  
397 accessed 17 February 2018).
- 398 7. Ahmed T, Assefa N, Demisie A, Kenay A. Levels of Adult Patients' Satisfaction  
399 with Nursing Care in Selected Public Hospitals in Ethiopia. *International Journal*  
400 *of Health Sciences* 2014;8(4):371-379.
- 401 8. Zun AB, Ibrahim MI, Hamid AA. Level of Satisfaction on Service Quality  
402 Dimensions Based on SERVQUAL Model Among Patients Attending 1 Malaysia  
403 Clinic in Kota Bharu, Malaysia. *Oman Med J*. 2018; 33(5): 416–  
404 422. doi: 10.5001/omj.2018.76.
- 405 9. Nazuk A, Shabbir J, Khan AH. A comparative survey for assessing Rashidabad  
406 city hospitals quality with District Headquarter Hospital. *J Pak Med*  
407 *Assoc*. 2018;68(7):1084-1089.

- 1  
2  
3 408 10. Hemadeh R, Hammoud R, Kdouh O, Jaber T, Ammar L. Patient satisfaction with  
4 primary healthcare services in Lebanon. *Int J Health Plann Manage*. 2018;26. doi:  
5 409 10.1002/hpm.2659.  
6 410  
7  
8 411 11. Duan M, Li D, Dong X. Analysis of job satisfaction among medical staff of public  
9 hospitals in Xingjiang. *J Xinjiang Med Univ*. 2015; 38: 635–637.  
10 412  
11 413 12. Ministry of Health (MoH). China Health Statistical Yearbook; Press of Peking  
12 Union Medical College: Beijing, China, 2017.  
13 414  
14 415 13. Wang S, Rui J, Ke X, Dai L, Xing H, Li Z. Job satisfaction survey among 580  
15 medical staff in public hospitals in a city. *Hei Long Jiang Med J*. 2015; 37: 510–  
16 416 514.  
17 417  
18 418 14. MoH. Ministry of Health Releases Quality Care Service Standards to Strengthen  
19 Hospital Clinical Care. [http://www.china.com.cn/policy/txt/2010-](http://www.china.com.cn/policy/txt/2010-12/23/content_21604283.htm)  
20 419 12/23/content\_21604283.htm.  
21 420  
22 421 15. The National Nursing Development Plan (2016-2020), National Health  
23 Commission of the People's Republic of China, 2016.  
24 422  
25 423 16. Guo YH, Jiao J, Zheng XJ, Liu HP. A survey of inpatient satisfaction with nursing  
26 care in 24 districts of China (Chinese). *Chinese Journal of Nursing* 2008, 43(4) :  
27 424 293-298.  
28 425  
29 426 17. Nie SM. Study on inpatient satisfaction with nursing and influencing factors in  
30 some second A hospitals (Chinese). Master thesis, Shandong University, 2014.  
31 427  
32 428 18. Fang PP, Ye Q, Li YX, Wang ZN, Miu Y, Xu HB. Analysis on Workplace Violence in  
33 Hospital from Nurses' Perspective and Countermeasure (Chinese).  
34 429 *Chinese Health Service Management* 2016; 33(4): 255-258.  
35 430  
36 431 19. Zou QH. Research on the Current Situation and Risk Factors of Workplace  
37 Violence of Nurses in Level C Hospitals - Taking 3 Level C Hospitals as  
38 432 Examples (Chinese). Beijing University of Chinese Medicine, Master thesis, 2018.  
39 433  
40 434 20. Wang C, Sun CH. Impacts of capability for work, mental health, and coping style  
41 of nurses on hospital workplace violence (Chinese). *Chinese Journal of Public*  
42 435 *health* 2015; 23(7): 941-945.  
43 436  
44 437 21. Zhang D, Lu D, Shi Y, Xie FZ, Wang JH, Xie YJ, Zhang SE, Sun T. Impact of Patients  
45 Violence in Public Hospital on Job Burnout of Nurses (Chinese). *Chinese Journal of*  
46 438 *Hospital Administration* 2016; 36(9): 69-71.  
47 439  
48  
49  
50  
51  
52  
53  
54  
55  
56  
57  
58  
59  
60

- 1  
2  
3 440 22.National Economic Ranking of Provinces in China, 2018. Beijing Youth  
4  
5 441 Daily.2019-02-11.http://www.sohu.com/a/307360333\_120060910.  
6  
7 442 23.Thomas LH, McColl E, Priest J, Bond S, Boys RJ. Newcastle satisfaction with  
8  
9 443 scales: an instrument for quality assessments of nursing care. *Quality in Health*  
10  
11 444 *Care*1996; 5(2): 67–72.  
12  
13 445 24.Jiao J. Inpatient satisfaction with nursing care and its influencing factors in 3-A-  
14  
15 446 Grade general hospitals in Beijing(Chinese). Beijing Xiehe Medical  
16  
17 447 University,thesis,2009.  
18  
19 448 25.Khan M, Hassan R, Anwar S, Babar TS. Patient Satisfaction with Nursing Care.  
20  
21 449 *Rawal Medical Journal* 2007; 32(1): 28-30.  
22  
23 450 26.Sharew NT, Bizuneh HT, Assefa HK, Habtewold TD. Investigating admitted  
24  
25 451 patients' satisfaction with nursing care at Debre Berhan Referral Hospital in  
26  
27 452 Ethiopia: a cross-sectional study. *BMJ Open* 2018;8(5):e021107. doi:  
28  
29 453 10.1136/bmjopen-2017-021107.  
30  
31 454 27.Jiang S.The Relationship between Face-to-Face and Online Patient-Provider  
32  
33 455 Communication: Examining the Moderating Roles of Patient Trust and Patient  
34  
35 456 Satisfaction. *Health Commun.* 2019; 1:1-9. doi: 10.1080/10410236.2018.1563030.  
36  
37 457 28.Sillero A, Zabalegui A. Satisfaction of surgical patients with perioperative nursing  
38  
39 458 care in a Spanish tertiary care hospital. *SAGE Open Med.* 2018; 6:  
40  
41 459 2050312118818304. doi: 10.1177/2050312118818304.  
42  
43 460 29.Desborough J,Phillips C,Banfield M,Bagheri N,Mills J. Impact of nursing care in  
44  
45 461 Australian general practice on the quality of care: A pilot of the Patient Enablement  
46  
47 462 and Satisfaction Survey (PESS). *Collegian*2015;22(2): 207-214.  
48  
49 463 <https://doi.org/10.1016/j.colegn.2014.10.003>.  
50  
51 464 30.Tsai TC, Orav EJ, Jha AK. Patient satisfaction and quality of surgical care in US  
52  
53 465 hospitals. *Ann Surg.* 2015; 261(1):2-8.  
54  
55 466 31.Doyle C, Lennox L, Bell D. A systematic review of evidence on the links  
56  
57 467 between patient experience and clinical safety and effectiveness. *BMJ Open* 2013;  
58  
59 468 3(1): e001570. doi: 10.1136/bmjopen-2012-001570.  
60  
61 469 32. Tobis S, Wiczorowska-Tobis K, Talarska D, Pawlaczyk M, Suwalska A. Needs  
62  
63 470 of older adults living in long-term care institutions: an observational study using  
64  
65 471 Camberwell Assessment of Need for the Elderly. *Clinical Interventions in Aging*  
66  
67 472 2018,13: 2389–2395. doi: 10.2147/CIA.S145937.

- 1  
2  
3 473 33.Nski MW, Ksykiewicz-Dorota A, Fidecki WB.Scope of Nursing Care in Polish  
4 474 Intensive Care Units. *BioMed Research International* 2013,4:1-9.  
5  
6 475 <http://dx.doi.org/10.1155/2013/463153>.  
7  
8 476 34.Adugbire1 A, Aziato L.Surgical patients' perspectives on nurses' education on  
9 477 post-operative care and follow up in Northern Ghana Bernard. *BMC Nursing* 2018;  
10 478 17:29. <https://doi.org/10.1186/s12912-018-0299-6>.  
11  
12 479 35.Lee TL, Crouse M, Gipson K.No-Pass Zone: Multidisciplinary Approach to  
13 480 Responding to Patient Needs. *J Nurs Care Qual.* 2016; 31(4):327-34. doi:  
14 481 10.1097/NCQ.000000000000179.  
15  
16 482 36.Milutinovic D, Simin D, Brkic N, Brkic S. The patient satisfaction with nursing  
17 483 care quality: the psychometric study of the Serbian version of PSNCQ  
18 484 questionnaire. *Scand J Caring Sci.*2012;26(3):598–606. doi: 10.1111/j.1471-  
19 485 6712.2012.00969.x.  
20  
21 486 37.Belayneh, M. Inpatient satisfaction and associated factors towards nursing care at  
22 487 Felegehiwot Referral Hospital. Northwest Ethiopia: Amhara Regional State.  
23 488 Retrieved October, 2016. from <http://www.gjmedph.com/uploads/O7-Vo5No3.pdf>.  
24  
25 489 38.Chan B, Goldman LE, Sarkar U, Schneidermann M, Kessell E, Guzman D,  
26 490 Critchfield J, Kushel M. The Effect of a Care Transition Intervention on the Patient  
27 491 Experience of Older Multi-Lingual Adults in the Safety Net: Results of a  
28 492 Randomized Controlled Trial. *J Gen Intern Med.* 2015; 30(12):1788-94. doi:  
29 493 10.1007/s11606-015-3362-y.  
30  
31 494 39.Patient Information Forum. Making the case for information: the evidence for  
32 495 investing in high quality information for patients and the public. Patient  
33 496 Information Forum, 2013. [https://www.pifonline.org.uk/wp-content/uploads/2013](https://www.pifonline.org.uk/wp-content/uploads/2013/05/PiF-full-report-FINAL-new.pdf)  
34 497 [/05/PiF-full-report-FINAL-new.pdf](https://www.pifonline.org.uk/wp-content/uploads/2013/05/PiF-full-report-FINAL-new.pdf). Accessed 21 July 2016.  
35  
36 498 40. Amutio-Kareaga A, García-Campayo J, Delgado LC, Hermosilla D, Martínez-  
37 499 Taboada C. Improving Communication between Physicians and Their Patients  
38 500 through Mindfulness and Compassion-Based Strategies: A Narrative Review. *J*  
39 501 *Clin Med.* 2017; 6(3): 33. doi: 10.3390/jcm6030033.  
40  
41 502 41.Baummer-Carr A, Nicolau DP. The challenges of patient satisfaction: influencing  
42 503 factors and the patient - provider relationship in the United States. *Expert Rev Anti*  
43 504 *Infect Ther.* 2017;15(10):955-962. doi: 10.1080/14787210.2017.1378097.  
44  
45  
46  
47  
48  
49  
50  
51  
52  
53  
54  
55  
56  
57  
58  
59  
60



- 1  
2  
3 505 42.Zarei E,Daneshkohan A, Khabiri R, Arab M. The Effect of Hospital Service  
4 506 Quality on Patient's Trust. *Iran Red Crescent Med J.* 2015; 17(1): e17505.DOI:  
5 507 10.5812/ircmj.17505.  
6  
7  
8 508 43. Liu Y, Aunguroch Y. Factors influencing nurse-assessed quality nursing care: A  
9 509 cross-sectional study in hospitals. *J Adv Nurs.* 2018;74(4):935-945. doi:  
10 510 10.1111/jan.13507.  
11  
12 511 44. Kasa AS, Gedamu H.Predictors of adult patient satisfaction with nursing care in  
13 512 public hospitals of Amhara region, Northwest Ethiopia. *BMC Health Serv Res.*  
14 513 2019; 19: 52.doi: 10.1186/s12913-019-3898-3.  
15  
16 514 45. Woldegerima Y.B.Fitwi G.L.Yimer H.T.Hailekiros A.G. Prevalence and factors  
17 515 associated with preoperative anxiety among elective surgical patients at University  
18 516 of Gondar Hospital. Gondar, Northwest Ethiopia, A cross-sectional study.  
19 517 *International Journal of Surgery Open* 2018;10: 21-29. [https://doi.org/10.1016](https://doi.org/10.1016/j.ijso.2017.11.001)  
20 518 [/j.ijso.2017.11.001](https://doi.org/10.1016/j.ijso.2017.11.001).  
21  
22 519 46.Pereira L, Figueiredo-Braga M, Carvalho IP. Preoperative anxiety in ambulatory  
23 520 surgery: The impact of an empathic patient-centered approach on psychological and  
24 521 clinical outcomes. *Patient Educ Couns.* 2016; 99(5):733-8. doi: 10.1016/j.pec.  
25 522 2015.11.016.  
26  
27 523 47.Greenhalgh J, Gooding K, Gibbons E, Dalkin S, Wright J, Valderas J, Black N.  
28 524 How do patient reported outcome measures (PROMs) support clinician-patient  
29 525 communication and patient care? A realist synthesis. *J Patient Rep*  
30 526 *Outcomes.*2018;2:42. doi: 10.1186/s41687-018-0061-6.  
31  
32 527 48. Chen AK, Kumar A, Haramati A. The effect of Mind Body Medicine course on  
33 528 medical student empathy: a pilot study. *Med Educ Online.* 2016; 21:31196.  
34  
35 529 49. Jubraj B, Barnett NL, Grimes L, Varia S, Chater A, Auyeung V.Why we should  
36 530 understand the patient experience: clinical empathy and medicines optimisation. *Int*  
37 531 *J Pharm Pract.* 2016;24(5):367-70. doi: 10.1111/ijpp.12268.  
38  
39 532 50.Bernardo MO, Cecilio-Fernandes D, Costa P, Quince TA, Costa MJ, Carvalho-  
40 533 Filho MA.Physicians' self-assessed empathy levels do not correlate with patients'  
41 534 assessments. *PLoS One* 2018; 13(5): e0198488. doi: 10.1371/journal.pone.0198488.  
42  
43 535 51.Kennedy GD, Tevis SE, Kent KC. Is there a relationship between patient  
44 536 satisfaction and favorable outcomes? *Ann Surg* 2014; 260: 592–600.  
45  
46 537  
47  
48  
49  
50  
51  
52  
53  
54  
55  
56  
57  
58  
59  
60

STROBE Statement—Checklist of items that should be included in reports of *cross-sectional studies*

|                           | Item No | Recommendation                                                                                                                                                                                    |                                                   |
|---------------------------|---------|---------------------------------------------------------------------------------------------------------------------------------------------------------------------------------------------------|---------------------------------------------------|
| <b>Title and abstract</b> | 1       | (a) Indicate the study's design with a commonly used term in the title or the abstract<br>(b) Provide in the abstract an informative and balanced summary of what was done and what was found     | Title, paragraph 1-2<br>Abstract, paragraph 30-50 |
| <b>Introduction</b>       |         |                                                                                                                                                                                                   |                                                   |
| Background/rationale      | 2       | Explain the scientific background and rationale for the investigation being reported                                                                                                              | Background, paragraph 79-131                      |
| Objectives                | 3       | State specific objectives, including any prespecified hypotheses                                                                                                                                  | Background, paragraph 132-133                     |
| <b>Methods</b>            |         |                                                                                                                                                                                                   |                                                   |
| Study design              | 4       | Present key elements of study design early in the paper                                                                                                                                           | Study design, paragraph 150                       |
| Setting                   | 5       | Describe the setting, locations, and relevant dates, including periods of recruitment, exposure, follow-up, and data collection                                                                   | Setting, paragraph 136-138                        |
| Participants              | 6       | (a) Give the eligibility criteria, and the sources and methods of selection of participants                                                                                                       | sample, paragraph 153-171                         |
| Variables                 | 7       | Clearly define all outcomes, exposures, predictors, potential confounders, and effect modifiers. Give diagnostic criteria, if applicable                                                          | paragraph 177-186                                 |
| Data sources/measurement  | 8*      | For each variable of interest, give sources of data and details of methods of assessment (measurement). Describe comparability of assessment methods if there is more than one group              | paragraph 192-201                                 |
| Bias                      | 9       | Describe any efforts to address potential sources of bias                                                                                                                                         | paragraph 165-171                                 |
| Study size                | 10      | Explain how the study size was arrived at                                                                                                                                                         | Sample, paragraph 153-160                         |
| Quantitative variables    | 11      | Explain how quantitative variables were handled in the analyses. If applicable, describe which groupings were chosen and why                                                                      | Data Analysis, paragraph 158-161                  |
| Statistical methods       | 12      | (a) Describe all statistical methods, including those used to control for confounding                                                                                                             | Data Analysis, paragraph 203                      |
|                           |         | (b) Describe any methods used to examine subgroups and interactions                                                                                                                               | Data Analysis, paragraph 204-209                  |
|                           |         | (c) Explain how missing data were addressed                                                                                                                                                       | N/A                                               |
|                           |         | (d) If applicable, describe analytical methods taking account of sampling strategy                                                                                                                | Sample, paragraph 153-160                         |
|                           |         | (e) Describe any sensitivity analyses                                                                                                                                                             | N/A                                               |
| <b>Results</b>            |         |                                                                                                                                                                                                   |                                                   |
| Participants              | 13*     | (a) Report numbers of individuals at each stage of study—eg numbers potentially eligible, examined for eligibility, confirmed eligible, included in the study, completing follow-up, and analysed | General characteristics, paragraph 214-222        |
|                           |         | (b) Give reasons for non-participation at each stage                                                                                                                                              | N/A                                               |
|                           |         | (c) Consider use of a flow diagram                                                                                                                                                                | N/A                                               |
| Descriptive data          | 14*     | (a) Give characteristics of study participants (eg demographic, clinical, social) and information on exposures and potential confounders                                                          | General characteristics, paragraph 214-222        |
|                           |         | (b) Indicate number of participants with missing data for each variable of interest                                                                                                               | Result, paragraph 224-229                         |

|                          |     |                                                                                                                                                                                                              |                               |
|--------------------------|-----|--------------------------------------------------------------------------------------------------------------------------------------------------------------------------------------------------------------|-------------------------------|
| Outcome data             | 15* | Report numbers of outcome events or summary measures                                                                                                                                                         |                               |
| Main results             | 16  | (a) Give unadjusted estimates and, if applicable, confounder-adjusted estimates and their precision (eg, 95% confidence interval). Make clear which confounders were adjusted for and why they were included | Result, paragraph 234-241     |
|                          |     | (b) Report category boundaries when continuous variables were categorized                                                                                                                                    | Result, paragraph 234-241     |
|                          |     | (c) If relevant, consider translating estimates of relative risk into absolute risk for a meaningful time period                                                                                             | N/A                           |
| Other analyses           | 17  | Report other analyses done—eg analyses of subgroups and interactions, and sensitivity analyses                                                                                                               | N/A                           |
| <b>Discussion</b>        |     |                                                                                                                                                                                                              |                               |
| Key results              | 18  | Summarise key results with reference to study objectives                                                                                                                                                     | Discussion, paragraph 251-253 |
| Limitations              | 19  | Discuss limitations of the study, taking into account sources of potential bias or imprecision. Discuss both direction and magnitude of any potential bias                                                   | paragraph 54-60               |
| Interpretation           | 20  | Give a cautious overall interpretation of results considering objectives, limitations, multiplicity of analyses, results from similar studies, and other relevant evidence                                   | Discussion, paragraph 249-342 |
| Generalisability         | 21  | Discuss the generalisability (external validity) of the study results                                                                                                                                        | Conclusion, paragraph 334-350 |
| <b>Other information</b> |     |                                                                                                                                                                                                              |                               |
| Funding                  | 22  | Give the source of funding and the role of the funders for the present study and, if applicable, for the original study on which the present article is based                                                | Funding, paragraph 368-370    |

\*Give information separately for exposed and unexposed groups.

**Note:** An Explanation and Elaboration article discusses each checklist item and gives methodological background and published examples of transparent reporting. The STROBE checklist is best used in conjunction with this article (freely available on the Web sites of PLoS Medicine at <http://www.plosmedicine.org/>, Annals of Internal Medicine at <http://www.annals.org/>, and Epidemiology at <http://www.epidem.com/>). Information on the STROBE Initiative is available at [www.strobe-statement.org](http://www.strobe-statement.org).

# BMJ Open

## Inpatients' satisfaction with nursing care in the backward region: a cross-sectional study from Northwestern China

|                                 |                                                                                                                                                                                                                                                                                                                                                                                                |
|---------------------------------|------------------------------------------------------------------------------------------------------------------------------------------------------------------------------------------------------------------------------------------------------------------------------------------------------------------------------------------------------------------------------------------------|
| Journal:                        | <i>BMJ Open</i>                                                                                                                                                                                                                                                                                                                                                                                |
| Manuscript ID                   | bmjopen-2019-034196.R1                                                                                                                                                                                                                                                                                                                                                                         |
| Article Type:                   | Original research                                                                                                                                                                                                                                                                                                                                                                              |
| Date Submitted by the Author:   | 09-Dec-2019                                                                                                                                                                                                                                                                                                                                                                                    |
| Complete List of Authors:       | Zhang, J ; Gansu Provincial Hospital, Nursing Department<br>Yang, Limei; Gansu Provincial Hospital, In-Patient services Center<br>Wang, Xiaoying; Gansu Provincial Hospital, Anorectal Department<br>Dai, Jiao; Gansu Provincial Hospital, Nursing Department<br>Shan, Wenjing; Gansu Provincial Hospital, Nursing Department<br>Wang, Jiancheng; Gansu provincial Hospital, Elder Department; |
| <b>Primary Subject Heading</b>: | Health services research                                                                                                                                                                                                                                                                                                                                                                       |
| Secondary Subject Heading:      | Epidemiology, Health services research, Nursing                                                                                                                                                                                                                                                                                                                                                |
| Keywords:                       | EPIDEMIOLOGY, SOCIAL MEDICINE, STATISTICS & RESEARCH METHODS                                                                                                                                                                                                                                                                                                                                   |
|                                 |                                                                                                                                                                                                                                                                                                                                                                                                |

SCHOLARONE™  
Manuscripts



I, the Submitting Author has the right to grant and does grant on behalf of all authors of the Work (as defined in the below author licence), an exclusive licence and/or a non-exclusive licence for contributions from authors who are: i) UK Crown employees; ii) where BMJ has agreed a CC-BY licence shall apply, and/or iii) in accordance with the terms applicable for US Federal Government officers or employees acting as part of their official duties; on a worldwide, perpetual, irrevocable, royalty-free basis to BMJ Publishing Group Ltd ("BMJ") its licensees and where the relevant Journal is co-owned by BMJ to the co-owners of the Journal, to publish the Work in this journal and any other BMJ products and to exploit all rights, as set out in our [licence](#).

The Submitting Author accepts and understands that any supply made under these terms is made by BMJ to the Submitting Author unless you are acting as an employee on behalf of your employer or a postgraduate student of an affiliated institution which is paying any applicable article publishing charge ("APC") for Open Access articles. Where the Submitting Author wishes to make the Work available on an Open Access basis (and intends to pay the relevant APC), the terms of reuse of such Open Access shall be governed by a Creative Commons licence – details of these licences and which [Creative Commons](#) licence will apply to this Work are set out in our licence referred to above.

Other than as permitted in any relevant BMJ Author's Self Archiving Policies, I confirm this Work has not been accepted for publication elsewhere, is not being considered for publication elsewhere and does not duplicate material already published. I confirm all authors consent to publication of this Work and authorise the granting of this licence.

1  
2  
3  
4  
5  
6  
7  
8  
9  
10  
11  
12  
13  
14  
15  
16  
17  
18  
19  
20  
21  
22  
23  
24  
25  
26  
27  
28  
29  
30  
31  
32  
33  
34  
35  
36  
37  
38  
39  
40  
41  
42  
43  
44  
45  
46  
47  
48  
49  
50  
51  
52  
53  
54  
55  
56  
57  
58  
59  
60

1 **Inpatients' satisfaction with nursing care in the backward region: a**  
2 **cross-sectional study from Northwestern China**

3 Zhang Juxia RN<sup>1</sup>, Yang Limei RN<sup>2</sup>, Wang Xiaoying RN<sup>3</sup>, Dai Jiao<sup>1</sup>, Shan Wenjing<sup>1</sup>, Wang  
4 Jiancheng Prof. PhD<sup>4\*</sup>

5  
6  
7 1 Nursing Department, Gansu Provincial Hospital, Lanzhou, China

8 Email: juxia2008@hotmail.com

9 2 In-Patient services Center, Gansu Provincial Hospital, Lanzhou, China

10 Email: YangLM@163.com

11 3 Anorectal Department, Gansu Provincial Hospital, Lanzhou, China

12 Email: 27385673@qq.com

13 4 Elder Department, Gansu Provincial Hospital, Lanzhou, China

14 Email: 364954672@qq.com

15  
16  
17 \*Corresponding author:

18 Wang Jiancheng, Prof. PhD. Elder Department, Gansu Provincial Hospital, Lanzhou, China

19 Email: 364954672@qq.com

1  
2  
3 **29 Abstract**  
4  
5

6 **30 Objectives** The aim of the study was to examine the level of patient satisfaction with  
7  
8 nursing care and identify the factors affecting satisfaction from the in-patients'  
9  
10 viewpoints in backward region of China.  
11  
12

13 **33 Design** This was a cross-sectional study.  
14

15 **34 Setting** The study was conducted at a tertiary hospital located in Northwest China.  
16

17 **35 Participants** Patients who were admitted to the ward for at least 48 hours were  
18  
19 chosen to undertake the survey.  
20  
21

22 **37 Primary outcome measure** The Newcastle Satisfaction with Nursing care Scale was  
23  
24 used. Data were collected from 219 patients.  
25  
26

27 **39 Results** The overall inpatient satisfaction with nursing care was 60.5% with the mean  
28  
29 score being  $78.15 \pm 4.74$ . Patients were more satisfied with nurses who respected their  
30  
31 privacy and treated them as individuals (67.7%). Patients were least satisfied with the  
32  
33 type of information nurses gave to them (11.7%) and awareness of their needs.  
34  
35

36 Patients who were married, having a history of hospitalization, having a history of  
37  
38 surgery and in-charged by junior nurses had higher satisfaction with nursing.  
39  
40

41 **45 Conclusions** The overall level of patient satisfaction was moderate in this study in  
42  
43 comparison to many studies. There is a need for nurses to be aware of patients'  
44  
45 individualized care needs and provide more information for them. This study  
46  
47 may urge hospital administrators, policy makers and nurses to be more sensitive with  
48  
49 patients' married status, history of hospitalization and surgery, professional title of in-  
50  
51 charged nurses when providing care.  
52  
53  
54

55 **51 Keywords:** Inpatient, Nursing care, Satisfaction, Backward region, China  
56  
57

58  
59  
60 **52**

### 53 **Strengths and limitations of this study**

- 54 ● This study is the first to evaluate inpatients' satisfaction with nursing care using  
55 NSNS instrument in less developed and more economically burdened Chinese  
56 areas.
- 57 ● The sample of the study was recruited from one hospital in northwest China. As  
58 such, its social background and current situation of healthcare disturbance may be  
59 different from other areas.
- 60 ● The study sample was small, so it is not likely to be representative of the patients  
61 in all Chinese hospitals. Larger samples across multiple sites are needed in future  
62 research.
- 63 ● The study adopted self-reported questionnaires, so all answers were based on the  
64 respondents' own perception. Hence, there is a possibility that their responses  
65 were influenced by social desirability, leading to response bias.

66

67

68

69

70

71

72

73

74

75

76



## 77 **Background**

78 Patient satisfaction have been defined by scholars from different aspects. Swarupa  
79 defined it as people's expectation for health care services due to the requirements of  
80 health, disease, quality of life and other aspects.<sup>1</sup>Berkowitz suggested that patient  
81 satisfaction is an individual's evaluation of the degree to which the medical services  
82 provided are in line with their expectations and preferences.<sup>2</sup> Ahmed believes that  
83 patient satisfaction is the result of patients filtering medical service experience and  
84 evaluating the degree to which medical service experience meets their needs from  
85 their own unique perspective.<sup>3</sup>Among them, most scholars believe that the best  
86 definition of patient satisfaction is the evaluation of medical services by patients  
87 based on the degree to which their expectations are met. <sup>4</sup>Based on this expectation,  
88 the evaluation of patient satisfaction objectively reflect the quality of health care  
89 services which becomes the gold standard and widely used metric to measure hospital  
90 quality management.<sup>5,6</sup>

91 Patient satisfaction with nursing service is an important component of patient  
92 satisfaction, <sup>7</sup>and there is no consistent definition at present. Risser defines it as the  
93 degree to which the patient's expectation of ideal care is consistent with the actual  
94 care.<sup>8</sup>Eriksen defines it as the subjective evaluation made by patients according to  
95 their own expectations of nursing and their cognitive and emotional reactions to the  
96 interaction of actual receiving nursing services. <sup>9</sup>The American Nurses Association  
97 (ANA) is defined as a patient or his family staff's evaluation of the nursing care  
98 received. <sup>10</sup> The above definitions are slightly different, and the consistent point is that  
99 patients' satisfaction with nursing is a subjective feeling, which is closely related to  
100 their expectation and perception of nursing quality. From the time of admission until

1  
2  
3 101 discharge, nurses provide care for patients every day without fail and are involved in  
4  
5 102 almost every aspect of patient care. Therefore, as main healthcare providers, nurses  
6  
7 103 have a significant impact upon patients' perceptions about their hospital experience.<sup>7</sup>  
8  
9  
10 104 Thus, patients' satisfaction regarding nursing service become an important indicator  
11  
12 105 of the care quality.<sup>11,12</sup>  
13  
14

15 106 In order to achieve the goal of high-care quality, decision makers should not only  
16  
17 107 know whether the patient is satisfied, but also, more importantly, why the patient is  
18  
19 108 not satisfied. That is, they should identify the factors that affect the patient's  
20  
21 109 satisfaction with nursing services, so as to carry out nursing that meets patients' care  
22  
23 110 needs. In this case, many studies are occurring globally to evaluate patients'  
24  
25 111 satisfaction with nursing services. More than half of the respondents (52.75%) in an  
26  
27 112 Ethiopian Study were satisfied with the nursing care they received, citing factors such  
28  
29 113 as previous history of admission, patients' income level, and type of admission rooms  
30  
31 114 to affect overall satisfaction.<sup>13</sup> A study in Malaysia found that less patients were  
32  
33 115 satisfied with certain parts of the services (47.5%), while a low level of education,  
34  
35 116 monthly household income less than 3000 and frequency of visits had significant  
36  
37 117 association with high level of satisfaction.<sup>14</sup> Another study in Pakistan showed that  
38  
39 118 45% of patients were satisfied with nursing services,<sup>15</sup> in contrast to Lebanon  
40  
41 119 (96.6%).<sup>16</sup> Although these studies used various instruments to assess patient  
42  
43 120 satisfaction, the studies indicate that current nursing services could not fully satisfy  
44  
45 121 patient needs.  
46  
47  
48  
49  
50  
51

52  
53 122 In China, there are 20918 hospitals in different levels with 20 million registered  
54  
55 123 nurses. The average bed to nurse ratio is about 1:0.45. Of them, the 2232 tertiary  
56  
57 124 public hospitals account for only 7.66% of the all-types health facilities, yet provide  
58  
59 125 nearly half (42.5%) of the inpatient care.<sup>17</sup> On average, the rate of one nurse per 1000  
60

1  
2  
3 126 population was lower than the WHO standard of 2.28 per 1000 population.<sup>18</sup>  
4  
5 127 Excessive workloads lead to lower job satisfaction in nurse staff across tertiary  
6  
7 128 hospitals in comparison to other types of health facilities.<sup>17,19</sup> Under such  
8  
9 129 environments, the patient satisfaction in tertiary hospitals needs more attention.  
10  
11 130 Ministry of Health of China formulated the " Standards for Implementing Quality  
12  
13 131 Nursing Services in Hospitals ( Trial )" in 2010, which aimed to provide patients with  
14  
15 132 safe and high-quality nursing services.<sup>20</sup> With these standards, " high quality nursing  
16  
17 133 service project" was carried out at a national level. By the end of 2015, all tertiary  
18  
19 134 hospitals in China had carried out high-quality nursing services, with 87.0 % of them  
20  
21 135 being tertiary A-class hospitals and 82.6 % were B-class.<sup>21</sup>  
22  
23  
24  
25

26 136 At present, the survey on the satisfaction of hospitalized patients with nursing  
27  
28 137 service in China is confusing. On one hand, patients in different facilities reported  
29  
30 138 high satisfaction about nursing service. A survey in 71 Chinese hospitals showed  
31  
32 139 patient satisfaction in 80% of the hospitals to be more than 90%.<sup>22</sup>In other hospitals  
33  
34 140 78% of patients were satisfied.<sup>23</sup> A study in Shandong Province showed 79.8% of  
35  
36 141 patients to be satisfied with nursing care, with patients' position, culture, income and  
37  
38 142 reason for choosing the hospital being the main factors affecting satisfaction.<sup>24</sup> Jiao's  
39  
40 143 study found that 82.9% of inpatients were satisfied with the overall nursing service,  
41  
42 144 and age, education level, self-perceived health status and department had influence on  
43  
44 145 satisfaction.<sup>25</sup> These indicated that Chinese nursing service continues to be improved  
45  
46 146 with the implementation of the high-quality care project. However, unfaithful reports  
47  
48 147 by the media and continuous occurrence of disputes and violence are inconsistent with  
49  
50 148 the results of the satisfaction survey. An analysis of workplace violence shows that  
51  
52 149 40.8% of hospital nurses in China have experienced different types of workplace  
53  
54 150 violence.<sup>26</sup>Zou et al study showed there is a high incidence(59.7 %) of workplace  
55  
56  
57  
58  
59  
60

1  
2  
3 151 violence among nurses in Chinese tertiary hospitals.<sup>27</sup> In Wang et al's study 6.67% of  
4  
5 152 nurses suffered violence in the workplace.<sup>28</sup> Violence in these workplaces will affect  
6  
7  
8 153 nurses' mental health, leading to job burnout,<sup>29</sup> and thus reduce the quality of nursing  
9  
10 154 services. The frequent occurrence of workplace violence in hospitals directly reflects  
11  
12 155 the dissatisfaction of patients with the quality of medical care. Thus, hospital-specific  
13  
14 156 data are still required to provide evidence for cross-country and cross-cultural  
15  
16  
17 157 comparisons of satisfaction and factors affecting satisfaction using standardized tools.

18  
19 158 Gansu province is located in north-west of China. Affected by region, the  
20  
21 159 development of economy, culture and information is relatively backward there.  
22  
23  
24 160 According to China's economic comprehensive competitiveness development report,  
25  
26 161 Gansu Province ranks 27th among the 31 provinces in China.<sup>30</sup> With continuous  
27  
28 162 development in the overall scale of Hospitals in Gansu, the scope of service is getting  
29  
30 163 larger, and the number of patients received is also gradually increasing. Hospital  
31  
32 164 managers pay more attention to the satisfaction survey of patients and incorporate the  
33  
34 165 survey results into the staffs' performance evaluation index system of clinical  
35  
36  
37 166 departments. <sup>24</sup>According to our review of the satisfaction survey questionnaire in use,  
38  
39 167 the questionnaire has always followed the older design scheme and focuses on the  
40  
41 168 overall medical treatment experience, which cannot fully reflect the patient's nursing  
42  
43 169 experience in detail. Hu's study, which assessed inpatients' satisfaction in one  
44  
45 170 hospital in Gansu, showed patient satisfaction to be 80.9% with environment being  
46  
47 171 the main factor affecting patients satisfaction.<sup>31</sup>Xing et al evaluated satisfactory  
48  
49 172 degree of inpatients in some hospitals in Northwest region to nursing services and  
50  
51 173 found the whole satisfactory degree of nursing service as 82.49%. The influence  
52  
53 174 factors of satisfactory degree were age, degree of education, average income per  
54  
55  
56 175 person in family, and self-feeling of health status. <sup>32</sup> With the continuous  
57  
58  
59  
60

1  
2  
3 176 improvement of people's requirements for service level, especially for some high-end  
4  
5 177 customers, the traditional mode of medical service cannot meet their diversified needs.  
6  
7 178 As a result, complaints and complaints from patients occur frequently<sup>32</sup>. In light of  
8  
9 179 this situation, hospital managers urgently need to understand the gap between the  
10  
11 180 changes in customer care needs and the capabilities of the hospital to providing care  
12  
13 181 in a timely and dynamic manner, as well as know what factors are affecting patients  
14  
15 182 satisfaction. This enables nurses managers to carry out individualized nursing  
16  
17 183 according to the characteristics of different patients, thus achieving customer needs  
18  
19 184 through continuous self-improvement and improving the patient's nursing experience.  
20  
21  
22  
23

24 185 Gansu Provincial Hospital is a comprehensive hospital integrating medical  
25  
26 186 service, scientific research, clinical teaching and preventive health care in Lanzhou,  
27  
28 187 Gansu. In recent years, it has maintained a relatively high development speed. The  
29  
30 188 development of Gansu Provincial Hospital represents the development status of most  
31  
32 189 public medical institutions, especially in the underdeveloped areas in northwest China.  
33  
34 190 The hospitalized patients received by the hospital mainly come from residents and the  
35  
36 191 people in the surrounding cities and states. Choosing the hospital to carry out the  
37  
38 192 satisfaction survey of the related hospitalized patients can better understand the  
39  
40 193 expectations of patients from different social strata in Gansu area on the nursing  
41  
42 194 quality. To our knowledge, this is the first study in Gansu to use NSNS to measure  
43  
44 195 satisfaction with nursing care. Thus, this study has two aims: (1) to assess patient  
45  
46 196 satisfaction with nursing care using NSNS instrument, so as to find out the gap  
47  
48 197 between patients' expectations and the hospital's service provision. (2) to investigate  
49  
50 198 the factors affecting patient satisfaction with nursing care, so as to provide more  
51  
52 199 accurate reference for hospital managers and relevant regulatory agencies.  
53  
54  
55  
56  
57

## 58 200 **Methods**

59  
60

1  
2  
3 **201 Study design**  
4

5  
6 202 This study was a cross-sectional survey.  
7

8 **203 Study setting and the participants**  
9

10 204 This study was conducted at Gansu Provincial Hospital(GPH), a tertiary hospital with  
11  
12 205 1700-beds. The services at GPH include ear, nose and throat, surgery, outpatients  
13  
14 206 clinic, emergency, gynaecology and obstetrics, paediatrics and neonatal intensive care  
15  
16 207 unit, maternal and child health, physiotherapy, dental, radiology, traditional Chinese  
17  
18 208 medicine, rehabilitation, and internal medicine. GPH is also a teaching hospital for  
19  
20 209 nursing, health officer, medicine, midwifery and pharmacy undergraduate and  
21  
22 210 graduate students. The hospital has a total of 4070 employees, 1200 of which are  
23  
24 211 nurses who provide health care in 60 nursing units. The average outpatient per day  
25  
26 212 was approximately 4500 with 250 of them being admitted to different wards.  
27  
28  
29

30 213 The sample of the study was determined using simple random sampling. The  
31  
32 214 number of open beds in GPH is about 1500, after excluding departments such as  
33  
34 215 paediatrics, intensive care units, emergency wards and VIP wards (about 200).The  
35  
36 216 population of the study was calculated using the formula  $N = Z^2.P(1-P)/E^2$ .<sup>5</sup> In the  
37  
38 217 formula, the symbols represent the following: a margin of error (E)= 5%.In order to  
39  
40 218 narrow the interval, and make the estimation of effect quantity more accurate, we  
41  
42 219 chose 99% as the confidence level,  $Z=2.58$ . 90% patient satisfaction with nursing  
43  
44 220 care.<sup>16</sup> We calculated the sample using the following: $Z^2.P(1-P)/ E^2= (2.58*2.58)$   
45  
46 221  $0.90(1-0.90)/ (0.05*0.05)= 6.65*0.09/ 0.0025= 239$ .Then we added 20% to the  
47  
48 222 sample size for non-response or for selection bias, thus making the sample size = 288  
49  
50 223 approximately. Patients should meet the following inclusion criteria: (1) $\geq 18$ years old;  
51  
52 224 (2)admitted in the wards at least for 48h; (3)capable of independent communication;  
53  
54 225 (3)voluntary participation. Patients were excluded on any one of the following:  
55  
56  
57  
58  
59  
60

1  
2  
3 226 patients in intensive care unit; pediatric patients; emergency observation ward patients;  
4  
5 227 VIP patients in selected wards. Medical, surgical, gynaecology and obstetrics and ear,  
6  
7  
8 228 nose and throat wards were purposefully selected and based on the calculated sample  
9  
10 229 size, the required number of patients from each ward was proportionally allocated.  
11  
12 230 The study started on August 2018. At the time of admission, each new patient to those  
13  
14 231 wards was informed about the purpose of the survey and then a lottery method was  
15  
16 232 adopted to randomly select patients to be considered by the nurse manager. Then, the  
17  
18 233 nurse manager informed trained students who met the requirements. Subsequently,  
19  
20 234 the students made records and attended to patients 48h later from their  
21  
22  
23 235 admission. Finally, 32 patients were excluded with 12 of them being younger than 18  
24  
25 236 years old and 20 who disagreed to participate. 291 patients were included for further  
26  
27  
28 237 analysis.

### 238 **Instruments**

239 The questionnaire included: (1) general demographic characteristics: age, gender,  
240  
241 educational status, marital status, monthly family income, history of admission,  
242  
243 hospital length of stay, admission ward, professional title of patients' nurse in charge.  
244  
245 (2) NSNS to measure satisfaction with nursing care. The NSNS was developed by  
246  
247 Thomas et al.<sup>33</sup> The scale has been translated into different languages and has been  
248  
249 applied in many studies. The Chinese version of the scale was tested for its validity  
250  
251 and reliability by Jiao with Cogent Validity index is 0.98 and Cronbach's alpha is  
252  
253 0.97.<sup>25</sup> The NSNS includes two subscales: the Experience of Nursing Care Scale  
254  
255 (ENCS) and the Satisfaction with Nursing Care Scale (SNCS). These two subscales  
256  
257 can be applied either together or separately. In this study, the SNCS was applied,  
258  
259 consisting of a total of 19 items and using a 5-point Likert scale. For assessing the  
260  
261 degree of satisfaction, 'not at all', 'barely', 'satisfied', 'very', 'completely' scored

1  
2  
3 251 from 1- 5 respectively. Patient responses across all items are summed and transformed  
4  
5 252 to yield an overall satisfaction score between 0–95, which denotes none or complete  
6  
7  
8 253 satisfaction with all aspects of nursing care.

#### 9 10 254 **Patient and Public Involvement**

11  
12 255 Before the survey, the nurse manager explained the purpose of the study. Patients  
13  
14 256 have the right to refuse to participate in the study and to withdraw at any time during  
15  
16  
17 257 the study. Patients are required to provide detailed and accurate information as much  
18  
19 258 as possible during the investigation to ensure the accuracy of the results. The  
20  
21 259 questionnaire did not indicate the patient's identification information. No patient  
22  
23  
24 260 participated in the recruitment and implementation of the study.

#### 25 26 261 **Institutional Review Board approval**

27  
28 262 Consent was acquired from the nurse director of each ward and verbal approvals  
29  
30 263 were obtained from patients. This study was also approved by Gansu Provincial  
31  
32  
33 264 Hospital Research Ethics Committee.

#### 34 35 36 265 **Data collection**

37  
38  
39 266 Five nursing students were trained previously by one of the authors(ZJX). The  
40  
41 267 training lasted for two days. On the first day, students were trained to understand the  
42  
43 268 meaning of each item of the questionnaire. On the second day, students were shown  
44  
45  
46 269 how to communicate with patients. After that, each student selected a patient in a  
47  
48 270 specified department to conduct a pre-survey using the questionnaire, and gave  
49  
50  
51 271 feedback regarding the survey process, so that the trainers could answer them in a  
52  
53 272 timely manner. After training, the students attended wards from Monday to Friday to  
54  
55 273 collect data. The selected patients who had at least 2 days inpatient experiences in  
56  
57  
58 274 each ward were approached by the students. A private room at the department was  
59  
60 275 used to interview patients. Family members were present during some of the



1  
2  
3 276 interviews at the request of patients. If the patient could not fill in the form due to  
4  
5 277 various factors, the student would ask the question and gave a certain amount of time  
6  
7  
8 278 for patients to make statements for each question. After each question, the student  
9  
10 279 helped to fill in the questionnaire according to patients answer. In addition, medical  
11  
12 280 records were reviewed for certain variables such as hospital length of stay and history  
13  
14 281 of admission. Untill November of 2018, there were 291 patients who completed the  
15  
16  
17 282 survey.

### 19 283 **Data analysis**

21 284 The data were collected and analyzed with SPSS version 21.0. Patient satisfaction  
22  
23 285 with nursing service was described by the mean, standard deviation, frequency and  
24  
25 286 percentage. As the missing data was less than 5% in some items, we used listwise  
26  
27  
28 287 deletion to deal with them. Considering the study by Ahmed et al,<sup>13</sup> we used the same  
29  
30 288 method to use mean satisfaction score as a cut point to dichotomise satisfaction into  
31  
32 289 ‘satisfied’ and ‘not satisfied’. Based on the years of experience, the profession title of  
33  
34 290 nurses were divided into junior(1-5 years) and senior(above 5 years). In addition to  
35  
36 291 hospitalization, we also checked whether patients had a history of hospitalization in  
37  
38 292 the past. Binary logistics regression analysis and backward stepwise method was used  
39  
40 293 to screen variables which affect patient satisfaction. The strength of the associations  
41  
42 294 was described using OR and 95% CI.

## 47 295 **Results**

### 50 296 **Patients’ characteristics**

52 297 Of the participants, the mean age is  $45.59 \pm 15.96$ . As seen in table 1, 54.6% were  
53  
54 298 male, 87.6% were married and 23.7% were primary school graduates; 33.7% were  
55  
56 299 admitted in medical department, 43.6% had monthly family incomes between 3000-  
57  
58 300 4999 RMB(related to 436-726 USD). More than three-quarters (79%) of patients  
59  
60

301 knew the name of their nurse in charge of their nursing care and more than half(61,7%)  
 302 were cared by junior registered nurses. Patients had variations in the duration of their  
 303 hospital stays (2 - 36 days) with a mean of  $7.20 \pm 5.69$  days. The hospital length of  
 304 stay of inpatients in surgery ward (an average of 11 days) was longer than that for  
 305 medical inpatients (an average of 7 days). See table 1.

306 **Table 1** Sociodemographic characteristics and NSNS calculated score for example(N=291)

| Variables                                         | Categories                            | Frequency | NSNS score          |
|---------------------------------------------------|---------------------------------------|-----------|---------------------|
|                                                   |                                       | n(%)      | Mean (SD)           |
| Sex                                               | Male                                  | 159(54.6) | 79.00±4.44          |
|                                                   | Female                                | 132(45.4) | 77.12±4.85          |
| Monthly family income(CNY)*                       | <100                                  | 1(0.3)    | 78.0±0.35           |
|                                                   | <1000                                 | 17(5.7)   | 77.52±4.05          |
|                                                   | 1000-2999                             | 103(34.6) | 85.0±0.05           |
|                                                   | 3000-4999                             | 130(43.6) | 78.56±4.37          |
|                                                   | ≥5000                                 | 39(13.1)  | 77.0±6.45           |
|                                                   | ≥10000                                | 1(0.3)    | 78.52±4.05          |
| Marital status                                    | Single                                | 20(6.9)   | 78.5±2.35           |
|                                                   | Married                               | 255(87.6) | 77.98±4.95          |
|                                                   | Others                                | 16(5.5)   | 80.4±1.59           |
| Educational status                                | Primary school                        | 69(23.7)  | 78.27±4.01          |
|                                                   | High school                           | 146(50.2) | 77.90±4.53          |
|                                                   | Advanced diploma                      | 40(13.7)  | 77.82±6.15          |
|                                                   | Bachelor's degree                     | 35(12.0)  | 79.11±4.96          |
|                                                   | Master degree                         | 1(0.3)    | 85.0±0.05           |
| Admission ward                                    | Medicine                              | 99(33.7)  | 78.62±4.93          |
|                                                   | Surgery                               | 78(26.5)  | 77.63±2.97          |
|                                                   | Obstetrics and gynecology             | 42(14.4)  | 74.5±5.5            |
|                                                   | Ophthalmology and otorhinolaryngology | 18(6.2)   | 79.77±3.13          |
|                                                   | Rehabilitation department             | 22(7.6)   | 80.86±5.13          |
| History of admission                              | Yes                                   | 146(50.2) | 78.76±4.57          |
|                                                   | No                                    | 145(49.8) | 77.53±4.82          |
| Patients know the nurse in charge of his/her care | Yes                                   | 221(75.9) | 78.47±4.65          |
|                                                   | No                                    | 70(24.1)  | 77.14±4.82          |
| Living area                                       | urban                                 | 146(50.2) | 77.98±4.08          |
|                                                   | rural                                 | 145(49.8) | 78.31±5.28          |
| Title of staff nurse                              | Junior RN                             | 177(61.7) | 79.15±4.25          |
|                                                   | Senior RN                             | 114(38.3) | 76.56±4.98          |
| <b>Mean satisfaction score</b>                    |                                       |           | <b>78.15 ± 4.74</b> |

307 NSNS, Newcastle Satisfaction with Nursing Scale.\*USD1 is 7.4 Chinese Yuan (CNY).

### 308 Satisfaction with nursing care

309 As shown in Table 1, the average satisfaction score of patients is  $78.15 \pm 4.74$ .

310 Regarding nursing care, as shown in table 2, patients reported the highest satisfaction

311 when nurses treated them as an individual(67.7%) and respected their privacy (60.8%).  
 312 Patients were least satisfied with the type of information nurses gave to them(11.7%)  
 313 and a lack of awareness in the patient's needs(9.6%). As showed in table 3, after  
 314 dichotomising satisfaction into 'satisfied' and 'not satisfied', 60.5% of the study  
 315 participants were satisfied with the care provided by nurses(Figure 1).

316 **Table 2** Percentage distribution of items for satisfaction with nursing care in admitted patients at GPH.

| Item                                                                                    | Not at all satisfied<br>n (%) | Barely satisfied<br>n (%) | Quite satisfied<br>n (%) | Very satisfied<br>n (%) | Completely satisfied<br>n (%) |
|-----------------------------------------------------------------------------------------|-------------------------------|---------------------------|--------------------------|-------------------------|-------------------------------|
| 1.The amount of time nurses spent with patient                                          | 0                             | 4(1.4)                    | 42(14.4)                 | 179(61.5)               | 66(22.7)                      |
| 2.How capable nurses were at their job                                                  | 0                             | 1(0.3)                    | 16(5.5)                  | 156(53.6)               | 118(40.5)                     |
| 3.There always being a nurse around when needed                                         | 0                             | 2(0.7)                    | 58(19.9)                 | 164(56.4)               | 67(23.0)                      |
| 4.The amount nurses knew about patient care                                             | 0                             | 1(0.3)                    | 38(13.1)                 | 193(66.3)               | 59(20.3)                      |
| 5.How quickly nurses came when patient called them                                      | 0                             | 1(0.3)                    | 30(10.3)                 | 123(42.3)               | 137(47.1)                     |
| 6.The way the nurses made patient feel at home                                          | 0                             | 1(0.3)                    | 47(16.2)                 | 187(64.3)               | 56(19.2)                      |
| 7.The amount of information nurses gave to patient about their condition and treatment  | 0                             | 5(1.7)                    | 124(42.6)                | 102(35.1)               | 60(20.6)                      |
| 8.How often nurses checked to see if patients were well                                 | 0                             | 1(0.3)                    | 27(9.3)                  | 176(60.5)               | 87(29.9)                      |
| 9.Nurses' helpfulness                                                                   | 0                             | 1(0.3)                    | 26(8.9)                  | 192(66.0)               | 72(24.7)                      |
| 10.The way nurses explained things to patient                                           | 1(0.3)                        | 0                         | 29(10.0)                 | 166(57.0)               | 95(32.6)                      |
| 11.How nurses helped put patient relatives' or friends' minds at rest                   | 0                             | 0                         | 41(14.1)                 | 161(55.3)               | 89(30.6)                      |
| 12.Nurses' manner in going about their work                                             | 0                             | 0                         | 12(4.4)                  | 111(38.1)               | 167(57.4)                     |
| 13.The type of information nurses gave to patient about his/her condition and treatment | 0                             | 3(1.0)                    | 97(33.3)                 | 157(54)                 | 34(11.7)                      |
| 14.Nurses' treatment of patient as an individual                                        | 0                             | 1(0.3)                    | 14(4.8)                  | 78(26.8)                | 197(67.7)                     |
| 15.How nurses listened to patient worries and concerns                                  | 0                             | 1(0.3)                    | 55(18.9)                 | 196(67.4)               | 39(13.4)                      |
| 16.The amount of freedom patient was given on the ward                                  | 0                             | 0                         | 83(28.5)                 | 170(58.4)               | 38(13.1)                      |
| 17.How willing nurses were to respond to patient requests                               | 0                             | 2(0.7)                    | 51(17.5)                 | 177(60.8)               | 61(21)                        |
| 18.The amount of privacy nurses gave patient                                            | 0                             | 0                         | 36(12.4)                 | 78(26.8)                | 177(60.8)                     |
| 19.Nurses' awareness of patient needs                                                   | 0                             | 3(1.0)                    | 130(44.7)                | 130(44.7)               | 28(9.6)                       |

317

### 318 **Factors influencing satisfaction**

319 Previous history of hospitalization and surgery were significant factors influencing  
 320 patient satisfaction with nursing care. A higher level of patient satisfaction was found  
 321 to exist in married patients with history of admission( $P<0.05$ ). Patients admitted in  
 322 medical wards showed the highest satisfaction compared to those in other wards. The  
 323 score without surgery was higher than that with( $p=0.045$ , $OR=0.64$ ,  $95\% CI=0.38-$   
 324  $1.07$ ). The higher the nurse's professional title, the lower the score. The patient who

325 did not know the nurse in-charge had the lower score( $p=0.028, OR=1.77, 95\%$   
 326  $CI=0.98-3.19$ )(Table 4).

327 **Table 3** Level of inpatients satisfaction with nursing services in a tertiary hospital of Gansu, China

| Variables                                      | Level of satisfaction                |                                      | OR   |
|------------------------------------------------|--------------------------------------|--------------------------------------|------|
|                                                | Satisfied<br>(score $\geq 78$ ),N(%) | Dissatisfied<br>(score $< 78$ ),N(%) |      |
| <b>Gender</b>                                  |                                      |                                      |      |
| Male                                           | 105(59.66)                           | 54(46.05)                            | 1.16 |
| Female                                         | 71(40.34)                            | 61(53.04)                            |      |
| <b>Marital status</b>                          |                                      |                                      |      |
| Single                                         | 12(6.82)                             | 8(6.96)                              | 0.25 |
| Married                                        | 158(89.77)                           | 97(84.35)                            |      |
| Others                                         | 16(9.09)                             | 0                                    |      |
| <b>Admission ward</b>                          |                                      |                                      |      |
| Medicine                                       | 69(39.20)                            | 29(25.22)                            | 0.97 |
| Surgery                                        | 41(23.29)                            | 36(31.30)                            |      |
| Obstetrics and gynecology                      | 11(6.25)                             | 31(26.96)                            |      |
| Ophthalmology and<br>Rehabilitation department | 13(7.39)                             | 5(4.35)                              |      |
|                                                | 16(9.09)                             | 6(5.22)                              |      |
| <b>History of admission</b>                    |                                      |                                      |      |
| Yes                                            | 95(53.98)                            | 51(44.33)                            | 1.25 |
| No                                             | 81(46.02)                            | 64(55.65)                            |      |
| <b>History of surgery</b>                      |                                      |                                      |      |
| Yes                                            | 81(43.02)                            | 66(57.39)                            | 0.64 |
| No                                             | 95(53.98)                            | 49(42.61)                            |      |
| <b>Know the nurse in charge</b>                |                                      |                                      |      |
| Yes                                            | 140(79.55)                           | 81(70.43)                            | 1.77 |
| No                                             | 36(20.45)                            | 34(29.56)                            |      |
| <b>Title of nurse in charge</b>                |                                      |                                      |      |
| junior                                         | 121(68.75)                           | 56(48.69)                            | 2.39 |
| senior                                         | 55(31.25)                            | 59(51.30)                            |      |
| <b>Educational status</b>                      |                                      |                                      |      |
| Primary school                                 | 43(24.43)                            | 26(22.61)                            | 0.87 |
| High school                                    | 87(49.43)                            | 59(51.30)                            |      |
| Advanced diploma                               | 22(12.50)                            | 18(15.65)                            |      |
| Bachelor's degree                              | 23(13.07)                            | 12(10.43)                            |      |
| Master degree                                  | 1(0.57)                              | 0                                    |      |
| <b>Total</b>                                   | 176(60.50)                           | 115(39.50)                           |      |

328

329 **Table 4** Factors influencing patients' satisfaction with nursing care.

| Variables                | B     | S.E  | Sig.  | 95%CI     |
|--------------------------|-------|------|-------|-----------|
| Gender                   | 0.15  | 0.32 | 0.640 | 0.61,2.19 |
| Marital status           | -1.08 | 0.51 | 0.037 | 0.13,0.93 |
| Admission ward           | -0.02 | 0.12 | 0.839 | 0.76,1.24 |
| History of admission     | 0.29  | 0.38 | 0.045 | 0.67,2.29 |
| History of surgery       | -0.60 | 0.29 | 0.049 | 0.30,0.98 |
| Know the nurse in charge | 0.79  | 0.34 | 0.021 | 1.13,4.35 |
| Title of nurse in charge | 0.99  | 0.30 | 0.001 | 1.49,4.89 |

|  |                    |       |      |       |           |
|--|--------------------|-------|------|-------|-----------|
|  | Educational status | -0.13 | 0.19 | 0.486 | 0.59,1.27 |
|--|--------------------|-------|------|-------|-----------|

## 331 Discussion

332 Patient satisfaction with nursing service is a response to the quality of nursing, an  
 333 important means of nursing quality evaluation, and an effective measure to monitor  
 334 structural quality, process quality and result quality of nursing.<sup>11</sup> The overall  
 335 satisfaction of patients with nursing services is the overall evaluation of the nursing  
 336 services received during hospitalization. The results of this study show that the  
 337 patient's overall satisfaction score for nursing service is 78.15±4.74 points (95 points  
 338 are completely satisfied) with the overall satisfaction of 60.5%. This is higher than the  
 339 results obtained in Taiwan(35%),<sup>34</sup> Ethiopia(49.2%).<sup>35</sup> However, it is lower than that  
 340 in Lebanon,<sup>16</sup> Beijing, China,<sup>36</sup> Spain<sup>37</sup> and Australia.<sup>38</sup> However, this might be  
 341 related to differences in sample size and region and therefore it is difficult to make  
 342 absolute comparison of research results. Nevertheless, these results show that there  
 343 are still many factors leading to dissatisfaction amongst patients with hospital nursing  
 344 services, and nursing managers need to analyze the reasons to formulate  
 345 corresponding management strategies for the problems. Patients' satisfaction with  
 346 hospital care are significantly associated with better patient safety, clinical  
 347 effectiveness,<sup>39</sup> health outcomes<sup>40</sup> and less medical resource utilization.<sup>41</sup> Therefore,  
 348 nurses should be aware of the importance and the role of patients' satisfaction.

349 Although overall patient satisfaction was moderate in this study, the findings  
 350 identified two problems which are in need of improvement: (1) the type of  
 351 information given to patients and (2) the awareness of patient needs. Patients' needs  
 352 assessment is important to define the target areas in which resources and efforts  
 353 should be concentrated.<sup>32</sup> However, the study indicated that nurses did not stress the  
 354 importance of patients care needs. It could be inferred from the research that, first of

1  
2  
3 355 all, nurses may not have enough knowledge reserves to fully answer patients' various  
4  
5 356 questions. Second, due to the heavy workload, more time is spent on completing  
6  
7 357 doctor's orders and other nursing and therapeutic work, and less time is spent on  
8  
9 358 communicating with patients and conducting health education. This may also result  
10  
11 359 from the fact that in most Chinese hospitals there are no nurse assistants whose main  
12  
13 360 tasks are the performance of basic nursing activities such as bathing, oral toilet,  
14  
15 361 changing, ect.<sup>42</sup> Nurse staff of all different statuses need to perform all types of direct  
16  
17 362 and indirect nursing activities in China. Meanwhile, the nurse to patient ratio is one of  
18  
19 363 the impressive nursing care features whereas 0.42:1 in GPH, it was an increase in the  
20  
21 364 number of patients each nurse to provide more direct attention. With such workload,  
22  
23 365 nurses were eager to educate patients and therefore providing incomplete information  
24  
25 366 or information that unmet patients' needs.<sup>43</sup> The findings regarding low patient  
26  
27 367 satisfaction scores related to hospital staff responding to patient needs and  
28  
29 368 information are consistent with the outcomes of other studies.<sup>44,45</sup> Belayneh stated that  
30  
31 369 patients were least satisfied when the least amount of information was given by the  
32  
33 370 nurses.<sup>46</sup> With the increasing demands of medical knowledge, health science  
34  
35 371 knowledge and rehabilitation knowledge, whether patients can acquire enough  
36  
37 372 knowledge becomes an important condition for evaluating nursing services. Chan's  
38  
39 373 study showed that patients who communicated with nurse and doctors about  
40  
41 374 medicines and discharge information were more satisfied with their healthcare  
42  
43 375 provider.<sup>47</sup> In various clinical settings, information is the decisive factor for good  
44  
45 376 patient experience.<sup>48</sup> Poor communication between health care professionals and their  
46  
47 377 patients is a key problem in the growing number of complaints against health care  
48  
49 378 professionals worldwide.<sup>49</sup> Therefore, investigating all aspects of patients' needs and  
50  
51  
52  
53  
54  
55  
56  
57  
58  
59  
60

1  
2  
3 379 providing them with care and information to meet their needs through communication  
4  
5 380 plays an important role in patients' satisfaction.  
6  
7

8  
9 381 Patient perception of service quality is a key indicator of hospital care,<sup>50</sup> which  
10  
11 382 also happens to be one of the main determinants of patients' trust.<sup>51</sup> Therefore, a  
12  
13 383 better understanding of the factors affecting care quality can help hospital managers  
14  
15 384 implement effective plans to improve service quality.<sup>52</sup> In the current study, married  
16  
17 385 patients were more satisfied than others. This finding was in accordance with a study  
18  
19 386 conducted at three public hospitals in the Amhara Region<sup>53</sup> which used the NSNS  
20  
21 387 scale, and in a hospital in China<sup>20</sup> which used other scale to assess patients  
22  
23 388 satisfaction. This could be that married patients are accompanied by their spouses  
24  
25 389 who provides life care and communicates with them. Therefore, they have relatively  
26  
27 390 less care demand from nursing staff. Our study also found those admitted to medical  
28  
29 391 departments were more satisfied with nursing. These may be patients admitted in  
30  
31 392 medical wards are affected by chronic diseases, with relatively frequent  
32  
33 393 hospitalization, more opportunities to contact and communicate with nurses, and more  
34  
35 394 knowledge about the progress and outcome of their own diseases due to long-term  
36  
37 395 illness. These was also revealed in other study which showed patients receiving  
38  
39 396 chronic disease management to report high levels of enablement.<sup>38</sup> Stress from  
40  
41 397 surgery and postoperative recovery will have a significant impact on patient's  
42  
43 398 physiology and psychology. Prevalence of preoperative anxiety ranged between 60–  
44  
45 399 80% in population,<sup>54</sup> and these will lead to an increase in patient's demand for nursing  
46  
47 400 services and the expectation of the quality of nursing service. Any unmet of their  
48  
49 401 expectations during hospitalization will cause dissatisfaction. However, preoperative  
50  
51 402 anxiety is commonly neglected by clinicians.<sup>55</sup> Study has shown that patients who are  
52  
53 403 well-informed and understand the process have a better surgical experience.<sup>37</sup>  
54  
55  
56  
57  
58  
59  
60

1  
2  
3 404 However, these may not did well in our study as patients with surgery showed less  
4  
5 405 satisfied with nursing services. It is suggested that patients need to be assessed  
6  
7 406 regularly for anxiety during the preoperative visit and appropriate anxiety reducing  
8  
9 407 methods should be introduced. Nursing staff should attach importance to nurse-patient  
10  
11 408 communication through assessing patient needs to provide health related information  
12  
13 409 and care services so as to meet patients' needs, increasing their satisfaction.  
14  
15  
16  
17

18 410 Another aspect in this study is that patients with previous history of  
19  
20 411 hospitalisation were found to be more satisfied than their counter parts, similar result  
21  
22 412 was found in other study conducted in Ethiopia<sup>35</sup> and China.<sup>20</sup> This could be because  
23  
24 413 patients who are hospitalized for first time are unfamiliar with nursing staff and  
25  
26 414 hospital environment. They may have more requirements in communication with  
27  
28 415 nurse regarding their disease and nursing services. For patients with previous history  
29  
30 416 of admission, they have a certain understanding of their own diseases and health  
31  
32 417 conditions, and are familiar with the hospital environment and the nurses in-charge,  
33  
34 418 and have a stronger sense of security than patients hospitalized for the first time. Our  
35  
36 419 finding also showed patients who knew their nurse in-charge were significantly  
37  
38 420 satisfied with nursing than those who were not. Study showed patients receiving  
39  
40 421 continuity of care with the same nurse were more satisfied than those who not.<sup>29</sup> The  
41  
42 422 findings provide evidence for the value of nursing in nursing practice. Patients  
43  
44 423 require more individualized care from nurses regarding education, communication  
45  
46 424 and comfort<sup>2</sup> which will improve their well-being through reducing anxiety and  
47  
48 425 depression, and also indirectly, by building trust and social support.<sup>56</sup>  
49  
50  
51  
52  
53  
54

55 426 Research shows that nurses' work experience is related to patient satisfaction. So  
56  
57 427 it is helpful to provide guidance for rational allocation of nursing human resources to  
58  
59 428 discuss whether the composition of professional titles affect patient satisfaction.  
60



1  
2  
3 429 Tarja's research shows that the working years of nurses are positively correlated with  
4  
5 430 satisfaction.<sup>57</sup> In China, the level of nurses is divided into professional titles which  
6  
7 431 correspond to junior(1-5), intermediate(5-10), and senior(more than 10 years). The  
8  
9 432 more nurses with solid professional knowledge and rich working experience among  
10  
11 433 nursing staff, the better the effect of nursing work.<sup>20</sup>Research by Wang shows that  
12  
13 434 patients' satisfaction with nursing professional skills is positively correlated with the  
14  
15 435 proportion of nurses working for more than 5 years, and satisfaction with health  
16  
17 436 education is positively correlated with the proportion of competent nurses.<sup>28</sup>Han's  
18  
19 437 survey shows that patients are most satisfied with nurses who have worked for 2-5  
20  
21 438 years.<sup>58</sup> Our findings also showed the same as the patients in-charged by junior nurse  
22  
23 439 who worked as nurse for less than 5 years were more satisfied than those by senior.  
24  
25 440 The reason may be that nurses who have worked for more than 5 years have rich  
26  
27 441 clinical experience and better operating skills, but most of them have a sense of job  
28  
29 442 burnout, which has a negative impact on patient satisfaction.<sup>58</sup>On the other hand, due  
30  
31 443 to the different division of labor in GPH, nurses working for less than 5 years are  
32  
33 444 mainly engaged in first-line clinical nursing, while senior nurses are engaged in some  
34  
35 445 work related to ward organization and management. Therefore, senior nurses have  
36  
37 446 less communication with patients, thus affecting patients' satisfaction with their work.  
38  
39 447 It indicated that nurse-patient communication plays an important role in the  
40  
41 448 evaluation of patients' satisfaction with nursing work.

## 449 **Conclusion**

450 In conclusion, the current study explored the level of patient satisfaction with nursing  
451 services and its associated factors. It shows that the care needs of hospitalized patients  
452 are still not satisfied to some extent. Meanwhile, patients' married status, history of

1  
2  
3 453 hospitalization and surgery, professional title of in-charged nurses when providing  
4  
5 454 care are main factors effecting patients satisfaction with nursingcare. The current  
6  
7 455 finding will have direct implication towards nurse professionals and nursing  
8  
9 456 administrators. Nurses should establish a good relationship with patients through  
10  
11 457 more communication. In daily nursing work, nurses should formulate corresponding  
12  
13 458 nursing plans according to the personal characteristics and care needs of patients so as  
14  
15 459 to sufficiently meet patients' expectations.

16  
17 460 Of course, besides nursing, there are many factors that will affect the patient's  
18  
19 461 satisfaction, including patient staffing ratio, the use of health information technology,  
20  
21 462 the amount of surgery in the hospital and the health teaching situation. Based on our  
22  
23 463 experience, we suggest to conduct interviews with patient as a first step to learn what  
24  
25 464 patients are most concerned with when seeking nursing services.

26  
27  
28  
29  
30  
31 465

32  
33  
34 466

35  
36  
37 467

#### 38 39 40 468 **List of abbreviations**

41  
42  
43 469 GPH: Gansu Provincial Hospital.

44  
45 470 NSNS: Newcastle Satisfaction with Nursing Scale.

46  
47  
48 471

#### 49 50 472 **Declarations**

51  
52  
53 473 **Ethics approval :** This study was approved by Gansu Provincial Hospital's Ethic  
54  
55 474 Commission.

56  
57  
58 475 **Consent for publication:** Not applicable.

1  
2  
3  
4 476 **Availability of data and material** : The datasets used and/or analysed during the  
5  
6  
7 477 current study are available from the corresponding author on reasonable request.  
8  
9

10 478 **Competing interests** : The authors declare that they have no competing interests  
11  
12  
13

14 479 **Funding**: This study is funded by Gansu provincial hospital fund(17GSSY1-5). The  
15  
16  
17 480 funding has no role in in the design of the study and collection, analysis, and  
18  
19 481 interpretation of data and in writing the manuscript.  
20  
21  
22

23 482 **Authors' contributions** : YLM and WXY performed the survey. WJC analyzed and  
24  
25  
26 483 interpreted the patient data regarding satisfaction and effective factors. ZJX  
27  
28 484 performed the was a major contributor in writing the manuscript. DJ and SWJ  
29  
30 485 collected data. All authors read and approved the final manuscript.  
31  
32  
33

34 486 **Acknowledgements**: We thank staff nurse Gao JX and Wen YJ's surpporting in the  
35  
36 487 questionnaire survey.  
37  
38  
39

40 488  
41  
42

43 489  
44  
45  
46

47 490  
48  
49

50 491  
51  
52  
53

54 492  
55  
56

57 493  
58  
59  
60

494 **References**

- 495 1. [Swarupa I](#), [Hennb CM](#), [Gulotta LV](#), [Frank Henn III R](#), [Noseworthy TW](#).  
496 Patient expectations and satisfaction in orthopaedic surgery: A review of the  
497 literature. *Journal of Clinical Orthopaedics and Trauma* 2019; 10(4):755–760. DOI:  
498 <https://doi.org/10.1016/j.jcot.2018.08.008>.
- 499 2. [Berkowitz B](#). The Patient Experience and Patient Satisfaction: Measurement of a  
500 Complex Dynamic. *Online J Issues Nurs.* 2016;21(1):1. doi: 10.3912/OJIN.  
501 [Vol21No01Man01](#).
- 502 3. [Ahmed S](#), [Miller J](#), [Burrows JF](#), [Bertha BK](#), [Rosen P](#). Evaluation of patient  
503 satisfaction in pediatric dermatology. *Pediatr Dermatol.* 2017;34(6):668-672. doi:  
504 10.1111/pde.13294.
- 505 4. [Blank FS](#), [Tobin J](#), [Jaouen M](#), [Smithline E](#), [Tierney H](#), [Visintainer P](#). A comparison  
506 of patient and nurse expectations regarding nursing care in the emergency  
507 department. *J Emerg Nurs.* 2014;40(4):317-22. doi: 10.1016/j.jen.2013.02.010.
- 508 5. [Kol E](#), [Arıkan F](#), [İlaslan E](#), [Akıncı MA](#), [Koc MC](#). A quality indicator for the  
509 evaluation of nursing care: determination of patient satisfaction and related factors  
510 at a university hospital in the Mediterranean Region in Turkey. *Collegian*  
511 2018;25:51–56. <https://doi.org/10.1016/j>.
- 512 6. [Al-Abri R](#), [Al-Balushi A](#). Patient satisfaction survey as a tool towards quality  
513 improvement. *Oman Med J.* 2014;29(1):3-7. doi: 10.5001/omj.2014.02.
- 514 7. [Seeber R](#). The kind peace of mind culture" improves patient satisfaction. *Rehabil*  
515 *Nurs.* 2012; 37(6):286-91. doi: 10.1002/rnj.030.
- 516 8. [Risser NL](#). Development of an instrument to measure patient satisfaction with nurse  
517 and nursing care in primary care settings. *Nursing Research*, 1975, 24:45-52.
- 518 9. [Eriksen LR](#). Patient satisfaction with nursing care: concept satisfaction. *Journal of*  
519 *Nursing Measurement* 1995;3:59-76.
- 520 10. American Nurses Association. Quality Indicators for Acute Care Settings.  
521 *Healthcare Benchmarks*, 1999;12:138-139.

- 1  
2  
3 522 11. Davins J, Gens M, Pareja C, Guzmán R, Marquet R, Vallès R. El modelo de  
4 523 acreditación de atención primaria de Catalunya: un modelo válido. *Med Clin*  
5 524 (*Barc*) 2014; 143: 74–80. doi: 10.1016/j.medcli.2014.07.015.
- 6  
7  
8  
9 525 12. ANCC. American Nurses Credentialing Center. Magnet Recognition Program  
10 526 Model, <https://www.nursingworld.org/organizational-programs/magnet/> (2017,  
11 527 accessed 17 February 2018).
- 12  
13  
14 528 13. Ahmed T, Assefa N, Demisie A, Kenay A. Levels of Adult Patients' Satisfaction  
15 529 with Nursing Care in Selected Public Hospitals in Ethiopia. *International Journal*  
16 530 *of Health Sciences* 2014;8(4):371-379.
- 17  
18  
19 531 14. Zun AB, Ibrahim MI, Hamid AA. Level of Satisfaction on Service Quality  
20 532 Dimensions Based on SERVQUAL Model Among Patients Attending 1 Malaysia  
21 533 Clinic in Kota Bharu, Malaysia. *Oman Med J*. 2018; 33(5): 416–  
22 534 422. doi: 10.5001/omj.2018.76.
- 23  
24  
25 535 15. Nazuk A, Shabbir J, Khan AH. A comparative survey for assessing Rashidabad  
26 536 city hospitals quality with District Headquarter Hospital. *J Pak Med*  
27 537 *Assoc*. 2018;68(7):1084-1089.
- 28  
29  
30 538 16. Hemadeh R, Hammoud R, Kdouh O, Jaber T, Ammar L. Patient satisfaction with  
31 539 primary healthcare services in Lebanon. *Int J Health Plann Manage*. 2018;26. doi:  
32 540 10.1002/hpm.2659.
- 33  
34  
35 541 17. Duan M, Li D, Dong X. Analysis of job satisfaction among medical staff of public  
36 542 hospitals in Xingjiang. *J Xinjiang Med Univ*. 2015; 38: 635–637.
- 37  
38  
39 543 18. Ministry of Health (MoH). China Health Statistical Yearbook; Press of Peking  
40 544 Union Medical College: Beijing, China, 2017.
- 41  
42  
43 545 19. Wang S, Rui J, Ke X, Dai L, Xing H, Li Z. Job satisfaction survey among 580  
44 546 medical staff in public hospitals in a city. *Hei Long Jiang Med J*. 2015; 37: 510–  
45 547 514.
- 46  
47  
48 548 20. MoH. Ministry of Health Releases Quality Care Service Standards to Strengthen  
49 549 Hospital Clinical Care. [http://www.china.com.cn/policy/txt/2010-](http://www.china.com.cn/policy/txt/2010-12/23/content_21604283.htm)  
50 550 [12/23/content\\_21604283.htm](http://www.china.com.cn/policy/txt/2010-12/23/content_21604283.htm).
- 51  
52  
53 551 21. The National Nursing Development Plan (2016-2020), National Health  
54 552 Commission of the People's Republic of China, 2016.
- 55  
56  
57  
58  
59  
60

- 1  
2  
3 553 22. Guo YH,Jiao J,Zheng XJ,Liu HP.A survey of inpatient satisfaction with nursing  
4  
5 554 care in 24 districts of China(Chinese).*Chinese Journal of Nursing* 2008,43(4) :  
6  
7 555 293-298.  
8  
9 556 23.Nie SM. Study on inpatient satisfaction with nursing and influencing factors in  
10  
11 557 some second A hospitals(Chinese). Master thesis, Shandong University, 2014.  
12  
13 558 24.Guo M. A Survey on Inpatient Satisfaction and Influence Factors Analysis in a  
14  
15 559 Tertiary Hospital,Master thesis, Dalian Medical University. 2015.  
16  
17 560 25.Jiao J. Inpatient satisfaction with nursing care and its influencing factors in 3-A-  
18  
19 561 Grade general hospitals in Beijing(Chinese). Beijing Xiehe Medical  
20  
21 562 University,thesis,2009.  
22  
23 563 26.Fang PP,Ye Q,Li YX,Wang ZN,Miu Y,Xu HB.Analysis on Workplace Violence in  
24  
25 564 Hospital from Nurses' Perspective and Countermeasure(Chinese).  
26  
27 565 *Chinese Health Service Management* 2016;33(4):255-258.  
28  
29 566 27. Zou QH. Research on the Current Situation and Risk Factors of Workplace  
30  
31 567 Violence of Nurses in Level C Hospitals -Taking 3 Level C Hospitals as  
32  
33 568 Examples(Chinese). Beijing University of Chinese Medicine, Master thesis,2018.  
34  
35 569 28.Wang C, Sun CH. Impacts of capability for work, mental health, and coping style  
36  
37 570 of nurses on hospital workplace violence(Chinese). *Chinese Journal of Public*  
38  
39 571 *health* 2015;23(7):941-945.  
40  
41 572 29.ZhangD,Lu D,Shi Y,Xie FZ,Wang JH,Xie YJ,Zhang SE,Sun T. Impact of Patients  
42  
43 573 Violence in Public Hospital on Job Burnout of Nurses(Chinese). *Chinese Journal of*  
44  
45 574 *Hospital Administration*2016;36(9):69-71.  
46  
47 575 30.National Economic Ranking of Provinces in China, 2018. Beijing Youth  
48  
49 576 Daily.2019-02-11.[http://www.sohu.com/a/307360333\\_120060910](http://www.sohu.com/a/307360333_120060910).  
50  
51 577 31.Hu L.Investigation on Satisfaction of Inpatients in a Hospital in Qingyang City,  
52  
53 578 Gansu Province, China.Western traditional Chinese medicine. 2014;11:87-90.  
54  
55 579 32.Xing Y, Tang R, Du HF, Xu HR. Satisfactory Degree of Inpatients in Some  
56  
57 580 Hospitalsl in Northwest Region to Nursing Services.Chinese health industry,  
58  
59 581 2016;06(c):67-70.  
60  
582 33.Thomas LH, McColl E, Priest J, Bond S, Boys RJ. Newcastle satisfaction with  
583  
584 scales: an instrument for quality assessments of nursing care. *Quality in Health*  
*Care*1996; 5(2): 67-72.

- 1  
2  
3 585 34.Khan M, Hassan R, Anwar S, Babar TS. Patient Satisfaction with Nursing Care.  
4 586 *Rawal Medical Journal* 2007; 32(1): 28-30.
- 5  
6 587 35.Sharew NT, Bizuneh HT, Assefa HK, Habtewold TD. Investigating admitted  
7 588 patients' satisfaction with nursing care at Debre Berhan Referral Hospital in  
8 589 Ethiopia: a cross-sectional study. *BMJ Open* 2018;8(5):e021107. doi:  
9 590 10.1136/bmjopen-2017-021107.
- 10  
11 591 36.Jiang S.The Relationship between Face-to-Face and Online Patient-Provider  
12 592 Communication: Examining the Moderating Roles of Patient Trust and Patient  
13 593 Satisfaction. *Health Commun.* 2019; 1:1-9. doi: 10.1080/10410236.2018.1563030.
- 14  
15 594 37.Sillero A, Zabalegui A. Satisfaction of surgical patients with perioperative nursing  
16 595 care in a Spanish tertiary care hospital. *SAGE Open Med.* 2018; 6:  
17 596 2050312118818304. doi: 10.1177/2050312118818304.
- 18  
19 597 38.Desborough J,Phillips C,Banfield M,Bagheri N,Mills J. Impact of nursing care in  
20 598 Australian general practice on the quality of care: A pilot of the Patient Enablement  
21 599 and Satisfaction Survey (PESS).*Collegian*2015;22(2): 207-214.  
22 600 <https://doi.org/10.1016/j.colegn.2014.10.003>.
- 23  
24 601 39.Tsai TC, Orav EJ, Jha AK. Patient satisfaction and quality of surgical care in US  
25 602 hospitals.*Ann Surg.* 2015; 261(1):2-8.
- 26  
27 603 40.Doyle C, Lennox L, Bell D. A systematic review of evidence on the links  
28 604 between patient experience and clinical safety and effectiveness.*BMJ Open* 2013;  
29 605 3(1): e001570. doi: 10.1136/bmjopen-2012-001570.
- 30  
31 606 41. Tobis S, Wieczorowska-Tobis K, Talarska D, Pawlaczyk M, Suwalska A. Needs  
32 607 of older adults living in long-term care institutions: an observational study using  
33 608 Camberwell Assessment of Need for the Elderly. *Clinical Interventions in Aging*  
34 609 2018,13: 2389–2395. doi: 10.2147/CIA.S145937.
- 35  
36 610 42.Nski MW, Ksykiewicz-Dorota A, Fidecki WB.Scope of Nursing Care in Polish  
37 611 Intensive Care Units. *BioMed Research International* 2013,4:1-9.  
38 612 <http://dx.doi.org/10.1155/2013/463153>.
- 39  
40 613 43.Adugbire1 A, Aziato L.Surgical patients' perspectives on nurses' education on  
41 614 post-operative care and follow up in Northern Ghana Bernard. *BMC Nursing* 2018;  
42 615 17:29. <https://doi.org/10.1186/s12912-018-0299-6>.
- 43  
44 616 44.Lee TL, Crouse M, Gipson K.No-Pass Zone: Multidisciplinary Approach to  
45 617 Responding to Patient Needs. *J Nurs Care Qual.* 2016; 31(4):327-34. doi:  
46 618 10.1097/NCQ.000000000000179.

- 1  
2  
3 619 45. Milutinovic D, Simin D, Brkic N, Brkic S. The patient satisfaction with nursing  
4 care quality: the psychometric study of the Serbian version of PSNCQ  
5 620 care quality: the psychometric study of the Serbian version of PSNCQ  
6 621 questionnaire. *Scand J Caring Sci.* 2012;26(3):598–606. doi: 10.1111/j.1471-  
7 622 6712.2012.00969.x.
- 8  
9  
10 623 46. Belayneh M. Inpatient satisfaction and associated factors towards nursing care at  
11 624 Felegehiwot Referral Hospital. Northwest Ethiopia: Amhara Regional State.  
12 Retrieved October, 2016. from <http://www.gjmedph.com/uploads/O7-Vo5No3.pdf>.  
13 625  
14 626 47. Chan B, Goldman LE, Sarkar U, Schneidermann M, Kessell E, Guzman D,  
15 627 Critchfield J, Kushel M. The Effect of a Care Transition Intervention on the Patient  
16 628 Experience of Older Multi-Lingual Adults in the Safety Net: Results of a  
17 629 Randomized Controlled Trial. *J Gen Intern Med.* 2015; 30(12):1788-94. doi:  
18 630 10.1007/s11606-015-3362-y.
- 19 631 48. Patient Information Forum. Making the case for information: the evidence for  
20 632 investing in high quality information for patients and the public. Patient  
21 633 Information Forum, 2013. [https://www.pifonline.org.uk/wp-content/uploads/2013](https://www.pifonline.org.uk/wp-content/uploads/2013/05/PiF-full-report-FINAL-new.pdf)  
22 634 [/05/PiF-full-report-FINAL-new.pdf](https://www.pifonline.org.uk/wp-content/uploads/2013/05/PiF-full-report-FINAL-new.pdf). Accessed 21 July 2016.
- 23 635 49. Amutio-Kareaga A, García-Campayo J, Delgado LC, Hermosilla D, Martínez-  
24 636 Taboada C. Improving Communication between Physicians and Their Patients  
25 637 through Mindfulness and Compassion-Based Strategies: A Narrative Review. *J*  
26 638 *Clin Med.* 2017; 6(3): 33. doi: 10.3390/jcm6030033.
- 27 639 50. Baummer-Carr A, Nicolau DP. The challenges of patient satisfaction: influencing  
28 640 factors and the patient - provider relationship in the United States. *Expert Rev Anti*  
29 641 *Infect Ther.* 2017;15(10):955-962. doi: 10.1080/14787210.2017.1378097.
- 30 642 51. Zarei E, Daneshkohan A, Khabiri R, Arab M. The Effect of Hospital Service  
31 643 Quality on Patient's Trust. *Iran Red Crescent Med J.* 2015; 17(1): e17505. DOI:  
32 644 10.5812/ircmj.17505.
- 33 645 52. Liu Y, Aunguroch Y. Factors influencing nurse-assessed quality nursing care: A  
34 646 cross-sectional study in hospitals. *J Adv Nurs.* 2018;74(4):935-945. doi:  
35 647 10.1111/jan.13507.
- 36 648 53. Kasa AS, Gedamu H. Predictors of adult patient satisfaction with nursing care in  
37 649 public hospitals of Amhara region, Northwest Ethiopia. *BMC Health Serv Res.*  
38 650 2019; 19: 52. doi: 10.1186/s12913-019-3898-3.
- 39 651 54. Woldegerima Y. B. Fitwi G. L. Yimer H. T. Hailekiros A. G. Prevalence and factors  
40 652 associated with preoperative anxiety among elective surgical patients at University



- 1  
2  
3 653 of Gondar Hospital. Gondar, Northwest Ethiopia, A cross-sectional study.  
4 654 *International Journal of Surgery Open* 2018;10: 21-29. <https://doi.org/10.1016>  
5 655 [/j.ijso.2017.11.001](https://doi.org/10.1016/j.ijso.2017.11.001).  
6  
7  
8 656 55.Pereira L, Figueiredo-Braga M, Carvalho IP. Preoperative anxiety in ambulatory  
9 657 surgery: The impact of an empathic patient-centered approach on psychological and  
10 658 clinical outcomes. *Patient Educ Couns*. 2016; 99(5):733-8. doi: 10.1016/j.pec.  
11 659 2015.11.016.  
12  
13 660 56.Greenhalgh J, Gooding K, Gibbons E, Dalkin S, Wright J, Valderas J, Black N.  
14 661 How do patient reported outcome measures (PROMs) support clinician-patient  
15 662 communication and patient care? A realist synthesis. *J Patient Rep Outcomes*.  
16 663 2018;2:42. doi: 10.1186/s41687-018-0061-6.  
17 664 57.Tarja TH, Tarja K, Piiljo P. Patient Satisfaction as a Positive Nursing Outcome.  
18 665 *Journal of Nursing Care Quality*, 2007;23(1):58-65.  
19 666 58.Han CH, Connolly PM, Canham D. Measuring patient satisfaction as an outcome  
20 667 of nursing care at a teaching hospital of southern Taiwan. *J Nurs Care Qual*.  
21 668 2003;18(2):143-50.  
22  
23  
24  
25  
26  
27  
28  
29  
30  
31 669

Review Only

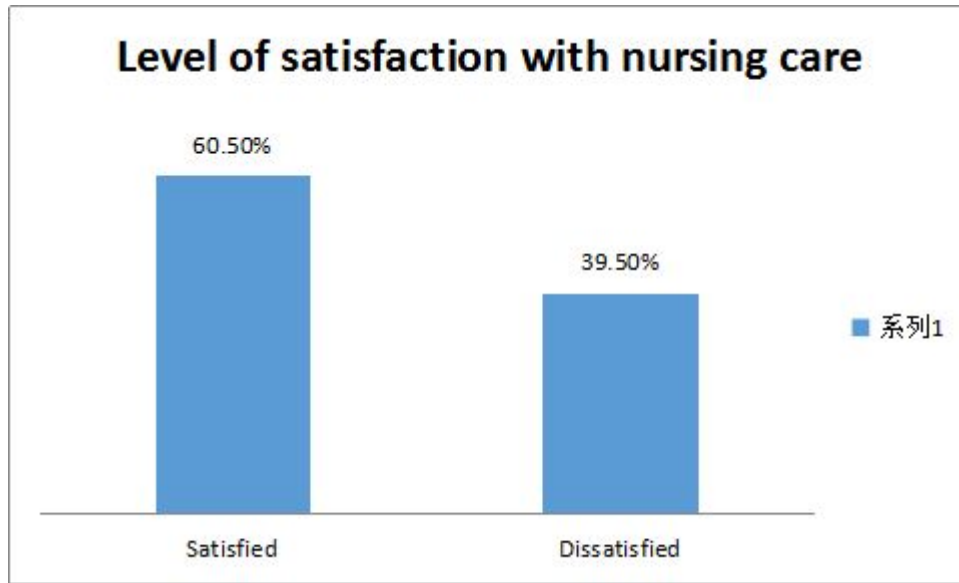

Figure 1. Level of inpatients satisfaction with nursing services in a tertiary hospital of Gansu, China

STROBE Statement—Checklist of items that should be included in reports of *cross-sectional studies*

|                           | Item No | Recommendation                                                                                                                                                                                    |                                                   |
|---------------------------|---------|---------------------------------------------------------------------------------------------------------------------------------------------------------------------------------------------------|---------------------------------------------------|
| <b>Title and abstract</b> | 1       | (a) Indicate the study's design with a commonly used term in the title or the abstract<br>(b) Provide in the abstract an informative and balanced summary of what was done and what was found     | Title, paragraph 1-2<br>Abstract, paragraph 30-50 |
| <b>Introduction</b>       |         |                                                                                                                                                                                                   |                                                   |
| Background/rationale      | 2       | Explain the scientific background and rationale for the investigation being reported                                                                                                              | Background, paragraph 79-131                      |
| Objectives                | 3       | State specific objectives, including any prespecified hypotheses                                                                                                                                  | Background, paragraph 132-133                     |
| <b>Methods</b>            |         |                                                                                                                                                                                                   |                                                   |
| Study design              | 4       | Present key elements of study design early in the paper                                                                                                                                           | Study design, paragraph 150                       |
| Setting                   | 5       | Describe the setting, locations, and relevant dates, including periods of recruitment, exposure, follow-up, and data collection                                                                   | Setting, paragraph 136-138                        |
| Participants              | 6       | (a) Give the eligibility criteria, and the sources and methods of selection of participants                                                                                                       | sample, paragraph 153-171                         |
| Variables                 | 7       | Clearly define all outcomes, exposures, predictors, potential confounders, and effect modifiers. Give diagnostic criteria, if applicable                                                          | paragraph 177-186                                 |
| Data sources/measurement  | 8*      | For each variable of interest, give sources of data and details of methods of assessment (measurement). Describe comparability of assessment methods if there is more than one group              | paragraph 192-201                                 |
| Bias                      | 9       | Describe any efforts to address potential sources of bias                                                                                                                                         | paragraph 165-171                                 |
| Study size                | 10      | Explain how the study size was arrived at                                                                                                                                                         | Sample, paragraph 153-160                         |
| Quantitative variables    | 11      | Explain how quantitative variables were handled in the analyses. If applicable, describe which groupings were chosen and why                                                                      | Data Analysis, paragraph 158-161                  |
| Statistical methods       | 12      | (a) Describe all statistical methods, including those used to control for confounding                                                                                                             | Data Analysis, paragraph 203                      |
|                           |         | (b) Describe any methods used to examine subgroups and interactions                                                                                                                               | Data Analysis, paragraph 204-209                  |
|                           |         | (c) Explain how missing data were addressed                                                                                                                                                       | N/A                                               |
|                           |         | (d) If applicable, describe analytical methods taking account of sampling strategy                                                                                                                | Sample, paragraph 153-160                         |
|                           |         | (e) Describe any sensitivity analyses                                                                                                                                                             | N/A                                               |
| <b>Results</b>            |         |                                                                                                                                                                                                   |                                                   |
| Participants              | 13*     | (a) Report numbers of individuals at each stage of study—eg numbers potentially eligible, examined for eligibility, confirmed eligible, included in the study, completing follow-up, and analysed | General characteristics, paragraph 214-222        |
|                           |         | (b) Give reasons for non-participation at each stage                                                                                                                                              | N/A                                               |
|                           |         | (c) Consider use of a flow diagram                                                                                                                                                                | N/A                                               |
| Descriptive data          | 14*     | (a) Give characteristics of study participants (eg demographic, clinical, social) and information on exposures and potential confounders                                                          | General characteristics, paragraph 214-222        |
|                           |         | (b) Indicate number of participants with missing data for each variable of interest                                                                                                               | Result, paragraph 224-229                         |

|                          |     |                                                                                                                                                                                                              |                               |
|--------------------------|-----|--------------------------------------------------------------------------------------------------------------------------------------------------------------------------------------------------------------|-------------------------------|
| Outcome data             | 15* | Report numbers of outcome events or summary measures                                                                                                                                                         |                               |
| Main results             | 16  | (a) Give unadjusted estimates and, if applicable, confounder-adjusted estimates and their precision (eg, 95% confidence interval). Make clear which confounders were adjusted for and why they were included | Result, paragraph 234-241     |
|                          |     | (b) Report category boundaries when continuous variables were categorized                                                                                                                                    | Result, paragraph 234-241     |
|                          |     | (c) If relevant, consider translating estimates of relative risk into absolute risk for a meaningful time period                                                                                             | N/A                           |
| Other analyses           | 17  | Report other analyses done—eg analyses of subgroups and interactions, and sensitivity analyses                                                                                                               | N/A                           |
| <b>Discussion</b>        |     |                                                                                                                                                                                                              |                               |
| Key results              | 18  | Summarise key results with reference to study objectives                                                                                                                                                     | Discussion, paragraph 251-253 |
| Limitations              | 19  | Discuss limitations of the study, taking into account sources of potential bias or imprecision. Discuss both direction and magnitude of any potential bias                                                   | paragraph 54-60               |
| Interpretation           | 20  | Give a cautious overall interpretation of results considering objectives, limitations, multiplicity of analyses, results from similar studies, and other relevant evidence                                   | Discussion, paragraph 249-342 |
| Generalisability         | 21  | Discuss the generalisability (external validity) of the study results                                                                                                                                        | Conclusion, paragraph 334-350 |
| <b>Other information</b> |     |                                                                                                                                                                                                              |                               |
| Funding                  | 22  | Give the source of funding and the role of the funders for the present study and, if applicable, for the original study on which the present article is based                                                | Funding, paragraph 368-370    |

\*Give information separately for exposed and unexposed groups.

**Note:** An Explanation and Elaboration article discusses each checklist item and gives methodological background and published examples of transparent reporting. The STROBE checklist is best used in conjunction with this article (freely available on the Web sites of PLoS Medicine at <http://www.plosmedicine.org/>, Annals of Internal Medicine at <http://www.annals.org/>, and Epidemiology at <http://www.epidem.com/>). Information on the STROBE Initiative is available at [www.strobe-statement.org](http://www.strobe-statement.org).

# BMJ Open

## Inpatients' satisfaction with nursing care in the backward region: a cross-sectional study from Northwestern China

|                                 |                                                                                                                                                                                                                                                                                                                                                                                                |
|---------------------------------|------------------------------------------------------------------------------------------------------------------------------------------------------------------------------------------------------------------------------------------------------------------------------------------------------------------------------------------------------------------------------------------------|
| Journal:                        | <i>BMJ Open</i>                                                                                                                                                                                                                                                                                                                                                                                |
| Manuscript ID                   | bmjopen-2019-034196.R2                                                                                                                                                                                                                                                                                                                                                                         |
| Article Type:                   | Original research                                                                                                                                                                                                                                                                                                                                                                              |
| Date Submitted by the Author:   | 03-Mar-2020                                                                                                                                                                                                                                                                                                                                                                                    |
| Complete List of Authors:       | Zhang, J ; Gansu Provincial Hospital, Nursing Department<br>Yang, Limei; Gansu Provincial Hospital, In-Patient services Center<br>Wang, Xiaoying; Gansu Provincial Hospital, Anorectal Department<br>Dai, Jiao; Gansu Provincial Hospital, Nursing Department<br>Shan, Wenjing; Gansu Provincial Hospital, Nursing Department<br>Wang, Jiancheng; Gansu provincial Hospital, Elder Department; |
| <b>Primary Subject Heading</b>: | Health services research                                                                                                                                                                                                                                                                                                                                                                       |
| Secondary Subject Heading:      | Epidemiology, Health services research, Nursing                                                                                                                                                                                                                                                                                                                                                |
| Keywords:                       | EPIDEMIOLOGY, SOCIAL MEDICINE, STATISTICS & RESEARCH METHODS                                                                                                                                                                                                                                                                                                                                   |
|                                 |                                                                                                                                                                                                                                                                                                                                                                                                |

SCHOLARONE™  
Manuscripts



I, the Submitting Author has the right to grant and does grant on behalf of all authors of the Work (as defined in the below author licence), an exclusive licence and/or a non-exclusive licence for contributions from authors who are: i) UK Crown employees; ii) where BMJ has agreed a CC-BY licence shall apply, and/or iii) in accordance with the terms applicable for US Federal Government officers or employees acting as part of their official duties; on a worldwide, perpetual, irrevocable, royalty-free basis to BMJ Publishing Group Ltd ("BMJ") its licensees and where the relevant Journal is co-owned by BMJ to the co-owners of the Journal, to publish the Work in this journal and any other BMJ products and to exploit all rights, as set out in our [licence](#).

The Submitting Author accepts and understands that any supply made under these terms is made by BMJ to the Submitting Author unless you are acting as an employee on behalf of your employer or a postgraduate student of an affiliated institution which is paying any applicable article publishing charge ("APC") for Open Access articles. Where the Submitting Author wishes to make the Work available on an Open Access basis (and intends to pay the relevant APC), the terms of reuse of such Open Access shall be governed by a Creative Commons licence – details of these licences and which [Creative Commons](#) licence will apply to this Work are set out in our licence referred to above.

Other than as permitted in any relevant BMJ Author's Self Archiving Policies, I confirm this Work has not been accepted for publication elsewhere, is not being considered for publication elsewhere and does not duplicate material already published. I confirm all authors consent to publication of this Work and authorise the granting of this licence.

1  
2  
3  
4  
5  
6  
7  
8  
9  
10  
11  
12  
13  
14  
15  
16  
17  
18  
19  
20  
21  
22  
23  
24  
25  
26  
27  
28  
29  
30  
31  
32  
33  
34  
35  
36  
37  
38  
39  
40  
41  
42  
43  
44  
45  
46  
47  
48  
49  
50  
51  
52  
53  
54  
55  
56  
57  
58  
59  
60

1 **Inpatients' satisfaction with nursing care in the backward region:**  
2 **across-sectional study from Northwestern China**

3 Zhang Juxia RN<sup>1</sup>, Yang Limei RN<sup>2</sup>, Wang Xiaoying RN<sup>3</sup>, Dai Jiao<sup>1</sup>, Shan Wenjing<sup>1</sup>, Wang  
4 Jiancheng Prof. PhD<sup>4\*</sup>

5  
6  
7 1 Nursing Department, Gansu Provincial Hospital, Lanzhou, China

8 Email: juxia2008@hotmail.com

9 2 In-Patient services Center, Gansu Provincial Hospital, Lanzhou, China

10 Email: YangLM@163.com

11 3 Anorectal Department, Gansu Provincial Hospital, Lanzhou, China

12 Email: 27385673@qq.com

13 4 Elder Department, Gansu Provincial Hospital, Lanzhou, China

14 Email: 364954672@qq.com

15  
16  
17 \*Corresponding author:

18 Wang Jiancheng, Prof. PhD. Elder Department, Gansu Provincial Hospital, Lanzhou, China

19 Email: 364954672@qq.com

## 29 Abstract

30 **Objectives** The aim of the study was to examine the level of patient satisfaction with  
31 nursing care and identify the factors affecting satisfaction from the in-patients'  
32 viewpoints in backward region of China.

33 **Design** This was a cross-sectional study.

34 **Setting** The study was conducted at a tertiary hospital located in Northwest China.

35 **Participants** Patients who were admitted to the ward for at least 48 hours were  
36 chosen to undertake the survey.

37 **Primary outcome measure** The Newcastle Satisfaction with Nursing care Scale was  
38 used. Data were collected from 219 patients.

39 **Results** The overall inpatient satisfaction with nursing care was  $78.15 \pm 4.74$ . Patients  
40 were more satisfied with nurses who respected their privacy and treated them as  
41 individuals (67.7%). Patients were least satisfied with the type of information nurses  
42 gave to them (11.7%) and awareness of their needs. Patients who were married,  
43 having a history of hospitalization, surgery and in-charged by junior nurses had higher  
44 satisfaction with nursing.

45 **Conclusions** The overall level of patient satisfaction was moderates. There is a need  
46 for nurses to be aware of patients' individualized care needs and provide more  
47 information. This study may urge hospital administrators, policy makers and nurses  
48 to be more sensitive with patients' married status, history of hospitalization and  
49 surgery, professional title of in-charged nurses when providing care.

50 **Keywords:** Inpatient, Nursing care, Satisfaction, Backward region, China

51

52



### 53 **Strengths and limitations of this study**

- 54 ● This study is the first to evaluate inpatients' satisfaction with nursing care using  
55 NSNS instrument in less developed and more economically burdened Chinese  
56 areas.
- 57 ● The sample of the study was recruited from one hospital in northwest China. As  
58 such, its social background and current situation of healthcare disturbance may be  
59 different from other areas.
- 60 ● The study sample was small, so it is not likely to be representative of the patients  
61 in all Chinese hospitals. Larger samples across multiple sites are needed in future  
62 research.
- 63 ● The study adopted self-reported questionnaires, so all answers were based on the  
64 respondents' own perception. Hence, there is a possibility that their responses  
65 were influenced by social desirability, leading to response bias.

66

67

68

69

70

71

72

73

74

75

76

## 77 **Background**

78 Patient satisfaction have been defined by scholars from different aspects. Swarupa  
79 defined it as people's expectation for health care services due to the requirements of  
80 health, disease, quality of life and other aspects.<sup>1</sup> Berkowitz suggested that patient  
81 satisfaction is an individual's evaluation of the degree to which the medical services  
82 provided are in line with their expectations and preferences.<sup>2</sup> Ahmed believes that  
83 patient satisfaction is the result of patients filtering medical service experience and  
84 evaluating the degree to which medical service experience meets their needs from  
85 their own unique perspective.<sup>3</sup> Among them, most scholars believe that the best  
86 definition of patient satisfaction is the evaluation of medical services by patients  
87 based on the degree to which their expectations are met.<sup>4</sup> Based on this expectation,  
88 the evaluation of patient satisfaction objectively reflect the quality of health care  
89 services which becomes the gold standard and widely used metric to measure hospital  
90 quality management.<sup>5,6</sup>

91 Patient satisfaction with nursing service is an important component of patient  
92 satisfaction.<sup>7</sup> Risser defines patient satisfaction with nursing as the degree to which  
93 the patient's expectation of ideal care is consistent with the actual care.<sup>8</sup> Eriksen  
94 defines it as the subjective evaluation made by patients according to their own  
95 expectations of nursing and their cognitive and emotional reactions to the interaction  
96 of actual receiving nursing services.<sup>9</sup> The American Nurses Association (ANA) is  
97 defined as a patient or his family staff's evaluation of the nursing care received.<sup>10</sup> The  
98 above definitions are slightly different, and the consistent point is that patients'  
99 satisfaction with nursing is a subjective feeling, which is closely related to their  
100 expectation and perception of nursing quality. From the time of admission until  
101 discharge, nurses provide care for patients every day without fail and are involved in

1  
2  
3 102 almost every aspect of patient care. Therefore, as main healthcare providers, nurses  
4  
5 103 have a significant impact upon patients' perceptions about their hospital experience.<sup>7</sup>  
6  
7  
8 104 If healthcare organization managers are able to identify patient expectations, they  
9  
10 105 could accordingly adjust the performance of services that they offer to meet these  
11  
12 106 expectations.<sup>11,12</sup> Therefore, it is urgently needed to carry out surveys in health  
13  
14 107 services to measure patient health care satisfaction constantly, to learn their  
15  
16 108 expectations, suggestions and feedbacks, so as to guide health care workers which  
17  
18 109 items should be prioritized and which require alteration in the service.<sup>13</sup>  
19  
20

21 110 In order to achieve the goal of high-care quality, decision makers should not only  
22  
23 111 know whether the patient is satisfied, but also, more importantly, why the patient is  
24  
25 112 not satisfied. That is, they should identify the factors that affect the patient's  
26  
27 113 satisfaction with nursing services, so as to carry out care that meets patients' needs.  
28  
29 114 According to previous studies, factors such as age,<sup>14,15</sup> gender<sup>15-17</sup>, educational  
30  
31 115 level,<sup>18,19</sup> length of stay, type of admission<sup>20</sup> previous history of admission, patients'  
32  
33 116 income level, type of admission rooms.<sup>21</sup> monthly household income and frequency of  
34  
35 117 admission had significant association with level of satisfaction.<sup>22</sup> To foster better  
36  
37 118 individualized care, the factors influencing hospitalized patients' perception of  
38  
39 119 individualized care should be identified.  
40  
41  
42  
43

44 120 In China, there are 20918 hospitals in different levels with 20 million registered  
45  
46 121 nurses. The average bed to nurse ratio is about 1:0.45. Of them, the 2232 tertiary  
47  
48 122 public hospitals account for only 7.66% of the all-types health facilities, yet provide  
49  
50 123 nearly half (42.5%) of the inpatient care.<sup>23</sup> On average, the rate of one nurse per 1000  
51  
52 124 population was lower than the WHO standard of 2.28 per 1000 population.<sup>24</sup>  
53  
54 125 Excessive workloads lead to lower job satisfaction in nurse staff across tertiary  
55  
56 126 hospitals.<sup>23,25</sup> Under such environments, the patient satisfaction in tertiary hospitals  
57  
58  
59  
60

127 needs more attention. Ministry of Health of China formulated the " Standards for  
 128 Implementing Quality Nursing Services in Hospitals ( Trial )" in 2010, which aimed  
 129 to provide patients with safe and high-quality nursing services.<sup>26</sup> With these  
 130 standards, "high quality nursing service project" was carried out at a national level.  
 131 By the end of 2015, all tertiary hospitals in China had carried out high-quality nursing  
 132 services, with 87.0 % of them being tertiary A-class hospitals and 82.6 % were B-  
 133 class.<sup>27</sup>

134 At present, the survey on the satisfaction of hospitalized patients with nursing  
 135 service in China is confusing. On one hand, patients in different facilities reported  
 136 high satisfaction about nursing service. As show in table 1.

137 Table 1 Outcomes of patients satisfaction in different provinces of China

| author                       | Survey date                                                                                 | Province                      | Hospital included                                | instrument    | satisfaction |       | Effecting factors                                                                                |
|------------------------------|---------------------------------------------------------------------------------------------|-------------------------------|--------------------------------------------------|---------------|--------------|-------|--------------------------------------------------------------------------------------------------|
|                              |                                                                                             |                               |                                                  |               | n            | %     |                                                                                                  |
| Guo YH, et al <sup>28</sup>  | 2007                                                                                        | 24 Provinces                  | 71 Hospitals                                     | Self-designed | 4338         | 93.69 | age, education level                                                                             |
| Jiao J, et al <sup>29</sup>  | 2008                                                                                        | Beijing                       | 4 A-class hospitals                              | NSNS          | 1496         | 82.9  | age, education level health status, department                                                   |
| Fu WJ <sup>30</sup>          | 2010                                                                                        | Henan                         | 1 Children hospital                              | NSNS          | 110          | 85    | age, education level                                                                             |
| Nie SM, et al <sup>31</sup>  | 2013                                                                                        | Shandong                      | 1B-class hospital                                | Self-designed | 626          | 78    | Department, age, education level, occupation, payment method, ADL                                |
| Shan LH, et al <sup>32</sup> | 2013                                                                                        | Heilongjiang                  | 30 Hospitals                                     | CNHSSs        | 1200         | 76    | medical insurance                                                                                |
| Hu <sup>33</sup>             | 2013                                                                                        | Gansu                         | 1A-class hospital                                | Self-designed | 400          | 80.9  | environment                                                                                      |
| Guo M, et al <sup>34</sup>   | 2014                                                                                        | Shandong                      | 1A-class hospital                                | Self-designed | 298          | 79.8  | age, patients' position, culture, income and reason for choosing                                 |
| Xing Y, et al <sup>35</sup>  | 2015                                                                                        | Gansu                         | 1A-class hospital                                | Self-designed | 138          | 82.4  | age, degree of education, average income per person in family, and self-feeling of health status |
| Liu XJ, et al <sup>36</sup>  | 2017                                                                                        | Jiangxi                       | 2 A-class hospital                               | IAPSQGH       | 844          | 82.1  | age, degree of education, average income per person in family                                    |
| Liu JL, et al <sup>37</sup>  | 2019                                                                                        | 11 provinces in Western China | 33 county-level hospitals, 33 township hospitals | CNHSSs        | 9811         | 60    | waiting time, medical expenses                                                                   |
| 138                          | CNHSSs : Questionnaires of the China National Health Service Surveys; IAPSQGH:              |                               |                                                  |               |              |       |                                                                                                  |
| 139                          | Improvement and Assessment of Patient Satisfaction Questionnaire in General Hospitals; ADL: |                               |                                                  |               |              |       |                                                                                                  |
| 140                          | Ability of Daily Life; NSNS: Newcastle Satisfaction with Nursing Scale.                     |                               |                                                  |               |              |       |                                                                                                  |

1  
2  
3 141 These indicated that Chinese nursing service continues to be improved with the  
4  
5 142 implementation of “the high-quality care project”. However, unfaithful reports by the  
6  
7 143 media and continuous occurrence of disputes and violence are inconsistent with the  
8  
9 144 results of the satisfaction survey. An analysis of workplace violence shows that 40.8%  
10  
11 145 of hospital nurses in China have experienced different types of workplace violence.<sup>38</sup>  
12  
13 146 Zou et al study showed there is a high incidence(59.7 %) of workplace violence  
14  
15 147 among nurses in Chinese tertiary hospitals.<sup>39</sup> In Wang et al’s study 6.67% of nurses  
16  
17 148 suffered violence in the workplace.<sup>40</sup>Violence in these workplaces will affect nurses'  
18  
19 149 mental health, leading to job burnout,<sup>41</sup> and thus reduce the quality of nursing  
20  
21 150 services. The frequent occurrence of workplace violence in hospitals directly reflects  
22  
23 151 the dissatisfaction of patients with the quality of medical care. Thus, hospital-specific  
24  
25 152 data are still required to provide evidence for cross-country and cross-cultural  
26  
27 153 comparisons of satisfaction and factors affecting satisfaction using standardized tools.

28  
29 154 Gansu province is located in North-west of China. Affected by region, the  
30  
31 155 development of economy, culture and information is relatively backward. According  
32  
33 156 to China's economic comprehensive competitiveness development report, Gansu  
34  
35 157 province ranks 27th among the 31 provinces in China.<sup>42</sup> With continuous development  
36  
37 158 in the overall scale of hospitals in Gansu, the scope of service is getting larger, and the  
38  
39 159 number of patients received is also gradually increasing. With the continuous  
40  
41 160 improvement of people's requirements for service level, complaints from patients  
42  
43 161 occur frequently<sup>43</sup>. In light of this situation, hospital managers urgently need to  
44  
45 162 understand the gap between patients care needs and the capabilities of the hospital to  
46  
47 163 providing care in a timely and dynamic manner. To our knowledge, this is the first  
48  
49 164 study in Gansu to use Newcastle Satisfaction with Nursing Scale (NSNS) to  
50  
51 165 measure satisfaction with nursing care. Thus, this study has two aims: (1) to assess  
52  
53 166 patient satisfaction with nursing care using NSNS instrument, so as to find out the gap  
54  
55 167 between patients' expectations and the hospital's service provision. (2) to investigate  
56  
57 168 the factors affecting patient satisfaction with nursing care, so as to provide more  
58  
59 169 accurate reference for hospital managers and relevant regulatory agencies.

## 170 **Methods**

### 171 **Study design**

172 This study was a cross-sectional survey held in 2018. For the reporting purpose,

1  
2  
3 173 STROBE(Strengthening the Reporting of Observational Studies in Epidemiology)

4  
5 174 checklist was used in this study.

6  
7  
8 175 **Study setting and the participants**

9  
10 176 This study was conducted at Gansu Provincial Hospital(GPH), a tertiary hospital with  
11  
12 177 1700-beds. The services at GPH include ear, nose and throat, surgery, outpatients  
13  
14 178 clinic, emergency, gynaecology and obstetrics, paediatrics and neonatal intensive care  
15  
16 179 unit, maternal and child health, physiotherapy, dental, radiology, traditional Chinese  
17  
18 180 medicine, rehabilitation, and internal medicine. GPH is also a teaching hospital for  
19  
20 181 nursing, health officer, medicine, midwifery and pharmacy undergraduate and  
21  
22 182 graduate students. The hospital has a total of 4070 employees,1200 of which are  
23  
24 183 nurses who provide health care in 60 nursing units. The hospitalized patients mainly  
25  
26 184 come from residents and the people in the surrounding cities and states. Choosing the  
27  
28 185 hospital to carry out the survey can better understand the expectations of patients from  
29  
30 186 different social strata in Gansu.

31  
32  
33  
34  
35 187 The number of open beds in GPH is about 1500, after excluding departments such  
36  
37 188 as paediatrics, intensive care units, emergency wards and VIP wards (about 200).The  
38  
39 189 population of the study was calculated using the formula  $N = Z^2.P(1-P)/E^2$ .<sup>5</sup> In the  
40  
41 190 formula, the symbols represent the following: a margin of error (E)= 5%.In order to  
42  
43 191 narrow the interval, and make the estimation of effect quantity more accurate, we  
44  
45 192 chose 99% as the confidence level,  $Z=2.58$ . 90% patient satisfaction with nursing  
46  
47 193 care.<sup>16</sup> We calculated the sample using the following: $Z^2.P(1-P)/ E^2= (2.58*2.58).$   
48  
49 194  $0.90(1-0.90)/ (0.05*0.05)= 6.65*0.09/ 0.0025= 239$ .Then we added 20% to the  
50  
51 195 sample size for non-response or for selection bias, thus making the sample size = 288  
52  
53 196 approximately. Patients should meet the following inclusion criteria: (1) $\geq 18$ years old;  
54  
55 197 (2)admitted in the wards at least for 48h; (3)capable of independent communication;  
56  
57  
58  
59  
60

1  
2  
3 198 (3)voluntary participation. Patients were excluded on any one of the following:  
4  
5 199 patients in intensive care unit; pediatric patients; emergency observation ward patients;  
6  
7 200 VIP patients in selected wards. Medical, surgical, gynaecology and obstetrics and ear,  
8  
9 201 nose and throat wards were purposefully selected and based on the calculated sample  
10  
11 202 size, the required number of patients from each ward was proportionally allocated.  
12  
13

14 203 Finally, 291 patients were included for further analysis,32 patients were excluded  
15  
16 204 with 12 of them being younger than 18 years old and 20 who disagreed to participate..  
17  
18

### 19 205 **Instruments**

20 206 The questionnaire included: (1) general demographic characteristics: age, gender,  
21  
22 207 educational status, marital status, monthly family income, history of admission,  
23  
24 208 hospital length of stay, admission ward, professional title of patients' nurse in charge.  
25  
26 209 (2)NSNS checklist. The NSNS was developed by Thomas et al.<sup>44</sup> The scale has been  
27  
28 210 translated into different languages and has been applied in many studies. The Chinese  
29  
30 211 version of the scale was tested for its validity and reliability by Jiao with Cogent  
31  
32 212 Validity index is 0.98 and Cronbach's alpha is 0.97.<sup>29</sup> The NSNS includes two  
33  
34 213 subscales: the Experience of Nursing Care Scale (ENCS) and the Satisfaction with  
35  
36 214 Nursing Care Scale (SNCS). The two subscales can be applied either together or  
37  
38 215 separately. In this study, the SNCS was applied, consisting of a total of 19 items and  
39  
40 216 using a 5-point Likert scale. For assessing the degree of satisfaction, 'not at all',  
41  
42 217 'barely', 'satisfied', 'very', 'completely' scored from 1- 5 respectively. Patient  
43  
44 218 responses across all items are summed and transformed to yield an overall satisfaction  
45  
46 219 score between 0–95, which denotes none or complete satisfaction with all aspects of  
47  
48 220 nursing care.  
49  
50  
51  
52  
53

### 54 221 **Patient and Public Involvement**

55  
56  
57  
58  
59  
60

1  
2  
3 222 Before the survey, the nurse manager explained the purpose of the study. Patients  
4  
5 223 have the right to refuse to participate in the study and to withdraw at any time during  
6  
7 224 the study. Patients are required to provide detailed and accurate information as much  
8  
9 225 as possible during the investigation to ensure the accuracy of the results. The  
10  
11 226 questionnaire did not indicate the patient's identification information. No patient  
12  
13 227 participated in the recruitment and implementation of the study.  
14  
15  
16

### 17 228 **Institutional Review Board approval**

18  
19 229 Consent was acquired from the nurse director of each ward and verbal approvals were  
20  
21 230 obtained from patients. This study was also approved by Gansu Provincial Hospital  
22  
23 231 Research Ethics Committee.  
24  
25  
26

### 27 232 **Data collection**

28  
29  
30 233 Five nursing students were trained previously by one of the authors(ZJX). The  
31  
32 234 training lasted for two days. On the first day, students were trained to understand the  
33  
34 235 meaning of each item of the questionnaire. On the second day, students were shown  
35  
36 236 how to communicate with patients. After that, each student selected a patient in a  
37  
38 237 specified department to conduct a pre-survey using the questionnaire, and gave  
39  
40 238 feedback regarding the survey process, so that the trainers could answer them in a  
41  
42 239 timely manner.  
43  
44  
45

46 240 At the time of admission, a lottery method was adopted by the nurse manager to  
47  
48 241 randomly select patients. Then, the students made records and attended to patients 48h  
49  
50 242 later since their admission. A private room at the department was used to interview  
51  
52 243 patients. Family members were present during some of the interviews at the request of  
53  
54 244 patients. If the patient could not fill in the form due to various factors, the student  
55  
56 245 would ask the question and gave a certain amount of time for patients to make  
57  
58 246 statements for each question. After each question, the student helped to fill in the  
59  
60



1  
2  
3 247 questionnaire according to patients answer. In addition, medical records were  
4  
5 248 reviewed for certain variables such as hospital length of stay and history of admission.  
6  
7  
8 249 The study started on August 2018,till November of 2018, there were 291 patients who  
9  
10 250 completed the survey.

## 11 251 **Data analysis**

12  
13  
14 252 The data were collected and analyzed with SPSS version 21.0. Patient satisfaction  
15  
16  
17 253 with nursing service was described by the mean, standard deviation, frequency and  
18  
19 254 percentage. As the missing data was less than 5% in some items, we used listwise  
20  
21 255 deletion to deal with them. Considering the study by Ahmed et al,<sup>21</sup> we used the same  
22  
23  
24 256 method to use mean satisfaction score as a cut point to dichotomise satisfaction into  
25  
26 257 ‘satisfied’ and ‘not satisfied’. Based on the years of experience, the profession title of  
27  
28 258 nurses were divided into junior(1-5 years) and senior(above 5 years). In addition to  
29  
30 259 hospitalization, we also checked whether patients had a history of hospitalization in  
31  
32  
33 260 the past. Binary logistics regression analysis and backward stepwise method was used  
34  
35 261 to screen variables which affect patient satisfaction. The strength of the associations  
36  
37 262 was described using OR and 95% CI.

## 38 263 **Results**

### 39 264 **Patients’ characteristics**

40  
41  
42  
43  
44 265 Of the participants, the mean age is  $45.59 \pm 15.96$ . As seen in table 2, 54.6% were  
45  
46  
47 266 male, 87.6% were married and 23.7% were primary school graduates; 33.7% were  
48  
49 267 admitted in medical department, 43.6% had monthly family incomes between 3000-  
50  
51 268 4999 RMB(related to 436-726 USD). More than three-quarters (79%) of patients  
52  
53  
54 269 knew the name of their nurse in-charge of their nursing care and more than  
55  
56  
57 270 half(61,7%) were cared by junior registered nurses. Patients had variations in the  
58  
59  
60

271 duration of their hospital stays (2 - 36 days) with a mean of  $7.20 \pm 5.69$  days. The  
 272 hospital length of stay of inpatients in surgery ward (an average of 11 days) was  
 273 longer than that for medical inpatients (an average of 7 days). See table 2.

274 **Table 2** Socio demographic characteristics and NSNS calculated score for example(N=291)

| Variables                                 | Categories                            | Frequency                    | NSNS score |
|-------------------------------------------|---------------------------------------|------------------------------|------------|
|                                           |                                       | n(%)                         | Mean (SD)  |
| Gender                                    | Male                                  | 159(54.6)                    | 79.00±4.44 |
|                                           | Female                                | 132(45.4)                    | 77.12±4.85 |
| Monthly family income(CNY)*               | <100                                  | 1(0.3)                       | 78.0±0.35  |
|                                           | <1000                                 | 17(5.7)                      | 77.52±4.05 |
|                                           | 1000-2999                             | 103(34.6)                    | 85.0±0.05  |
|                                           | 3000-4999                             | 130(43.6)                    | 78.56±4.37 |
|                                           | ≥5000                                 | 39(13.1)                     | 77.0±6.45  |
| Marital status                            | ≥10000                                | 1(0.3)                       | 78.52±4.05 |
|                                           | Single                                | 20(6.9)                      | 78.5±2.35  |
|                                           | Married                               | 255(87.6)                    | 77.98±4.95 |
| Educational status                        | Others                                | 16(5.5)                      | 80.4±1.59  |
|                                           | Primary school                        | 69(23.7)                     | 78.27±4.01 |
|                                           | High school                           | 146(50.2)                    | 77.90±4.53 |
|                                           | Advanced diploma                      | 40(13.7)                     | 77.82±6.15 |
|                                           | Bachelor's degree                     | 35(12.0)                     | 79.11±4.96 |
| Admission ward                            | Master degree                         | 1(0.3)                       | 85.0±0.05  |
|                                           | Medicine                              | 99(33.7)                     | 78.62±4.93 |
|                                           | Surgery                               | 78(26.5)                     | 77.63±2.97 |
|                                           | Obstetrics and gynecology             | 42(14.4)                     | 74.5±5.5   |
|                                           | Ophthalmology and otorhinolaryngology | 18(6.2)                      | 79.77±3.13 |
|                                           | Rehabilitation department             | 22(7.6)                      | 80.86±5.13 |
| History of admission                      | Yes                                   | 146(50.2)                    | 78.76±4.57 |
|                                           | No                                    | 145(49.8)                    | 77.53±4.82 |
| Patients know the name of nurse in-charge | Yes                                   | 221(75.9)                    | 78.47±4.65 |
|                                           | No                                    | 70(24.1)                     | 77.14±4.82 |
| Living area                               | Urban                                 | 146(50.2)                    | 77.98±4.08 |
|                                           | Rural                                 | 145(49.8)                    | 78.31±5.28 |
| Title of staff nurse                      | Junior RN**                           | 177(61.7)                    | 79.15±4.25 |
|                                           | Senior RN                             | 114(38.3)                    | 76.56±4.98 |
| <b>Mean satisfaction score</b>            |                                       | <b>78.15(Max. 95) ± 4.74</b> |            |

275 NSNS, Newcastle Satisfaction with Nursing Scale.\*USD1 is 7.4 Chinese Yuan (CNY).\*\*RN, Registered Nurse.

## 276 Satisfaction with nursing care

277 As shown in Table 2, the average satisfaction score of patients is  $78.15 \pm 4.74$ .  
 278 Regarding nursing care, as shown in table 3, patients reported the highest satisfaction  
 279 when nurses treated them as an individual(67.7%) and respected their privacy (60.8%).  
 280 Patients were least satisfied with the type of information nurses gave to them(11.7%)

281 and a lack of awareness in the patient's needs(9.6%). As showed in table 4, after  
 282 dichotomising satisfaction into 'satisfied' and 'not satisfied', 60.5% of the study  
 283 participants were satisfied with the care provided by nurses.

284 **Table 3** Percentage distribution of items for satisfaction with nursing care in admitted patients at GPH.

| Item                                                                                       | Not at all<br>satisfied<br>n (%) | Barely<br>satisfied<br>n (%) | Quite<br>satisfied<br>n (%) | Very<br>satisfied<br>n (%) | Completely<br>satisfied<br>n (%) |
|--------------------------------------------------------------------------------------------|----------------------------------|------------------------------|-----------------------------|----------------------------|----------------------------------|
| 1.The amount of time nurses spent with patient                                             | 0                                | 4(1.4)                       | 42(14.4)                    | 179(61.5)                  | 66(22.7)                         |
| 2.How capable nurses were at their job                                                     | 0                                | 1(0.3)                       | 16(5.5)                     | 156(53.6)                  | 118(40.5)                        |
| 3.There always being a nurse around when needed                                            | 0                                | 2(0.7)                       | 58(19.9)                    | 164(56.4)                  | 67(23.0)                         |
| 4.The amount nurses knew about patient care                                                | 0                                | 1(0.3)                       | 38(13.1)                    | 193(66.3)                  | 59(20.3)                         |
| 5.How quickly nurses came when patient called them                                         | 0                                | 1(0.3)                       | 30(10.3)                    | 123(42.3)                  | 137(47.1)                        |
| 6.The way the nurses made patient feel at home                                             | 0                                | 1(0.3)                       | 47(16.2)                    | 187(64.3)                  | 56(19.2)                         |
| 7.The amount of information nurses gave to patient about their<br>condition and treatment  | 0                                | 5(1.7)                       | 124(42.6)                   | 102(35.1)                  | 60(20.6)                         |
| 8.How often nurses checked to see if patients were well                                    | 0                                | 1(0.3)                       | 27(9.3)                     | 176(60.5)                  | 87(29.9)                         |
| 9.Nurses' helpfulness                                                                      | 0                                | 1(0.3)                       | 26(8.9)                     | 192(66.0)                  | 72(24.7)                         |
| 10.The way nurses explained things to patient                                              | 1(0.3)                           | 0                            | 29(10.0)                    | 166(57.0)                  | 95(32.6)                         |
| 11.How nurses helped put patient relatives' or friends' minds at rest                      | 0                                | 0                            | 41(14.1)                    | 161(55.3)                  | 89(30.6)                         |
| 12.Nurses' manner in going about their work                                                | 0                                | 0                            | 12(4.4)                     | 111(38.1)                  | 167(57.4)                        |
| 13.The type of information nurses gave to patient about his/her<br>condition and treatment | 0                                | 3(1.0)                       | 97(33.3)                    | 157(54)                    | 34(11.7)                         |
| 14.Nurses' treatment of patient as an individual                                           | 0                                | 1(0.3)                       | 14(4.8)                     | 78(26.8)                   | 197(67.7)                        |
| 15.How nurses listened to patient worries and concerns                                     | 0                                | 1(0.3)                       | 55(18.9)                    | 196(67.4)                  | 39(13.4)                         |
| 16.The amount of freedom patient was given on the ward                                     | 0                                | 0                            | 83(28.5)                    | 170(58.4)                  | 38(13.1)                         |
| 17.How willing nurses were to respond to patient requests                                  | 0                                | 2(0.7)                       | 51(17.5)                    | 177(60.8)                  | 61(21)                           |
| 18.The amount of privacy nurses gave patient                                               | 0                                | 0                            | 36(12.4)                    | 78(26.8)                   | 177(60.8)                        |
| 19.Nurses' awareness of patient needs                                                      | 0                                | 3(1.0)                       | 130(44.7)                   | 130(44.7)                  | 28(9.6)                          |

285 GPH.,Gansu Provincial Hospital

## 286 **Factors influencing satisfaction**

287 Previous history of hospitalization and surgery were significant factors influencing  
 288 patient satisfaction with nursing care. A higher level of patient satisfaction was found  
 289 to exist in married patients with history of admission( $P<0.05$ ). Patients admitted in  
 290 medical wards showed the highest satisfaction compared to those in other wards. The  
 291 score without surgery was higher than that with( $p=0.045$ , $OR=0.64$ , 95%  $CI=0.38-$   
 292  $1.07$ ). The higher the nurse's professional title, the lower the score. The patient who  
 293 did not know the nurse in-charge had the lower score( $p=0.028$ , $OR=1.77$ , 95%  
 294  $CI=0.98-3.19$ )(Table 5).

295

**Table 4** Level of inpatients satisfaction with nursing services in a tertiary hospital of Gansu, China

| Variables                                      | Level of satisfaction                 |                                       |
|------------------------------------------------|---------------------------------------|---------------------------------------|
|                                                | Satisfied<br>(score $\geq 78$ ), N(%) | Dissatisfied<br>(score $< 78$ ), N(%) |
| <b>Gender</b>                                  |                                       |                                       |
| Male                                           | 105(59.66)                            | 54(46.05)                             |
| Female                                         | 71(40.34)                             | 61(53.04)                             |
| <b>Marital status</b>                          |                                       |                                       |
| Single                                         | 12(6.82)                              | 8(6.96)                               |
| Married                                        | 158(89.77)                            | 97(84.35)                             |
| Others                                         | 16(9.09)                              | 0                                     |
| <b>Admission ward</b>                          |                                       |                                       |
| Medicine                                       | 69(39.20)                             | 29(25.22)                             |
| Surgery                                        | 41(23.29)                             | 36(31.30)                             |
| Obstetrics and gynecology                      | 11(6.25)                              | 31(26.96)                             |
| Ophthalmology and<br>Rehabilitation department | 13(7.39)                              | 5(4.35)                               |
|                                                | 16(9.09)                              | 6(5.22)                               |
| <b>History of admission</b>                    |                                       |                                       |
| Yes                                            | 95(53.98)                             | 51(44.33)                             |
| No                                             | 81(46.02)                             | 64(55.65)                             |
| <b>History of surgery</b>                      |                                       |                                       |
| Yes                                            | 81(43.02)                             | 66(57.39)                             |
| No                                             | 95(53.98)                             | 49(42.61)                             |
| <b>Know the nurse in charge</b>                |                                       |                                       |
| Yes                                            | 140(79.55)                            | 81(70.43)                             |
| No                                             | 36(20.45)                             | 34(29.56)                             |
| <b>Title of nurse in charge</b>                |                                       |                                       |
| junior                                         | 121(68.75)                            | 56(48.69)                             |
| senior                                         | 55(31.25)                             | 59(51.30)                             |
| <b>Educational status</b>                      |                                       |                                       |
| Primary school                                 | 43(24.43)                             | 26(22.61)                             |
| High school                                    | 87(49.43)                             | 59(51.30)                             |
| Advanced diploma                               | 22(12.50)                             | 18(15.65)                             |
| Bachelor's degree                              | 23(13.07)                             | 12(10.43)                             |
| Master degree                                  | 1(0.57)                               | 0                                     |
| <b>Total</b>                                   | 176(60.50)                            | 115(39.50)                            |

296

297

**Table 5** Factors influencing patients' satisfaction with nursing care.

| Variables                | B     | S.E  | Sig.  | 95%CI     |
|--------------------------|-------|------|-------|-----------|
| Gender                   | 0.15  | 0.32 | 0.640 | 0.61,2.19 |
| Marital status           | -1.08 | 0.51 | 0.037 | 0.13,0.93 |
| Admission ward           | -0.02 | 0.12 | 0.839 | 0.76,1.24 |
| History of admission     | 0.29  | 0.38 | 0.045 | 0.67,2.29 |
| History of surgery       | -0.60 | 0.29 | 0.049 | 0.30,0.98 |
| Know the nurse in charge | 0.79  | 0.34 | 0.021 | 1.13,4.35 |
| Title of nurse in charge | 0.99  | 0.30 | 0.001 | 1.49,4.89 |
| Educational status       | -0.13 | 0.19 | 0.486 | 0.59,1.27 |

298

299 **Discussion**

1  
2  
3 300 Patients' satisfaction with hospital care are significantly associated with better patient  
4 301 safety, clinical effectiveness,<sup>45</sup> health outcomes<sup>46</sup> and less medical resource  
5 302 utilization.<sup>47</sup> In the current reform of China's health - care system, we need to have a  
6 303 better understanding on what is associated with patient satisfaction, and what we can  
7 304 do to improve it. Comparably no study on patient satisfaction in Northwest of China  
8 305 are reported in English. The international research community has limited access to  
9 306 and understanding of patient satisfaction in this area. In this study, we use NSNS to  
10 307 investigated the level of inpatients satisfaction with nursing care and its associated  
11 308 factors in Northwest of China. The results showed that the patient's overall  
12 309 satisfaction in nursing is 78.15+4.74 (95 points are completely satisfied), and 60.5%  
13 310 of inpatients were satisfied with nursing services at GPH.. Marital status, history of  
14 311 admission, history of surgery, know the nurse in-charge and title of nurse in-charge  
15 312 were significantly associated with patient satisfaction.

16 313 The level of patient satisfaction(60.5%) in our study was higher than the results  
17 314 obtained in other area China, such as in Taiwan(35%)<sup>48</sup> Malaysia<sup>22</sup> and 11 Western  
18 315 provinces in China(60%),<sup>37</sup> however, it is lower than that in Shandong,<sup>31</sup> Jiangxi,  
19 316 <sup>36</sup>,and other cities in Gansu China,<sup>33,35</sup>also in Spain<sup>49</sup> and Australia.<sup>50</sup> This might be  
20 317 related to differences in sample size, region and the use of a different survey scale,  
21 318 therefore it is difficult to make absolute comparison of these results. When the  
22 319 research findings were compared with studies conducted using the same scale  
23 320 internationally, the average score was higher than Turkey(62.08+20.94),<sup>5</sup> Ethiopia  
24 321 (63.9+17),<sup>21</sup> Polish(74.98),<sup>15</sup> Jordan(77.1+12.52),<sup>51</sup> and Pakistan(51%),<sup>52</sup> but lower  
25 322 than studies conducted in Beijing<sup>29</sup> and Henan province<sup>30</sup> in China. A study from  
26 323 rural Western China showed that patients in primary health care were relatively less  
27 324 satisfied with medical service than developed areas.<sup>53</sup> Our study may indicated this.  
28 325 Although overall patient satisfaction was moderate, this study revealed that patients  
29 326 were mostly satisfied with nurse's attitude treating them as an individual and  
30 327 respected their privacy. However, least patients in the study were satisfied with the  
31 328 type of information nurses gave to them(11.7%) and a lack of awareness in the  
32 329 patient's needs(9.6%). The findings are consistent with the outcomes of other  
33 330 studies.<sup>54,55,56,57</sup> It could be that, first of all, due to the heavy workload, nurses spend  
34 331 more time on completing doctor's orders and therapeutic work, less time is spent on  
35 332 communicating with patients and conducting health education. This may also result

1  
2  
3 333 from the fact that in most Chinese hospitals there are no nurse assistants whose main  
4 334 tasks are the performance of basic nursing activities such as bathing, oral toilet,  
5 335 changing, ect.<sup>58</sup> Nurse staff in different professional layer need to perform various  
6 336 direct and indirect nursing activities. Moreover, hospital in less developed area may  
7 337 face a larger proportion of patients with lower education level.<sup>53</sup> They may have more  
8 338 demands of medical knowledge. However, with such workload, nurses were eager to  
9 339 educate patients and therefore providing incomplete information that unmet patients'  
10 340 needs.<sup>59</sup> In various clinical settings, information is the decisive factor for good patient  
11 341 experience.<sup>60</sup> Poor communication between health care professionals and their  
12 342 patients is a key problem in the growing number of complaints against health care  
13 343 professionals worldwide.<sup>61</sup> Therefore, investigating all aspects of patients' needs and  
14 344 providing them with care and information to meet their needs through communication  
15 345 plays an important role in patients' satisfaction.<sup>62</sup>

16 346 A better understanding of the factors affecting care quality can help hospital  
17 347 managers implement effective plans to improve service quality.<sup>63</sup> In the current study,  
18 348 we find that married patients were more satisfied than others. This finding was in  
19 349 accordance with a study conducted in Amhara Region<sup>64</sup> which used the NSNS scale,  
20 350 and a hospital in China<sup>26</sup> which used other scale to assess patients satisfaction. This  
21 351 could be that married patients are accompanied by their spouses who provides daily  
22 352 care and communicates with them. Therefore, they have relatively less demand from  
23 353 nurses. Prevalence of preoperative anxiety ranged between 60–80% in population,<sup>65</sup>  
24 354 which have been commonly neglected by clinicians.<sup>66</sup> Study has shown that patients  
25 355 who are well-informed and understand the process have a better surgical experience.  
26 356<sup>49</sup> However, these may not did well in our study as patients with surgery showed less  
27 357 satisfied with nursing services. It is suggested that patients need to be assessed  
28 358 regularly for anxiety during the preoperative visit and appropriate anxiety reducing  
29 359 methods should be introduced. Nursing staff should attach importance to nurse-patient  
30 360 communication through assessing patient needs to provide health related information  
31 361 and care services so as to meet patients' needs,<sup>62</sup> increasing their satisfaction.

32 362 Another factor that needs to be emphasized is that patient with history of  
33 363 hospitalization were found to be more satisfied than their counter parts, similar result  
34 364 was found in other study conducted in Ethiopia<sup>67</sup> and China.<sup>26</sup> This could be because  
35 365 patients who are hospitalized for first time are unfamiliar with nursing staff and

1  
2  
3 366 hospital environment. They may have more requirements in communication with  
4  
5 367 nurse regarding their disease and nursing services. For those with previous history of  
6  
7 368 admission, they have a certain understanding of their own diseases and health  
8  
9 369 conditions, and are familiar with the hospital environment and the ward nurses, and  
10  
11 370 have a stronger sense of security than patients hospitalized for the first time. Our  
12  
13 371 finding also showed patients who knew their nurse in-charge were significantly  
14  
15 372 satisfied with nursing than those who were not. Study showed patients receiving  
16  
17 373 continuity of care with the same nurse were more satisfied than those who not.<sup>41</sup> The  
18  
19 374 findings provide evidence for the value of nurses in nursing practice. Patients require  
20  
21 375 more individualized care from nurses regarding education, communication and  
22  
23 376 comfort<sup>2</sup> which will improve their well-being through reducing anxiety and  
24  
25 377 depression, and also indirectly, by building trust and social support.<sup>68</sup>

26 378 Research shows that nurses' work experience is related to patient satisfaction. So  
27  
28 379 it is helpful to provide guidance for rational allocation of nursing human resources to  
29  
30 380 discuss whether the composition of professional titles affect patient satisfaction.  
31  
32 381 Tarja's research shows that the working years of nurses are positively correlated with  
33  
34 382 satisfaction.<sup>69</sup> In China, the level of nurses is divided into professional titles which  
35  
36 383 correspond to junior(1-5), intermediate(5-10), and senior(more than 10 years). The  
37  
38 384 more nurses with solid professional knowledge and rich working experience among  
39  
40 385 nursing staff, the better the effect of nursing work.<sup>26</sup> Research by Wang shows that  
41  
42 386 patients' satisfaction with nursing professional skills is positively correlated with the  
43  
44 387 proportion of nurses working for more than 5 years, and satisfaction with health  
45  
46 388 education is positively correlated with the proportion of competent nurses.<sup>40</sup> Han's  
47  
48 389 survey shows that patients are most satisfied with nurses who have worked for 2-5  
49  
50 390 years.<sup>70</sup> Our findings also showed the same as the patients in-charged by junior nurse  
51  
52 391 who worked as nurse for less than 5 years were more satisfied than those by senior.  
53  
54 392 The reason may be that nurses who have worked for more than 5 years have rich  
55  
56 393 clinical experience and better operating skills, but most of them have a sense of job  
57  
58 394 burnout, which has a negative impact on patient satisfaction.<sup>70</sup> On the other hand, due  
59  
60 395 to the different division of labor in GPH, nurses working for less than 5 years are  
396  
397 mainly engaged in first-line clinical nursing, while senior nurses are engaged in some  
398  
399 work related to ward organization and management. Therefore, senior nurses have  
400  
401 less communication with patients, thus affecting patients' satisfaction with their work.

1  
2  
3 399 It indicated that nurse-patient communication plays an important role in the  
4  
5 400 evaluation of patients' satisfaction with nursing work.  
6  
7

8 401 **Conclusion**  
9

10  
11 402 In conclusion, the current study explored the level of patient satisfaction with nursing  
12  
13 403 services and its associated factors. It shows that the care needs of hospitalized patients  
14  
15 404 are still not satisfied to some extent. Meanwhile, patients' married status, history of  
16  
17 405 hospitalization and surgery, professional title of in-charged nurses when providing  
18  
19 406 care are main factors effecting patients satisfaction with nursing care. The current  
20  
21 407 finding will have direct implication towards nurse professionals and nursing  
22  
23 408 administrators. Nurses should establish a good relationship with patients through  
24  
25 409 more communication. In daily nursing work, nurses should formulate corresponding  
26  
27 410 nursing plans according to the personal characteristics and care needs of patients so as  
28  
29 411 to sufficiently meet patients' expectations.  
30  
31  
32  
33

34 412 Of course, besides nursing, there are many factors that will affect the patient's  
35  
36 413 satisfaction, including patient staffing ratio, the use of health information technology,  
37  
38 414 the amount of surgery in the hospital and the health teaching situation. Based on our  
39  
40 415 experience, we suggest to conduct interviews with patient as a first step to learn what  
41  
42 416 patients are most concerned with when seeking nursing services.  
43  
44  
45

46 417  
47

48 418  
49

50 419  
51

52 420  
53

54 421  
55

56 422  
57  
58  
59  
60



1  
2  
3 **423 Declarations**  
4  
5

6 **424 Ethics approval :** This study was approved by Gansu Provincial Hospital's Ethic  
7  
8  
9 **425** Commission.

10  
11  
12 **426 Consent for publication:** Not applicable.  
13  
14

15  
16 **427 Availability of data and material :** The data sets used and/or analysed during the  
17  
18  
19 **428** current study are available from the corresponding author on reasonable request.  
20  
21

22  
23 **429 Competing interests :** The authors declare that they have no competing interests  
24  
25

26  
27 **430 Funding:** This study is funded by Gansu provincial hospital fund(17GSSY1-5). The  
28  
29  
30 **431** funding has no role in in the design of the study and collection, analysis, and  
31  
32 **432** interpretation of data and in writing the manuscript.  
33  
34

35  
36 **433 Authors' contributions :** YLM and WXY performed the survey. WJC analyzed and  
37  
38  
39 **434** interpreted the patient data regarding satisfaction and effective factors. ZJX  
40  
41 **435** performed the was a major contributor in writing the manuscript. DJ and SWJ  
42  
43 **436** collected data. All authors read and approved the final manuscript.  
44  
45

46  
47 **437 Acknowledgements:** We thank staff nurse Gao JX and Wen YJ's supporting in the  
48  
49 **438** questionnaire survey.  
50

51 **439**

52 **440**

53 **441**

54 **442**

55 **443**

56 **444**  
57  
58  
59  
60

445 **References**

- 446 1. Swarupa I, Hennb CM, Gulottaa LV, Frank Henn III R. Noseworthy TW. Patient expectations  
447 and satisfaction in orthopaedic surgery: A review of the literature. *Journal of Clinical*  
448 *Orthopaedics and Trauma* 2019; 10(4):755–760. DOI: [https://doi.org/10.1016/j.jcot.2018.08.](https://doi.org/10.1016/j.jcot.2018.08.008)  
449 008.
- 450 2. Berkowitz B. The Patient Experience and Patient Satisfaction: Measurement of a Complex  
451 Dynamic. *Online J Issues Nurs.* 2016;21(1):1. doi: 10.3912/OJIN. Vol21No01Man01.
- 452 3. Ahmed S, Miller J, Burrows JF, Bertha BK, Rosen P. Evaluation of patient satisfaction in  
453 pediatric dermatology. *Pediatr Dermatol.* 2017;34(6):668-672. doi: 10.1111/pde.13294.
- 454 4. Blank FS, Tobin J, Jaouen M, Smithline E, Tierney H, Visintainer P. A comparison of patient  
455 and nurse expectations regarding nursing care in the emergency department. *J Emerg Nurs.*  
456 2014; 40(4):317-22. doi: 10.1016/j.jen.2013.02.010.
- 457 5. Kol E, Arıkan F, İlaslan E, Akıncı MA, Koc MC. A quality indicator for the evaluation of  
458 nursing care: determination of patient satisfaction and related factors at a university hospital in  
459 the Mediterranean Region in Turkey. *Collegian* 2018;25:51–56. <https://doi.org/10.1016/j.j>
- 460 6. Al-Abri R, Al-Balushi A. Patient satisfaction survey as a tool towards quality improvement.  
461 *Oman Med J.* 2014;29(1):3-7. doi: 10.5001/omj.2014.02.
- 462 7. Seeber R. The kind peace of mind culture" improves patient satisfaction. *Rehabil Nurs.* 2012;  
463 37(6):286-91. doi: 10.1002/rnj.030.
- 464 8. Risser NL. Development of an instrument to measure patient satisfaction with nurse and  
465 nursing care in primary care settings. *Nursing Research* 1975;24:45-52.
- 466 9. Eriksen LR. Patient satisfaction with nursing care: concept satisfaction. *Journal of Nursing*  
467 *Measurement* 1995;3:59-76.
- 468 10. American Nurses Association. Quality Indicators for Acute Care Settings. *Healthcare*  
469 *Benchmarks* 1999;12:138-139.
- 470 11. Davins J, Gens M, Pareja C, Guzmán R, Marquet R, Vallès R. El modelo de acreditación de  
471 atención primaria de Catalunya: un modelo válido. *Med Clin (Barc)* 2014; 143: 74–80. doi:  
472 10.1016/j.medcli.2014.07.015.
- 473 12. ANCC. American Nurses Credentialing Center. Magnet Recognition Program Model,  
474 <https://www.nursingworld.org/organizational-programs/magnet/> (2017, accessed 17 February  
475 2018).
- 476 13. Karaca A, Durna Z. Patient satisfaction with the quality of nursing care. *Nurs Open* 2019;  
477 6(2):535–545. doi:10.1002/nop2.237.
- 478 14. Land L, Suhonen R. Orthopaedic and trauma patients' perceptions of individualized care. *Int*  
479 *Nurs Rev.* 2009;56(1):131–7. doi: 10.1111/j.1466-7657. 2008.00688.x.
- 480 15. Gutysz-Wojnicka A, Dyk D, Cudak E, Ozga D. Measuring patient satisfaction with the polish  
481 version of the Newcastle satisfaction with nursing scale. *Scand J Caring Sci.* 2013;27(2):311–8.  
482 doi: 10.1111/j.1471-6712.2012.01034.x.

- 1  
2  
3 483 16. Rose PM. Patients' characteristics informing practice: improving individualized nursing care in  
4 484 the radiation oncology setting. *Support Care Cancer* 2018; 26(10):3609-3618. doi:  
5 485 10.1007/s00520-018-4210-5.  
6  
7 486 17. Alasad J, Abu Tabar N, AbuRuz ME. Patient Satisfaction With Nursing Care: Measuring  
8 487 Outcomes in an International Setting. *J Nurs Adm.* 2015;45(11):563-8. doi: 10.1097/NNA.  
9 488 0000000000000264.  
10  
11 489 18. Köberich S, Feuchtinger J, Farin E. Factors influencing hospitalized patients'  
12 490 perception of individualized nursing care: a cross-sectional study. *BMC Nursing* 2016;15:14.  
13 491 doi: 10.1186/s12912-016-0137-7.  
14  
15 492 19. Atallah MA, Hamdan-Mansour AM, Al-Sayed MM, Aboshaiqah AE. Patients' satisfaction  
16 493 with the quality of nursing care provided: the Saudi experience. *Int J Nurs Pract.*2013;  
17 494 19(6):584–90. doi: 10.1111/ijn.12102.  
18  
19 495 20. Suhonen R, Land L, Valimaki M, Berg A, Idvall E, Kalafati M, et al. Impact of patient  
20 496 characteristics on orthopaedic and trauma patients' perceptions of individualised nursing  
21 497 care. *Int J Evid Based Healthc.* 2010;8(4):259–67. doi: 10.1111/j.1744-1609.2010.00185.x.  
22  
23 498 21. Ahmed T, Assefa N, Demisie A, Kenay A. Levels of Adult Patients' Satisfaction with Nursing  
24 499 Care in Selected Public Hospitals in Ethiopia. *International Journal of Health Sciences*  
25 500 2014;8(4):371-379.  
26  
27 501 22. Zun AB, Ibrahim MI, Hamid AA. Level of Satisfaction on Service Quality Dimensions  
28 502 Based on SERVQUAL Model Among Patients Attending Malaysia Clinic in Kota Bharu,  
29 503 Malaysia. *Oman Med J.* 2018; 33(5): 416–422. doi: 10.5001 /omj.2018.76.  
30  
31 504 23. Duan M, Li D, Dong X. Analysis of job satisfaction among medical staff of public hospitals in  
32 505 Xingjiang. *J Xinjiang Med Univ.* 2015; 38: 635–637.  
33  
34 506 24. Ministry of Health (MoH). China Health Statistical Yearbook; Press of Peking Union Medical  
35 507 College: Beijing, China, 2017.  
36  
37 508 25. Wang S, Rui J, Ke X, Dai L, Xing H, Li Z. Job satisfaction survey among 580 medical staff in  
38 509 public hospitals in a city. *Hei Long Jiang Med J.* 2015; 37: 510–514.  
39  
40 510 26. MoH. Ministry of Health Releases Quality Care Service Standards to Strengthen Hospital  
41 511 Clinical Care. [http://www.china.com.cn/policy/txt/2010-12/23/content\\_21604283.htm](http://www.china.com.cn/policy/txt/2010-12/23/content_21604283.htm).  
42  
43 512 27. The National Nursing Development Plan (2016-2020), National Health Commission of the  
44 513 People's Republic of China, 2016.  
45  
46 514 28. Guo YH, Jiao J, Zheng XJ, Liu HP. A survey of inpatient satisfaction with nursing care in 24  
47 515 districts of China (Chinese). *Chinese Journal of Nursing* 2008, 43(4) : 293-298.  
48  
49 516 29. Jiao J. Inpatient satisfaction with nursing care and its influencing factors in 3-A-Grade general  
50 517 hospitals in Beijing (Chinese). Beijing Xiehe Medical University, thesis, 2009.  
51  
52 518 30. Fu WJ. Study of effects of family-centered care on quality of life in parents of children with  
53 519 cerebral palsy. Zhenzhou University, thesis, 2012  
54  
55  
56  
57  
58  
59  
60

- 1  
2  
3 520 31. Nie SM. Study on inpatient satisfaction with nursing and influencing factors in some second  
4 521 A hospitals(Chinese). Master thesis, Shandong University, 2014.  
5  
6 522 32. Shan LH, Li Y, Ding D, Wu Q, Liu C, Jiao M, et al. Patient Satisfaction with Hospital  
7 523 Inpatient Care: Effects of Trust, Medical Insurance and Perceived Quality of Care. *PLoS ONE*  
8 524 2016; 11(10): e0164366. doi:10.1371/journal.pone.0164366.  
9  
10 525 33. Hu L. Investigation on Satisfaction of Inpatients in a Hospital in Qingyang City, Gansu  
11 526 Province, China. *Western traditional Chinese medicine*. 2014;11:87-90.  
12  
13 527 34. Guo M. A Survey on Inpatient Satisfaction and Influence Factors Analysis in a Tertiary  
14 528 Hospital, Master thesis, Dalian Medical University. 2015.  
15  
16 529 35. Xing Y, Tang R, Du HF, Xu HR. Satisfactory Degree of Inpatients in Some Hospitals in  
17 530 Northwest Region to Nursing Services. *Chinese health industry* 2016;06(c):67-70.  
18  
19 531 36. Liu XJ, Lu H, Wang Y, Wang W, Hou Z, Tan A, Mao Z. Factors affecting patient satisfaction  
20 532 with ecdemic medical care: a cross-sectional study in nanchang, china. *Patient Preference and*  
21 533 *Adherence* 2018;12: 1373–1382.  
22  
23 534 37. Liu JL, Mao Y. Patient Satisfaction with Rural Medical Services: A Cross-Sectional Survey in  
24 535 11 Western Provinces in China. *Int. J. Environ. Res. Public Health* 2019; 16; 3968.  
25 536 doi:10.3390/ijerph16203968.  
26  
27 537 38. Fang PP, Ye Q, Li YX, Wang ZN, Miu Y, Xu HB. Analysis on Workplace Violence in Hospital  
28 538 from Nurses' Perspective and Countermeasure(Chinese). *Chinese Health Service Management*  
29 539 2016;33(4):255-258.  
30  
31 540 39. Zou QH. Research on the Current Situation and Risk Factors of Workplace Violence of Nurses  
32 541 in Level C Hospitals - Taking 3 Level C Hospitals as Examples(Chinese). Beijing University of  
33 542 Chinese Medicine, Master thesis, 2018.  
34  
35 543 40. Wang C, Sun CH. Impacts of capability for work, mental health, and coping style of nurses on  
36 544 hospital workplace violence(Chinese). *Chinese Journal of Public health* 2015;23(7):941-945.  
37  
38 545 41. Zhang D, Lu D, Shi Y, Xie FZ, Wang JH, Xie YJ, Zhang SE, Sun T. Impact of Patients Violence  
39 546 in Public Hospital on Job Burnout of Nurses(Chinese). *Chinese Journal of Hospital*  
40 547 *Administration* 2016;36(9):69-71.  
41  
42 548 42. National Economic Ranking of Provinces in China, 2018. Beijing Youth Daily. 2019-02-  
43 549 11. [http://www.sohu.com/a/307360333\\_120060910](http://www.sohu.com/a/307360333_120060910).  
44  
45 550 43. Xing Y, Tang R, Du HF, Xu HR. Satisfactory Degree of Inpatients in Some Hospitals in  
46 551 Northwest Region to Nursing Services. *Chinese health industry*, 2016;06(c):67-70.  
47  
48 552 44. Thomas LH, McColl E, Priest J, Bond S, Boys RJ. Newcastle satisfaction with scales: an  
49 553 instrument for quality assessments of nursing care. *Quality in Health Care* 1996; 5(2): 67–72.  
50  
51 554 45. Tsai TC, Orav EJ, Jha AK. Patient satisfaction and quality of surgical care in US hospitals. *Ann*  
52 555 *Surg*. 2015; 261(1):2-8.  
53  
54  
55  
56  
57  
58  
59  
60

- 1  
2  
3 556 46. Doyle C, Lennox L, Bell D. A systematic review of evidence on the links  
4 557 between patient experience and clinical safety and effectiveness. *BMJ Open* 2013; 3(1):  
5 558 e001570. doi: 10.1136/bmjopen-2012-001570.  
6  
7 559 47. Tobis S, Wiczciorowska-Tobis K, Talarska D, Pawlaczyk M, Suwalska A. Needs of older  
8 560 adults living in long-term care institutions: an observational study using Camberwell  
9 561 Assessment of Need for the Elderly. *Clinical Interventions in Aging* 2018,13: 2389–2395. doi:  
10 562 10.2147/CIA.S145937.  
11  
12  
13  
14 563 48. Khan M, Hassan R, Anwar S, Babar TS. Patient Satisfaction with Nursing Care. *Rawal*  
15 564 *Medical Journal* 2007; 32(1): 28-30.  
16  
17  
18 565 49. Sillero A, Zabalegui A. Satisfaction of surgical patients with perioperative nursing care in a  
19 566 Spanish tertiary care hospital. *SAGE Open Med.* 2018; 6: 2050312118818304. doi:  
20 567 10.1177/2050312118818304.  
21  
22 568 50. Desborough J, Phillips C, Banfield M, Bagheri N, Mills J. Impact of nursing care in Australian  
23 569 general practice on the quality of care: A pilot of the Patient Enablement and Satisfaction  
24 570 Survey (PESS). *Collegian* 2015; 22(2): 207-214. <https://doi.org/10.1016/j.colegn.2014.10.003>.  
25  
26 571 51. Jafar A, Alasad, Muayyad M, Ahmad. Patients' satisfaction with nursing care in Jordan.  
27 572 *International Journal of Health Care Quality Assurance* 2003; 16: 279-285. DOI: 10.1108/  
28 573 09526860310495660.  
29  
30 574 52. Younas A, Sundus A. Patients' experiences and satisfaction about care provided by male  
31 575 nurses in medical surgical units in Islamabad, Pakistan: A pilot study. *Nurs Forum* 2018;  
32 576 53(1):12-19. doi: 10.1111/nuf.12212.  
33  
34  
35  
36  
37 577 53. Xin He, Lingui Li, Ying Bian. Satisfaction survey among primary health care outpatients in  
38 578 the backward region: an empirical study from rural Western China. *Patient Preference and*  
39 579 *Adherence* 2018; 12: 1989–1996.  
40  
41  
42  
43 580 54. Lee TL, Crouse M, Gipson K. No-Pass Zone: Multidisciplinary Approach to Responding  
44 581 to Patient Needs. *J Nurs Care Qual.* 2016; 31(4): 327-34. doi: 10.1097/NCQ.  
45 582 0000000000000179.  
46  
47 583 55. Milutinovic D, Simin D, Brkic N, Brkic S. The patient satisfaction with nursing care quality:  
48 584 the psychometric study of the Serbian version of PSNCQ questionnaire. *Scand J Caring*  
49 585 *Sci.* 2012; 26(3): 598–606. doi: 10.1111/j.1471-6712.2012.00969.x.  
50  
51 586 56. Belayneh M. Inpatient satisfaction and associated factors towards nursing care at Felegehiwot  
52 587 Referral Hospital. Northwest Ethiopia: Amhara Regional State. Retrieved October, 2016. from  
53 588 <http://www.gjmedph.com/uploads/O7-Vo5No3.pdf>.  
54  
55 589 57. Chan B, Goldman LE, Sarkar U, Schneidermann M, Kessell E, Guzman D, Critchfield J,  
56 590 Kushel M. The Effect of a Care Transition Intervention on the Patient Experience of Older  
57  
58  
59  
60

- 1  
2  
3 591 Multi-Lingual Adults in the Safety Net: Results of a Randomized Controlled Trial. *J Gen Intern*  
4 592 *Med.* 2015; 30(12):1788-94. doi: 10.1007/s11606-015-3362-y.  
5  
6 593 58. NskiMW, Ksykiewicz-Dorota A, Fidecki WB.Scope of Nursing Care in Polish Intensive  
7 594 Care Units. *BioMed Research International* 2013,4:1-  
8 595 9.<http://dx.doi.org/10.1155/2013/463153>.  
9  
10 596 59. Adugbire1 A, Aziato L.Surgical patients' perspectives on nurses' education on post-  
11 597 operative care and follow up in Northern Ghana Bernard.*BMC Nursing* 2018; 17:29.  
12 598 <https://doi.org/10.1186/s12912-018-0299-6>.  
13  
14 599 60. Patient Information Forum. Making the case for information: the evidence for investing in  
15 600 high quality information for patients and the public. Patient Information Forum,  
16 601 2013. [https://www.pifonline.org.uk/wp-content/uploads/2013/05/PiF-full-report-FINAL-](https://www.pifonline.org.uk/wp-content/uploads/2013/05/PiF-full-report-FINAL-new.pdf)  
17 602 [new.pdf](https://www.pifonline.org.uk/wp-content/uploads/2013/05/PiF-full-report-FINAL-new.pdf). Accessed 21 July 2016.  
18  
19 603 61. Amutio-Kareaga A, García-Campayo J, Delgado LC, Hermosilla D, Martínez-Taboada C.  
20 604 Improving Communication between Physicians and Their Patients through Mindfulness and  
21 605 Compassion-Based Strategies: A Narrative Review. *J Clin Med.* 2017; 6(3): 33. doi:  
22 606 10.3390/jcm6030033.  
23  
24 607 62. Jiang S.The Relationship between Face-to-Face and Online Patient-Provider Communication:  
25 608 Examining the Moderating Roles of Patient Trust and Patient Satisfaction. *Health Commun.*  
26 609 2019; 1:1-9. doi: 10.1080/10410236.2018.1563030.  
27  
28 610 63. Liu Y, Aunguroch Y. Factors influencing nurse-assessed quality nursing care: A cross-  
29 611 sectional study in hospitals. *J Adv Nurs.* 2018;74(4):935-945. doi: 10.1111/jan.13507.  
30  
31 612 64. Kasa AS, Gedamu H.Predictors of adult patient satisfaction with nursing care in public  
32 613 hospitals of Amhara region, Northwest Ethiopia.*BMC Health Serv Res.* 2019; 19: 52.doi:  
33 614 10.1186/s12913-019-3898-3.  
34  
35 615 65. WoldegerimaY.B.FitwiG.L.YimerH.T.HailekirosA.G. Prevalence and factors associated with  
36 616 preoperative anxiety among elective surgical patients at University of Gondar Hospital. Gondar,  
37 617 Northwest Ethiopia, A cross-sectional study.*International Journal of Surgery Open*2018;10: 21-  
38 618 29. <https://doi.org/10.1016/j.ijso.2017.11.001>.  
39  
40 619 66. Pereira L, Figueiredo-Braga M, Carvalho IP. Preoperative anxiety in ambulatory surgery: The  
41 620 impact of an empathic patient-centered approach on psychological and clinical outcomes.  
42 621 *Patient Educ Couns.* 2016; 99(5):733-8. doi: 10.1016/j.pec.2015.11.016.  
43  
44 622 67. Sharew NT, Bizuneh HT, Assefa HK, Habtewold TD. Investigating admitted patients'  
45 623 satisfaction with nursing care at DebreBerhan Referral Hospital in Ethiopia: a cross-sectional  
46 624 study.*BMJ Open* 2018;8(5):e021107. doi: 10.1136/bmjopen-2017-021107.  
47  
48 625 68. Greenhalgh J, Gooding K, Gibbons E, Dalkin S, Wright J, Valderas J, Black N. How do  
49 626 patient reported outcome measures (PROMs) support clinician-patient communication and  
50 627 patient care? A realist synthesis.*J Patient Rep Outcomes.*2018;2:42. doi: 10.1186/s41687-018-  
51 628 0061-6.  
52  
53  
54  
55  
56  
57  
58  
59  
60

- 1  
2  
3 629 69. Tarja TH, Tarja K, PiIjo P. Patient Satisfaction as a Positive Nursing Outcome. *Journal of*  
4 630 *Nursing Care Quality*, 2007;23(1):58-65.  
5  
6 631 70. Han CH, Connolly PM, Canham D. Measuring patient satisfaction as an outcome of nursing  
7 632 care at a teaching hospital of southern Taiwan. *J Nurs Care Qual.* 2003;18(2):143-50.  
8  
9 633  
10  
11  
12  
13  
14  
15  
16  
17  
18  
19  
20  
21  
22  
23  
24  
25  
26  
27  
28  
29  
30  
31  
32  
33  
34  
35  
36  
37  
38  
39  
40  
41  
42  
43  
44  
45  
46  
47  
48  
49  
50  
51  
52  
53  
54  
55  
56  
57  
58  
59  
60

For peer review only

STROBE Statement—Checklist of items that should be included in reports of *cross-sectional studies*

|                           | Item No | Recommendation                                                                                                                                                                                    |                                                   |
|---------------------------|---------|---------------------------------------------------------------------------------------------------------------------------------------------------------------------------------------------------|---------------------------------------------------|
| <b>Title and abstract</b> | 1       | (a) Indicate the study's design with a commonly used term in the title or the abstract<br>(b) Provide in the abstract an informative and balanced summary of what was done and what was found     | Title, paragraph 1-2<br>Abstract, paragraph 30-50 |
| <b>Introduction</b>       |         |                                                                                                                                                                                                   |                                                   |
| Background/rationale      | 2       | Explain the scientific background and rationale for the investigation being reported                                                                                                              | Background, paragraph 79-131                      |
| Objectives                | 3       | State specific objectives, including any prespecified hypotheses                                                                                                                                  | Background, paragraph 132-133                     |
| <b>Methods</b>            |         |                                                                                                                                                                                                   |                                                   |
| Study design              | 4       | Present key elements of study design early in the paper                                                                                                                                           | Study design, paragraph 150                       |
| Setting                   | 5       | Describe the setting, locations, and relevant dates, including periods of recruitment, exposure, follow-up, and data collection                                                                   | Setting, paragraph 136-138                        |
| Participants              | 6       | (a) Give the eligibility criteria, and the sources and methods of selection of participants                                                                                                       | sample, paragraph 153-171                         |
| Variables                 | 7       | Clearly define all outcomes, exposures, predictors, potential confounders, and effect modifiers. Give diagnostic criteria, if applicable                                                          | paragraph 177-186                                 |
| Data sources/measurement  | 8*      | For each variable of interest, give sources of data and details of methods of assessment (measurement). Describe comparability of assessment methods if there is more than one group              | paragraph 192-201                                 |
| Bias                      | 9       | Describe any efforts to address potential sources of bias                                                                                                                                         | paragraph 165-171                                 |
| Study size                | 10      | Explain how the study size was arrived at                                                                                                                                                         | Sample, paragraph 153-160                         |
| Quantitative variables    | 11      | Explain how quantitative variables were handled in the analyses. If applicable, describe which groupings were chosen and why                                                                      | Data Analysis, paragraph 158-161                  |
| Statistical methods       | 12      | (a) Describe all statistical methods, including those used to control for confounding                                                                                                             | Data Analysis, paragraph 203                      |
|                           |         | (b) Describe any methods used to examine subgroups and interactions                                                                                                                               | Data Analysis, paragraph 204-209                  |
|                           |         | (c) Explain how missing data were addressed                                                                                                                                                       | N/A                                               |
|                           |         | (d) If applicable, describe analytical methods taking account of sampling strategy                                                                                                                | Sample, paragraph 153-160                         |
|                           |         | (e) Describe any sensitivity analyses                                                                                                                                                             | N/A                                               |
| <b>Results</b>            |         |                                                                                                                                                                                                   |                                                   |
| Participants              | 13*     | (a) Report numbers of individuals at each stage of study—eg numbers potentially eligible, examined for eligibility, confirmed eligible, included in the study, completing follow-up, and analysed | General characteristics, paragraph 214-222        |
|                           |         | (b) Give reasons for non-participation at each stage                                                                                                                                              | N/A                                               |
|                           |         | (c) Consider use of a flow diagram                                                                                                                                                                | N/A                                               |
| Descriptive data          | 14*     | (a) Give characteristics of study participants (eg demographic, clinical, social) and information on exposures and potential confounders                                                          | General characteristics, paragraph 214-222        |
|                           |         | (b) Indicate number of participants with missing data for each variable of interest                                                                                                               | Result, paragraph 224-229                         |



|                          |     |                                                                                                                                                                                                              |                               |
|--------------------------|-----|--------------------------------------------------------------------------------------------------------------------------------------------------------------------------------------------------------------|-------------------------------|
| Outcome data             | 15* | Report numbers of outcome events or summary measures                                                                                                                                                         |                               |
| Main results             | 16  | (a) Give unadjusted estimates and, if applicable, confounder-adjusted estimates and their precision (eg, 95% confidence interval). Make clear which confounders were adjusted for and why they were included | Result, paragraph 234-241     |
|                          |     | (b) Report category boundaries when continuous variables were categorized                                                                                                                                    | Result, paragraph 234-241     |
|                          |     | (c) If relevant, consider translating estimates of relative risk into absolute risk for a meaningful time period                                                                                             | N/A                           |
| Other analyses           | 17  | Report other analyses done—eg analyses of subgroups and interactions, and sensitivity analyses                                                                                                               | N/A                           |
| <b>Discussion</b>        |     |                                                                                                                                                                                                              |                               |
| Key results              | 18  | Summarise key results with reference to study objectives                                                                                                                                                     | Discussion, paragraph 251-253 |
| Limitations              | 19  | Discuss limitations of the study, taking into account sources of potential bias or imprecision. Discuss both direction and magnitude of any potential bias                                                   | paragraph 54-60               |
| Interpretation           | 20  | Give a cautious overall interpretation of results considering objectives, limitations, multiplicity of analyses, results from similar studies, and other relevant evidence                                   | Discussion, paragraph 249-342 |
| Generalisability         | 21  | Discuss the generalisability (external validity) of the study results                                                                                                                                        | Conclusion, paragraph 334-350 |
| <b>Other information</b> |     |                                                                                                                                                                                                              |                               |
| Funding                  | 22  | Give the source of funding and the role of the funders for the present study and, if applicable, for the original study on which the present article is based                                                | Funding, paragraph 368-370    |

\*Give information separately for exposed and unexposed groups.

**Note:** An Explanation and Elaboration article discusses each checklist item and gives methodological background and published examples of transparent reporting. The STROBE checklist is best used in conjunction with this article (freely available on the Web sites of PLoS Medicine at <http://www.plosmedicine.org/>, Annals of Internal Medicine at <http://www.annals.org/>, and Epidemiology at <http://www.epidem.com/>). Information on the STROBE Initiative is available at [www.strobe-statement.org](http://www.strobe-statement.org).

# BMJ Open

## Inpatient' s satisfaction with nursing care in a backward region: a cross-sectional study from northwestern China

|                                 |                                                                                                                                                                                                                                                                                                                                                                                                |
|---------------------------------|------------------------------------------------------------------------------------------------------------------------------------------------------------------------------------------------------------------------------------------------------------------------------------------------------------------------------------------------------------------------------------------------|
| Journal:                        | <i>BMJ Open</i>                                                                                                                                                                                                                                                                                                                                                                                |
| Manuscript ID                   | bmjopen-2019-034196.R3                                                                                                                                                                                                                                                                                                                                                                         |
| Article Type:                   | Original research                                                                                                                                                                                                                                                                                                                                                                              |
| Date Submitted by the Author:   | 24-Jul-2020                                                                                                                                                                                                                                                                                                                                                                                    |
| Complete List of Authors:       | Zhang, J ; Gansu Provincial Hospital, Nursing Department<br>Yang, Limei; Gansu Provincial Hospital, In-Patient services Center<br>Wang, Xiaoying; Gansu Provincial Hospital, Anorectal Department<br>Dai, Jiao; Gansu Provincial Hospital, Nursing Department<br>Shan, Wenjing; Gansu Provincial Hospital, Nursing Department<br>Wang, Jiancheng; Gansu provincial Hospital, Elder Department; |
| <b>Primary Subject Heading</b>: | Health services research                                                                                                                                                                                                                                                                                                                                                                       |
| Secondary Subject Heading:      | Epidemiology, Health services research, Nursing                                                                                                                                                                                                                                                                                                                                                |
| Keywords:                       | EPIDEMIOLOGY, SOCIAL MEDICINE, STATISTICS & RESEARCH METHODS                                                                                                                                                                                                                                                                                                                                   |
|                                 |                                                                                                                                                                                                                                                                                                                                                                                                |

SCHOLARONE™  
Manuscripts



I, the Submitting Author has the right to grant and does grant on behalf of all authors of the Work (as defined in the below author licence), an exclusive licence and/or a non-exclusive licence for contributions from authors who are: i) UK Crown employees; ii) where BMJ has agreed a CC-BY licence shall apply, and/or iii) in accordance with the terms applicable for US Federal Government officers or employees acting as part of their official duties; on a worldwide, perpetual, irrevocable, royalty-free basis to BMJ Publishing Group Ltd ("BMJ") its licensees and where the relevant Journal is co-owned by BMJ to the co-owners of the Journal, to publish the Work in this journal and any other BMJ products and to exploit all rights, as set out in our [licence](#).

The Submitting Author accepts and understands that any supply made under these terms is made by BMJ to the Submitting Author unless you are acting as an employee on behalf of your employer or a postgraduate student of an affiliated institution which is paying any applicable article publishing charge ("APC") for Open Access articles. Where the Submitting Author wishes to make the Work available on an Open Access basis (and intends to pay the relevant APC), the terms of reuse of such Open Access shall be governed by a Creative Commons licence – details of these licences and which [Creative Commons](#) licence will apply to this Work are set out in our licence referred to above.

Other than as permitted in any relevant BMJ Author's Self Archiving Policies, I confirm this Work has not been accepted for publication elsewhere, is not being considered for publication elsewhere and does not duplicate material already published. I confirm all authors consent to publication of this Work and authorise the granting of this licence.

1  
2  
3  
4  
5  
6  
7  
8  
9  
10  
11  
12  
13  
14  
15  
16  
17  
18  
19  
20  
21  
22  
23  
24  
25  
26  
27  
28  
29  
30  
31  
32  
33  
34  
35  
36  
37  
38  
39  
40  
41  
42  
43  
44  
45  
46  
47  
48  
49  
50  
51  
52  
53  
54  
55  
56  
57  
58  
59  
60

1 **Inpatient' s satisfaction with nursing care in a backward region: a**  
2 **cross-sectional study from northwestern China**

3 Zhang Juxia RN <sup>1</sup>, Yang Limei RN<sup>2</sup>, Wang Xiaoying RN<sup>3</sup>, Dai Jiao<sup>1</sup>, Shan Wenjing<sup>1</sup>, Wang  
4 Jiancheng Prof. PhD<sup>4\*</sup>

5  
6  
7 1 Nursing Department, Gansu Provincial Hospital, Lanzhou, China

8 Email: juxia2008@hotmail.com

9 2 In-Patient services Center, Gansu Provincial Hospital, Lanzhou, China

10 Email: YangLM@163.com

11 3Anorectal Department, Gansu Provincial Hospital, Lanzhou, China

12 Email: 27385673@qq.com

13 4 Elder Department, Gansu Provincial Hospital, Lanzhou, China

14 Email: 364954672@qq.com

15  
16  
17 \*Corresponding author:

18 Wang Jiancheng, Prof. PhD. Elder Department, Gansu Provincial Hospital, Lanzhou, China

19 Email: 364954672@qq.com

1  
2  
3 **29 Abstract**  
4  
5

6 **30 Objectives** The aim of the study was to examine the level of patient satisfaction with  
7  
8 **31** nursing care and identify the factors affecting satisfaction from the in-patient's  
9  
10  
11 **32** perspective in a backward region of China.  
12

13 **33 Design** This was a cross-sectional study.  
14

15 **34 Setting** The study was conducted at a tertiary hospital located in northwest China.  
16

17 **35 Participants** Patients admitted to the ward for at least 48 hours were chosen to  
18  
19  
20 **36** participate the survey.  
21

22 **37 Primary outcome measure** The Newcastle Satisfaction with Nursing Care Scale was  
23  
24  
25 **38** used. Data were collected from 219 patients.  
26

27 **39 Results** The overall inpatient satisfaction with nursing care was  $78.15 \pm 4.74$ . Patients  
28  
29  
30 **40** were more satisfied with nurses who respected their privacy and treated them as  
31  
32 **41** individuals (67.7%). Patients were least satisfied with the type of information nurses  
33  
34 **42** gave them (11.7%) and with the sufficient awareness of their needs. Patients who  
35  
36 **43** were married, had a history of hospitalization, surgery and were taken charge of by  
37  
38 **44** junior nurses had higher satisfaction.  
39

40  
41 **45 Conclusions** The overall level of patient satisfaction was moderate. Patient centered  
42  
43 **46** individualized care and providing sufficient information model of care are needed.  
44  
45 **47** There was a need for nurses to be aware of patients' individualized care needs and to  
46  
47 **48** provide them with more information. This study may suggesturge hospital  
48  
49 **49** administrators, policy makers and nurses to be more sensitive with patients' married  
50  
51 **50** status, history of hospitalization and surgery, the professional title of in-charged  
52  
53 **51** nurses when care is provided. Ultimatly to achieve better outcome of patients  
54  
55 **52** hospitalization.  
56  
57  
58  
59  
60

1  
2  
3 53 **Keywords:** Inpatient, Nursing care, Satisfaction, Backward region, China  
4  
5  
6  
7  
8  
9  
10  
11

12 54

13 55

14  
15  
16  
17  
18  
19  
20  
21  
22  
23  
24  
25  
26  
27  
28  
29  
30  
31  
32  
33  
34  
35  
36  
37  
38  
39  
40  
41  
42  
43  
44  
45  
46  
47  
48  
49  
50  
51  
52  
53  
54  
55  
56  
57  
58  
59  
60  
61  
62  
63  
64  
65  
66  
67  
68  
69  
70  
71  
72  
73  
74  
75  
60

56 **Strengths and limitations of this study**

57 ● The current study utilized a valid and standardized instrument.

58 ● This is the first study to evaluate inpatients' satisfaction using NSNS in a  
59 backward region of China.

60 ● The small sampling might not likely to represent the patients in all Chinese  
61 hospitals.

62 ● There is a possibility that patient' s responses were influenced by social  
63 desirability.

## 76 **Background**

77 Patient satisfaction has been defined by scholars from different aspects. Swarupa  
78 defines it as people's expectation for health care services due to the requirements of  
79 health, disease, quality of life and other aspects.<sup>1</sup> Berkowitz suggested that patient  
80 satisfaction is an individual's evaluation of the degree to which the medical services  
81 provided are in line with their expectations and preferences.<sup>2</sup> Ahmed believes that  
82 patient satisfaction is the result of patients filtering medical service experience and  
83 evaluating the degree to which medical service experience meets their needs from  
84 their own unique perspective.<sup>3</sup> Among them, most scholars believe that the best  
85 definition of patient satisfaction is an evaluation of medical services by patients based  
86 on the degree to which their expectations are met.<sup>4</sup> In view of this expectation, the  
87 evaluation of patient satisfaction objectively reflects the quality of health care services  
88 which becomes a gold standard and widely used metric to measure hospital quality  
89 management.<sup>5,6</sup>

90 Patient satisfaction with nursing service is an important component of patient  
91 satisfaction.<sup>7</sup> Risser defines patient satisfaction with nursing as the degree to which  
92 the patient's expectation of ideal care is consistent with the actual care.<sup>8</sup> Eriksen  
93 defines it as a subjective evaluation made by patients according to their own  
94 expectations of nursing and their cognitive and emotional reactions to the interaction  
95 of actual receiving nursing services.<sup>9</sup> The American Nurses Association (ANA)  
96 defines it as a patient or his family staff's evaluation of the nursing care received.<sup>10</sup>  
97 The above definitions are slightly different, but the consistent point is that patients'  
98 satisfaction with nursing is a subjective feeling, closely related to their expectation  
99 and perception of nursing quality. From the time of admission until discharge, nurses  
100 provide care for patients every day without fail and are involved in almost every

1  
2  
3 101 aspect of a patient's care. Therefore, as main healthcare providers, nurses make a  
4  
5 102 significant impact upon patients' perceptions about their hospital experience.<sup>7</sup> If  
6  
7 103 healthcare organization managers are able to identify patient expectations, they could  
8  
9 104 accordingly adjust the performance of services that they offer, in order to meet these  
10  
11 105 expectations.<sup>11,12</sup> Therefore, it is urgently necessary to carry out surveys in health  
12  
13 106 services to constantly measure patient health care satisfaction, to learn about their  
14  
15 107 expectations, suggestions and feedbacks, so as to guide health care workers as to  
16  
17 108 which items should be prioritized and which require alterations in the service.<sup>13</sup>

21 109 In order to achieve the goal of high-care quality, decision makers should not only  
22  
23 110 know whether a patient is satisfied but, more importantly, why the patient is not  
24  
25 111 satisfied. That is, they should identify the factors affecting the patient's satisfaction  
26  
27 112 with nursing services, so as to carry out care that meets the patient's needs. According  
28  
29 113 to previous studies, factors such as age,<sup>14,15</sup> gender,<sup>15-17</sup> educational level,<sup>18,19</sup> length  
30  
31 114 of hospital stay, type of admission,<sup>20</sup> previous history of admission, patient's income  
32  
33 115 level, type of admission rooms,<sup>21</sup> monthly household income and frequency of  
34  
35 116 admission, etc. had a significant association with the level of satisfaction.<sup>22</sup> To foster  
36  
37 117 better individualized care, the factors influencing hospitalized a patient's perception  
38  
39 118 of individualized care should be identified.

44 119 In China, there are 20,918 hospitals of different levels with 20 million registered  
45  
46 120 nurses. The average bed to nurse ratio is about 1:0.45. Of them, the 2,232 tertiary  
47  
48 121 public hospitals account for only 7.66% of the all-type health facilities, yet they  
49  
50 122 provide nearly half (42.5%) of the inpatient care.<sup>23</sup> On average, the rate of one nurse  
51  
52 123 per 1,000 population is lower than the WHO standard of 2.28 per 1000 population.<sup>24</sup>  
53  
54 124 Excessive workloads lead to a lower job satisfaction in nurse staff across tertiary  
55  
56 125 hospitals.<sup>23,25</sup> In such an environment, the patient satisfaction in tertiary hospitals  
57  
58  
59  
60



126 needs more attention. The Ministry of Health of China formulated the "Standards for  
 127 Implementing Quality Nursing Services in Hospitals (Trial )" in 2010, which was  
 128 aimed at providing patients with safe and high-quality nursing services.<sup>26</sup> With these  
 129 standards, the "high quality nursing service project" was carried out nation-wide. By  
 130 the end of 2015, all tertiary hospitals in China had carried out the project, with 87.0 %  
 131 of them being tertiary A-class hospitals and 82.6 % were B-class.<sup>27</sup>

132 At present, the results of surveys on the satisfaction of hospitalized patients with  
 133 nursing service in China have rather been confusing. On one hand, patients in  
 134 different facilities reported a high satisfaction about nursing service, as shown in table  
 135 1.

136 Table 1 Outcomes of patients satisfaction in different provinces of China

| Author                       | Survey date | Province                      | Hospital included                                | Instrument    | Satisfaction |       | Effecting factors                                                                  |
|------------------------------|-------------|-------------------------------|--------------------------------------------------|---------------|--------------|-------|------------------------------------------------------------------------------------|
|                              |             |                               |                                                  |               | n            | %     |                                                                                    |
| Guo YH, et al <sup>28</sup>  | 2007        | 24 Provinces                  | 71 Hospitals                                     | Self-designed | 4338         | 93.69 | age, education level                                                               |
| Jiao J, et al <sup>29</sup>  | 2008        | Beijing                       | 4 A-class hospitals                              | NSNS          | 1496         | 82.9  | age, education level health status, department                                     |
| Fu WJ <sup>30</sup>          | 2010        | Henan                         | 1 Children hospital                              | NSNS          | 110          | 85    | age, education level                                                               |
| Nie SM, et al <sup>31</sup>  | 2013        | Shandong                      | 1 B-class hospital                               | Self-designed | 626          | 78    | Department, age, education level, occupation, payment method, ADL                  |
| Shan LH, et al <sup>32</sup> | 2013        | Heilongjiang                  | 30 Hospitals                                     | CNHSSs        | 1200         | 76    | medical insurance                                                                  |
| Hu <sup>33</sup>             | 2013        | Gansu                         | 1 A-class hospital                               | Self-designed | 400          | 80.9  | environment                                                                        |
| Guo M, et al <sup>34</sup>   | 2014        | Shandong                      | 1 A-class hospital                               | Self-designed | 298          | 79.8  | age, patients' position, culture, income and reason for                            |
| Xing Y, et al <sup>35</sup>  | 2015        | Gansu                         | 1 A-class hospital                               | Self-designed | 138          | 82.4  | age, degree of education, average income per person in family, and self-feeling of |
| Liu XJ, et al <sup>36</sup>  | 2017        | Jiangxi                       | 2 A-class hospital                               | IAPSQGH       | 844          | 82.1  | health status, age, degree of education, average income per person in family       |
| Liu JL, et al <sup>37</sup>  | 2019        | 11 provinces in Western China | 33 county-level hospitals, 33 township hospitals | CNHSSs        | 9811         | 60    | waiting time, medical expenses                                                     |

137 CNHSSs: Questionnaires of the China National Health Service Surveys; IAPSQGH: Improvement  
 138 and Assessment of Patient Satisfaction Questionnaire in General Hospitals; ADL: Ability of Daily  
 139 Life; NSNS: Newcastle Satisfaction with Nursing Scale.

1  
2  
3 140 These indicated that Chinese nursing services have continued to be improved with the  
4  
5 141 implementation of the “high-quality care project”. However, untruthful reports by the  
6  
7 142 media and continuous occurrence of disputes and violence are inconsistent with the  
8  
9 143 results of the satisfaction surveys. An analysis of workplace violence shows that 40.8%  
10  
11 144 of hospital nurses in China have experienced different types of workplace violence.<sup>38</sup>  
12  
13 145 Zou et al’s study showed that there was a high incidence (59.7 %) of workplace  
14  
15 146 violence among nurses in Chinese tertiary hospitals.<sup>39</sup> In Wang et al’s study indicated  
16  
17 147 that 6.67% of nurses had suffered violence in the workplace.<sup>40</sup> Violence in these  
18  
19 148 workplaces affects nurses' mental health, leading to job burnout,<sup>41</sup> and thus reduces  
20  
21 149 the quality of nursing services. The frequent occurrence of workplace violence in  
22  
23 150 hospitals directly reflects the dissatisfaction of patients with the quality of medical  
24  
25 151 care. Thus, hospital-specific data are still required to provide evidence for cross-  
26  
27 152 country and cross-cultural comparisons of satisfaction and factors affecting  
28  
29 153 satisfaction using standardized tools.

30  
31 154 The backward region studied in this manuscript is the Gansu province, located in  
32  
33 155 the northwest of China. Affected by the regional conditions, the development of  
34  
35 156 economy, culture and information has been relatively less developed. According to  
36  
37 157 China's comprehensive economic competitiveness development report, Gansu  
38  
39 158 province was ranked 27th among the 31 provinces in China.<sup>42</sup> With continuous  
40  
41 159 development in the overall scale of hospitals in Gansu, the scope of service has been  
42  
43 160 getting larger, and the number of patients received also gradually increasing. With the  
44  
45 161 continuous improvement of people's requirements for service level, complaints from  
46  
47 162 patients occur frequently<sup>43</sup>. In light of this situation, hospital managers urgently need  
48  
49 163 to understand the gap between patients care needs and the capabilities of their hospital  
50  
51 164 to providing care in a timely and dynamic manner. To our knowledge, ours is the first  
52  
53 165 study in Gansu to use the Newcastle Satisfaction with Nursing Scale (NSNS) to  
54  
55 166 measure satisfaction with nursing care. Thus, this study has two aims: (1) to assess  
56  
57 167 patient satisfaction with nursing care using the NSNS instrument, so as to find out the  
58  
59 168 gap between patients' expectations and hospitals’ service provision. (2) to investigate  
60  
169 into the factors affecting patient satisfaction with nursing care, so as to provide more  
170 accurate reference for hospital managers and relevant regulatory agencies.

## 171 **Methods**

### 172 **Study design**

1  
2  
3 173 This study was a cross-sectional survey held in 2018. For the reporting purpose,  
4  
5 174 STROBE (Strengthening the Reporting of Observational Studies in Epidemiology)  
6  
7  
8 175 checklist was used.

### 10 176 **Study settings and the participants**

11  
12 177 This study was conducted at Gansu Provincial Hospital (GPH), a tertiary hospital with  
13  
14 178 1,700 beds. The services at GPH include ear, nose and throat, surgery, outpatients  
15  
16 179 clinic, emergency, gynaecology and obstetrics, paediatrics and neonatal intensive care  
17  
18 180 unit, maternal and child health, physiotherapy, dental, radiology, traditional Chinese  
19  
20 181 medicine, rehabilitation, and internal medicine. GPH is also a teaching hospital for  
21  
22 182 nursing, health officers, medicine, midwifery and pharmacy undergraduate and  
23  
24 183 graduate students. The hospital has a total of 4,070 employees, 1200 of which are  
25  
26 184 nurses who provide health care in 60 nursing units. The hospitalized patients mainly  
27  
28 185 come from residents and people in the surrounding cities and counties. Choosing the  
29  
30 186 hospital to carry out the survey can better understand the expectations of patients from  
31  
32 187 different social strata in Gansu.

33  
34  
35  
36  
37 188 The number of open beds in GPH is about 1,500, excluding departments such as  
38  
39 189 paediatrics, intensive care units, emergency wards and VIP wards (about 200). The  
40  
41 190 population of the study was calculated using the formula  $N = Z^2 \cdot P(1-P)/E^2$ ,<sup>5</sup> in which  
42  
43 191 the symbols represent the following: a margin of error (E)= 5%. In order to narrow  
44  
45 192 the interval and make the estimation of effect quantity more accurate, we chose 99%  
46  
47 193 as the confidence level, with  $Z=2.58$ . 90% patient satisfaction with nursing care.<sup>16</sup> We  
48  
49 194 calculated the sampling using the following:  $Z^2 \cdot P(1-P)/ E^2 = (2.58 \cdot 2.58) \cdot 0.90(1-$   
50  
51 195  $0.90) / (0.05 \cdot 0.05) = 6.65 \cdot 0.09 / 0.0025 = 239$ . Then we added 20% to the sample size  
52  
53 196 for non-response or for selection bias, thus making the sample size = 288  
54  
55  
56  
57 197 approximately. Patients should meet the following inclusion criteria: (1)  $\geq 18$  years old;

1  
2  
3 198 (2) admitted in the wards for at least 48h; (3) capable of independent communication;  
4  
5 199 (3)voluntary participation. Patients were excluded on any one of the following:  
6  
7  
8 200 patients in intensive care unit; pediatric patients; emergency observation ward patients;  
9  
10 201 VIP patients in selected wards. Medical, surgical, gynecological and obstetrical and  
11  
12 202 ear, nose and throat wards were purposefully selected and based on the calculated  
13  
14 203 sample size, the required number of patients from each ward was proportionally  
15  
16 204 allocated. Finally, 291 patients were included for further analysis, and 32 were  
17  
18 205 excluded with 12 of them being younger than 18 years old and 20 who refused to  
19  
20  
21 206 participate.

## 207 **Instruments**

208 The questionnaire included: (1) general demographic characteristics such as age,  
209 gender, educational status, marital status, monthly family income, history of  
210 admission, hospital length of stay, admission ward, professional title of the patient's  
211 nurse in charge. (2) NSNS checklist. The NSNS was developed by Thomas et al.<sup>44</sup>  
212 The scale has been translated into different languages and has been applied in many  
213 studies. The Chinese version of the scale was tested for its validity and reliability by  
214 Jiao with the Cogent Validity index being 0.98 and Cronbach's alpha 0.97.<sup>29</sup> The  
215 NSNS includes two subscales: the Experience of Nursing Care Scale (ENCS) and the  
216 Satisfaction with Nursing Care Scale (SNCS). The two subscales can be applied either  
217 together or separately. In this study, the SNCS was applied, consisting of a total of 19  
218 items and using a 5-point Likert scale. For assessing the degree of satisfaction, 'not at  
219 all', 'barely', 'satisfied', 'very', and 'completely' were scored from 1- 5 respectively.  
220 Patient responses across all items were summed and transformed to yield an overall  
221 satisfaction score between 0–95, which denotes none or complete satisfaction with all  
222 aspects of nursing care.

1  
2  
3 **223 Patient and Public Involvement**  
4

5 **224** The research questions and outcome measures were developed by the authors (ZJX  
6  
7  
8 **225** and WJC) based on the NSNS checklist and through consulting with ward nurse  
9  
10 **226** managers who understood patients' priorities experiences and preferences. Patients  
11  
12 **227** were recruited via their advisers (ward nurse managers) and were interviewed by the  
13  
14 **228** trained nurse students to evaluate their level of satisfaction. No patient was involved  
15  
16  
17 **229** in the design and planning of the study. The main results will be disseminated to  
18  
19 **230** patients by means of health education.  
20

21 **231 Institutional Review Board approval**  
22

23  
24 **232** Consent was acquired from the nurse director (or director nurse?) of each ward and  
25  
26 **233** verbal approvals were obtained from patients. This study was also approved by Gansu  
27  
28 **234** Provincial Hospital Research Ethics Committee.  
29

30  
31 **235 Data collection**  
32

33  
34 **236** Five nursing students were trained previously by one of the authors (ZJX). The  
35  
36  
37 **237** training lasted for two days. On the first day, the students were trained to understand  
38  
39 **238** the meaning of each item of the questionnaire and, on the second, they were shown  
40  
41 **239** how to communicate with patients. After that, each student selected a patient in a  
42  
43 **240** specified department to conduct a pre-survey using the questionnaire, and gave  
44  
45 **241** feedback regarding the survey process, so that the trainers could answer their  
46  
47 **242** questions in a timely manner.  
48

49  
50  
51 **243** At the time of admission, a lottery method was adopted by the nurse manager to  
52  
53 **244** randomly select patients. Then, the students made records and attended to the patients  
54  
55 **245** 48h later after their admission. A private room at the department was used to  
56  
57 **246** interview patients. Family members were present during some of the interviews at the  
58  
59 **247** request of patients. If the patient could not fill in the form due to various factors, the  
60

1  
2  
3 248 student would ask the questions and gave a certain amount of time for patients to  
4  
5 249 make statements for each question. After each question, the student assisted to fill in  
6  
7  
8 250 the questionnaire according to the patient's answer. In addition, medical records were  
9  
10 251 reviewed for certain variables such as hospital length of stay and history of admission.  
11  
12 252 The study started on August 2018 through November of the same year and 291  
13  
14  
15 253 patients completed the survey.

### 17 254 **Data analysis**

18  
19 255 The data were collected and analyzed with SPSS version 21.0. Patient satisfaction was  
20  
21 256 described by the mean, standard deviation, frequency and percentage. As the missing  
22  
23 257 data was less than 5% in some items, we used listwise deletion to deal with them.  
24  
25  
26 258 Considering the study by Ahmed et al,<sup>21</sup> we adopted the same method to use the mean  
27  
28 259 satisfaction score as a cut point to dichotomise satisfaction into 'satisfied' and 'not  
29  
30 260 satisfied'. Based on the years of experience, the professional title of nurses was  
31  
32 261 divided into junior (1-5 years) and senior (above 5 years). In addition to  
33  
34  
35 262 hospitalization, we also checked whether patients had a history of hospitalization in  
36  
37 263 the past. Binary logistics regression analysis and backward stepwise method were  
38  
39 264 used to screen variables that might affect patient satisfaction. The strength of the  
40  
41  
42 265 associations was described using OR and 95% CI.

## 44 266 **Results**

### 48 267 **Patients' characteristics**

49  
50  
51 268 Of the participants, the mean age was  $45.59 \pm 15.96$ . As seen in table 2, 54.6% were  
52  
53 269 male, 87.6% were married and 23.7% were primary school graduates; 33.7% were  
54  
55 270 admitted in a medical department, 43.6% had monthly family incomes between 3,000-  
56  
57 271 4,999 RMB (related to 436-726 USD). More than three-quarters (79%) of the patients  
58  
59  
60

272 knew the name of their nurse in-charge and more than half (61,7%) were cared by  
 273 junior registered nurses. Patients had variations in the duration of their hospital stays  
 274 (2 - 36 days) with a mean of  $7.20 \pm 5.69$  days. The hospital length of stay of inpatients  
 275 in a surgery ward (an average of 11 days) was longer than that for medical inpatients  
 276 (an average of 7 days). See table 2.

277 **Table 2** Socio demographic characteristics and NSNS calculated score for example (N=291)

| Variables                                 | Categories                            | Frequency                    | NSNS score |
|-------------------------------------------|---------------------------------------|------------------------------|------------|
|                                           |                                       | n(%)                         | Mean (SD)  |
| Gender                                    | Male                                  | 159(54.6)                    | 79.00±4.44 |
|                                           | Female                                | 132(45.4)                    | 77.12±4.85 |
| Monthly family income (CNY)*              | <100                                  | 1(0.3)                       | 78.0±0.35  |
|                                           | <1000                                 | 17(5.7)                      | 77.52±4.05 |
|                                           | 1000-2999                             | 103(34.6)                    | 85.0±0.05  |
|                                           | 3000-4999                             | 130(43.6)                    | 78.56±4.37 |
|                                           | ≥5000                                 | 39(13.1)                     | 77.0±6.45  |
|                                           | ≥10000                                | 1(0.3)                       | 78.52±4.05 |
| Marital status                            | Single                                | 20(6.9)                      | 78.5±2.35  |
|                                           | Married                               | 255(87.6)                    | 77.98±4.95 |
|                                           | Others                                | 16(5.5)                      | 80.4±1.59  |
| Educational status                        | Primary school                        | 69(23.7)                     | 78.27±4.01 |
|                                           | High school                           | 146(50.2)                    | 77.90±4.53 |
|                                           | Advanced diploma                      | 40(13.7)                     | 77.82±6.15 |
|                                           | Bachelor's degree                     | 35(12.0)                     | 79.11±4.96 |
|                                           | Master degree                         | 1(0.3)                       | 85.0±0.05  |
| Admission ward                            | Medicine                              | 99(33.7)                     | 78.62±4.93 |
|                                           | Surgery                               | 78(26.5)                     | 77.63±2.97 |
|                                           | Obstetrics and gynecology             | 42(14.4)                     | 74.5±5.5   |
|                                           | Ophthalmology and otorhinolaryngology | 18(6.2)                      | 79.77±3.13 |
|                                           | Rehabilitation department             | 22(7.6)                      | 80.86±5.13 |
| History of admission                      | Yes                                   | 146(50.2)                    | 78.76±4.57 |
|                                           | No                                    | 145(49.8)                    | 77.53±4.82 |
| Patients know the name of nurse in-charge | Yes                                   | 221(75.9)                    | 78.47±4.65 |
|                                           | No                                    | 70(24.1)                     | 77.14±4.82 |
| Living area                               | Urban                                 | 146(50.2)                    | 77.98±4.08 |
|                                           | Rural                                 | 145(49.8)                    | 78.31±5.28 |
| Title of staff nurse                      | Junior RN**                           | 177(61.7)                    | 79.15±4.25 |
|                                           | Senior RN                             | 114(38.3)                    | 76.56±4.98 |
| <b>Mean satisfaction score</b>            |                                       | <b>78.15(Max. 95) ± 4.74</b> |            |

278 NSNS, Newcastle Satisfaction with Nursing Scale.\*USD1 is 7.4 Chinese Yuan (CNY).\*\*RN, Registered Nurse.

## 279 Satisfaction with nursing care

280 As shown in Table 2, the average satisfaction score was  $78.15 \pm 4.74$ . Regarding  
 281 nursing care, as shown in Table 3, patients reported the highest satisfaction when

282 nurses treated them as an individual (67.7%) and respected their privacy (60.8%).  
 283 Patients were least satisfied with the type of information nurses gave them (11.7%)  
 284 and with latter's lack of awareness of the patient's needs (9.6%). As shown in Table 4,  
 285 after dichotomising satisfaction into 'satisfied' and 'not satisfied', 60.5% of the study  
 286 participants were satisfied with the care provided by nurses.

287 **Table 3** Percentage distribution of items for satisfaction with nursing care in admitted patients at GPH.

| Item                                                                                     | Not at all satisfied<br>n (%) | Barely satisfied<br>n (%) | Quite satisfied<br>n (%) | Very satisfied<br>n (%) | Completely satisfied<br>n (%) |
|------------------------------------------------------------------------------------------|-------------------------------|---------------------------|--------------------------|-------------------------|-------------------------------|
| 1. The amount of time nurses spent with patient                                          | 0                             | 4(1.4)                    | 42(14.4)                 | 179(61.5)               | 66(22.7)                      |
| 2. How capable nurses were at their job                                                  | 0                             | 1(0.3)                    | 16(5.5)                  | 156(53.6)               | 118(40.5)                     |
| 3. There always being a nurse around when needed                                         | 0                             | 2(0.7)                    | 58(19.9)                 | 164(56.4)               | 67(23.0)                      |
| 4. The amount nurses knew about patient care                                             | 0                             | 1(0.3)                    | 38(13.1)                 | 193(66.3)               | 59(20.3)                      |
| 5. How quickly nurses came when patient called them                                      | 0                             | 1(0.3)                    | 30(10.3)                 | 123(42.3)               | 137(47.1)                     |
| 6. The way the nurses made patient feel at home                                          | 0                             | 1(0.3)                    | 47(16.2)                 | 187(64.3)               | 56(19.2)                      |
| 7. The amount of information nurses gave to patient about their condition and treatment  | 0                             | 5(1.7)                    | 124(42.6)                | 102(35.1)               | 60(20.6)                      |
| 8. How often nurses checked to see if patients were well                                 | 0                             | 1(0.3)                    | 27(9.3)                  | 176(60.5)               | 87(29.9)                      |
| 9. Nurses' helpfulness                                                                   | 0                             | 1(0.3)                    | 26(8.9)                  | 192(66.0)               | 72(24.7)                      |
| 10. The way nurses explained things to patient                                           | 1(0.3)                        | 0                         | 29(10.0)                 | 166(57.0)               | 95(32.6)                      |
| 11. How nurses helped put patient relatives' or friends' minds at rest                   | 0                             | 0                         | 41(14.1)                 | 161(55.3)               | 89(30.6)                      |
| 12. Nurses' manner in going about their work                                             | 0                             | 0                         | 12(4.4)                  | 111(38.1)               | 167(57.4)                     |
| 13. The type of information nurses gave to patient about his/her condition and treatment | 0                             | 3(1.0)                    | 97(33.3)                 | 157(54)                 | 34(11.7)                      |
| 14. Nurses' treatment of patient as an individual                                        | 0                             | 1(0.3)                    | 14(4.8)                  | 78(26.8)                | 197(67.7)                     |
| 15. How nurses listened to patient worries and concerns                                  | 0                             | 1(0.3)                    | 55(18.9)                 | 196(67.4)               | 39(13.4)                      |
| 16. The amount of freedom patient was given on the ward                                  | 0                             | 0                         | 83(28.5)                 | 170(58.4)               | 38(13.1)                      |
| 17. How willing nurses were to respond to patient requests                               | 0                             | 2(0.7)                    | 51(17.5)                 | 177(60.8)               | 61(21)                        |
| 18. The amount of privacy nurses gave patient                                            | 0                             | 0                         | 36(12.4)                 | 78(26.8)                | 177(60.8)                     |
| 19. Nurses' awareness of patient needs                                                   | 0                             | 3(1.0)                    | 130(44.7)                | 130(44.7)               | 28(9.6)                       |

288 GPH., Gansu Provincial Hospital

### 289 **Factors influencing satisfaction**

290 Previous history of hospitalization and surgery were significant factors influencing  
 291 patient satisfaction with nursing care. A higher level of patient satisfaction was found  
 292 in married patients with a history of admission ( $P < 0.05$ ). Patients admitted in medical  
 293 wards showed the highest satisfaction compared to those in other wards. The score  
 294 without surgery was higher than that with surgery ( $p = 0.045$ ,  $OR = 0.64$ ,  $95\% CI = 0.38$ -  
 295  $1.07$ ). The higher the nurse's professional title, the lower the score. The patient who



296 did not know the nurse in-charge had a lower score ( $p=0.028, OR=1.77, 95\% CI=0.98-$   
 297 3.19) (Table 5).

298 **Table 4** Level of inpatients satisfaction with nursing services in a tertiary hospital of Gansu, China

| Variables                                      | Level of satisfaction                 |                                       |
|------------------------------------------------|---------------------------------------|---------------------------------------|
|                                                | Satisfied<br>(score $\geq 78$ ), N(%) | Dissatisfied<br>(score $< 78$ ), N(%) |
| <b>Gender</b>                                  |                                       |                                       |
| Male                                           | 105(59.66)                            | 54(46.05)                             |
| Female                                         | 71(40.34)                             | 61(53.04)                             |
| <b>Marital status</b>                          |                                       |                                       |
| Single                                         | 12(6.82)                              | 8(6.96)                               |
| Married                                        | 158(89.77)                            | 97(84.35)                             |
| Others                                         | 16(9.09)                              | 0                                     |
| <b>Admission ward</b>                          |                                       |                                       |
| Medicine                                       | 69(39.20)                             | 29(25.22)                             |
| Surgery                                        | 41(23.29)                             | 36(31.30)                             |
| Obstetrics and gynecology                      | 11(6.25)                              | 31(26.96)                             |
| Ophthalmology and<br>Rehabilitation department | 13(7.39)                              | 5(4.35)                               |
|                                                | 16(9.09)                              | 6(5.22)                               |
| <b>History of admission</b>                    |                                       |                                       |
| Yes                                            | 95(53.98)                             | 51(44.33)                             |
| No                                             | 81(46.02)                             | 64(55.65)                             |
| <b>History of surgery</b>                      |                                       |                                       |
| Yes                                            | 81(43.02)                             | 66(57.39)                             |
| No                                             | 95(53.98)                             | 49(42.61)                             |
| <b>Know the nurse in charge</b>                |                                       |                                       |
| Yes                                            | 140(79.55)                            | 81(70.43)                             |
| No                                             | 36(20.45)                             | 34(29.56)                             |
| <b>Title of nurse in charge</b>                |                                       |                                       |
| junior                                         | 121(68.75)                            | 56(48.69)                             |
| senior                                         | 55(31.25)                             | 59(51.30)                             |
| <b>Educational status</b>                      |                                       |                                       |
| Primary school                                 | 43(24.43)                             | 26(22.61)                             |
| High school                                    | 87(49.43)                             | 59(51.30)                             |
| Advanced diploma                               | 22(12.50)                             | 18(15.65)                             |
| Bachelor's degree                              | 23(13.07)                             | 12(10.43)                             |
| Master degree                                  | 1(0.57)                               | 0                                     |
| <b>Total</b>                                   | 176(60.50)                            | 115(39.50)                            |

299

300 **Table 5** Factors influencing patients' satisfaction with nursing care.

| Variables                | B     | S.E  | Sig.  | 95%CI     |
|--------------------------|-------|------|-------|-----------|
| Gender                   | 0.15  | 0.32 | 0.640 | 0.61,2.19 |
| Marital status           | -1.08 | 0.51 | 0.037 | 0.13,0.93 |
| Admission ward           | -0.02 | 0.12 | 0.839 | 0.76,1.24 |
| History of admission     | 0.29  | 0.38 | 0.045 | 0.67,2.29 |
| History of surgery       | -0.60 | 0.29 | 0.049 | 0.30,0.98 |
| Know the nurse in charge | 0.79  | 0.34 | 0.021 | 1.13,4.35 |
| Title of nurse in charge | 0.99  | 0.30 | 0.001 | 1.49,4.89 |

|     |                    |       |      |       |           |
|-----|--------------------|-------|------|-------|-----------|
| 301 | Educational status | -0.13 | 0.19 | 0.486 | 0.59,1.27 |
|-----|--------------------|-------|------|-------|-----------|

## 302 Discussion

303 Patients' satisfaction with hospital care are significantly associated with better patient  
 304 safety, clinical effectiveness,<sup>45</sup> health outcomes<sup>46</sup> and less medical resource  
 305 utilization.<sup>47</sup> In the current reform of China's health-care system, we need to have a  
 306 better understanding of what is associated with patient satisfaction, and what we can  
 307 do to improve it. Comparably no study on patient satisfaction in northwest of China  
 308 has been reported in English. The international research community has limited access  
 309 to and understanding of patient satisfaction in this area. In this study, we use NSNS to  
 310 investigate the level of inpatients satisfaction with nursing care and its associated  
 311 factors in northwestern China. The results showed that the patient's overall  
 312 satisfaction in nursing was 78.15+4.74 (95 points are completely satisfied), and 60.5%  
 313 of inpatients were satisfied with nursing services at GPH. Marital status, history of  
 314 admission, history of surgery, knowing the nurse in-charge and title of nurse in-charge  
 315 were all significantly associated with patient satisfaction.

316 The level of patient satisfaction (60.5%) in our study was higher than the results  
 317 obtained in other areas either in China or elsewhere, such as in Taiwan (35%)<sup>48</sup>  
 318 Malaysia<sup>22</sup> and 11 western provinces in China (60%);<sup>37</sup> however, it was lower than  
 319 that in Shandong,<sup>31</sup> Jiangxi<sup>36</sup> and other cities in Gansu, China,<sup>33,35</sup> and also in Spain<sup>49</sup>  
 320 and Australia.<sup>50</sup> This might have been related to differences in sample size, region  
 321 and the use of a different survey scale. Therefore it is difficult to make an absolute  
 322 comparison of these results. When the research findings were compared with studies  
 323 conducted using the same scale internationally, the average score was higher than  
 324 Turkey (62.08+20.94),<sup>5</sup> Ethiopia (63.9+17),<sup>21</sup> Poland (74.98),<sup>15</sup> Jordan  
 325 (77.1+12.52)<sup>51</sup> and Pakistan(51%),<sup>52</sup> but lower than studies conducted in Beijing<sup>29</sup>  
 326 and Henan province<sup>30</sup> in China. A study from rural western China showed that  
 327 patients in primary health care were relatively less satisfied with medical services than  
 328 developed areas.<sup>53</sup> Our study may have indicated this too.

329 Although the overall patient satisfaction was moderate, this study revealed that  
 330 patients were mostly satisfied with nurses' attitude in treating them as an individual  
 331 and respected their privacy. However, the fewest patients in the study were satisfied  
 332 with the type of information nurses gave them (11.7%) and a lack of awareness in

1  
2  
3 333 their needs (9.6%). The findings were consistent with the outcomes of other  
4 334 studies.<sup>54,55,56,57</sup> It could be that, first of all, due to their heavy workload, nurses spent  
5 335 more time on completing doctor's orders and therapeutic work, less time is spent on  
6 336 communicating with patients and conducting health education. This might also result  
7 337 from the fact that in most Chinese hospitals there are no nurse assistants whose main  
8 338 tasks are the performance of basic nursing activities such as bathing, oral toilet,  
9 339 changing, etc.<sup>58</sup> Nurse staff in different professional layers need to perform various  
10 340 direct and indirect nursing activities. Moreover, hospitals in a less developed area may  
11 341 face a larger proportion of patients with a lower education level.<sup>53</sup> They may have  
12 342 more demands of medical knowledge. However, with such a workload, nurses were  
13 343 eager to educate patients and therefore provide incomplete information that could not  
14 344 meet patients' needs.<sup>59</sup> In various clinical settings, information is the decisive factor  
15 345 for good patient experience.<sup>60</sup> Poor communication between health care professionals  
16 346 and their patients is a key problem in the growing number of complaints against  
17 347 health care professionals worldwide.<sup>61</sup> Therefore, investigating all aspects of patients'  
18 348 needs and providing them with care and information to meet their needs through  
19 349 communication plays an important role in improving patients' satisfaction.<sup>62</sup>

20  
21  
22  
23  
24  
25  
26  
27  
28  
29  
30  
31  
32  
33 350 A better understanding of the factors affecting care quality can help hospital  
34 351 managers implement effective plans to improve service quality.<sup>63</sup> In the current study,  
35 352 we find that married patients were more satisfied than others. This finding was in  
36 353 accord with a study conducted in Amhara Region<sup>64</sup> which used the NSNS scale, and  
37 354 another study in China<sup>26</sup> which used another scale. This could be that married patients  
38 355 were accompanied by their spouses who provided daily care and communicated with  
39 356 them. Therefore, they had relatively less demand from nurses. Prevalence of  
40 357 preoperative anxiety ranged between 60–80% in population,<sup>65</sup> which had been  
41 358 commonly neglected by clinicians.<sup>66</sup> Study has shown that patients who were well-  
42 359 informed and understood the process had a better surgical experience.<sup>49</sup> However,  
43 360 this might have not been well revealed in our study as patients with surgery showed  
44 361 less satisfied with nursing services. It is suggested that patients need to be assessed  
45 362 regularly for anxiety during the preoperative visit and appropriate anxiety reducing  
46 363 methods should be introduced. Nursing staff should attach importance to nurse-patient  
47 364 communication through assessing patient needs to provide health related information  
48 365 and care services so as to meet patients' needs,<sup>62</sup> thus enhancing their satisfaction.

1  
2  
3 366 Another factor that needs to be emphasized is that patients with a history of  
4  
5 367 hospitalization were found to be more satisfied than their counterparts, and similar  
6  
7 368 results were found in other studies conducted in Ethiopia<sup>67</sup> and China.<sup>26</sup> This could be  
8  
9 369 because patients who are hospitalized for first time are unfamiliar with the nursing  
10  
11 370 staff and hospital environment. They may have more needs for communication with  
12  
13 371 nurses regarding their diseases and nursing services. For those with a previous history  
14  
15 372 of admission, they have a certain understanding of their own diseases and health  
16  
17 373 conditions, and are familiar with the hospital environment and ward nurses, and have  
18  
19 374 a stronger sense of security than patients hospitalized for the first time. Our findings  
20  
21 375 also showed that patients who knew their nurse in-charge were significantly satisfied  
22  
23 376 with nursing than those who did not. Study showed patients receiving continuity of  
24  
25 377 care with the same nurse were more satisfied than those who did not.<sup>41</sup> The findings  
26  
27 378 can provide evidence for the value of nurses in nursing practice. Patients require more  
28  
29 379 individualized care from nurses regarding education, communication and comfort<sup>2</sup>,  
30  
31 380 which will improve their well-being through reducing anxiety and depression, and  
32  
33 381 also indirectly, through building trust and social support.<sup>68</sup>

32  
33 382 Research shows that nurses' work experience is closely related to patient  
34  
35 383 satisfaction. So it is helpful to provide guidance for rational allocation of nursing  
36  
37 384 human resources to explore whether the composition of professional titles affect  
38  
39 385 patient satisfaction. Tarja's research shows that the working years of nurses are  
40  
41 386 positively correlated with patient satisfaction.<sup>69</sup> In China, the level of nurses is  
42  
43 387 divided into professional titles corresponding to junior (1-5), intermediate (5-10) and  
44  
45 388 senior (more than 10 years). The more nurses with a solid professional knowledge and  
46  
47 389 rich working experience among nursing staff, the better the effect of nursing work.<sup>26</sup>  
48  
49 390 Research by Wang shows that patients' satisfaction with nursing professional skills is  
50  
51 391 positively correlated with the proportion of nurses working for more than 5 years, and  
52  
53 392 satisfaction with health education is positively correlated with the proportion of  
54  
55 393 competent nurses.<sup>40</sup> Han's survey shows that patients are most satisfied with nurses  
56  
57 394 who have worked for 2-5 years.<sup>70</sup> Our findings also showed the same as the patients in  
58  
59 395 the charge of junior nurses who have worked for less than 5 years were more satisfied  
60  
396 than those in the charge of senior nurses. The reason may be that nurses who have  
397  
398 worked for more than 5 years have rich clinical experience and better operating skills,  
399  
400 but most of them have a sense of job burnout, which has a negative impact on patient  
401  
402 satisfaction.<sup>70</sup> On the other hand, due to the different divisions of labor in GPH, nurses

1  
2  
3 400 working for less than 5 years are mainly engaged in first-line clinical nursing, while  
4  
5 401 senior nurses in some work related to ward organization and management. Therefore,  
6  
7 402 senior nurses have less communication with patients, thus affecting patients'  
8  
9 403 satisfaction with their work. It indicated that nurse-patient communication plays an  
10  
11 404 important role in the evaluation of patients' satisfaction with nursing work.

12 405 This study has several strengths: the use of a standardised patient satisfaction scale  
13  
14 406 and the first to evaluate patients' satisfaction using the scale in a less developed area  
15  
16 407 of China. However, certain limitations should be noted too. First, the present study was  
17  
18 408 conducted in one hospital context, which might limit the external validity of the  
19  
20 409 results in other healthcare contexts. Future research should therefore investigate  
21  
22 410 whether the questionnaire has the ability to demonstrate significant differences across  
23  
24 411 hospitals in terms of their caring culture. Second, potentially relevant factors  
25  
26 412 influencing patient satisfaction such as medical diagnosis, severity and duration of  
27  
28 413 illness, and medication history were not included. Third, the study adopted self-  
29  
30 414 reported questionnaires, so all answers were based on admitted patients, who might be  
31  
32 415 afraid to speak out their real feelings that they thought might affect further nursing  
33  
34 416 care they received.

## 33 417 **Conclusion**

35  
36  
37 418 The current study explored the level of patient satisfaction with nursing services and  
38  
39 419 its associated factors in a backward region of China. It shows that the care needs of  
40  
41 420 hospitalized patients are yet not satisfied to some extent. Meanwhile, patients'  
42  
43 421 married status, history of hospitalization and surgery, professional title of nurses in  
44  
45 422 charge when providing care are main factors effecting patients satisfaction. The  
46  
47 423 current finding will have direct implication for nurse professionals and nursing  
48  
49 424 administrators. Nurses should establish a good relationship with patients through  
50  
51 425 more communication. In daily nursing work, nurses should formulate corresponding  
52  
53 426 plans according to the personal characteristics and care needs of patients so as to  
54  
55 427 sufficiently meet patients' expectations.  
56  
57  
58  
59  
60

1  
2  
3 428 Of course, besides nursing, many factors may also affect the patient's satisfaction,  
4  
5 429 including patient staffing ratio, the use of health information technology, the amount  
6  
7 430 of surgery in the hospital and the health teaching situation. Based on our experience,  
8  
9 431 we suggest to conduct interviews with patient as a first step to learn what patients are  
10  
11 432 most concerned with when seeking nursing services.  
12  
13  
14

15 433

16 434

17 435

18 436

19 437

20 438

21 439

22 440

23 441

24 442

25 443

26 444

27 445

28 446

29 447

30 448

31 449

32 450

33 451

34 452

35 453

1  
2  
3 454  
4  
5 455  
6  
7 456

## 8 **Declarations**

9  
10  
11 457 **Ethics approval:** This study was approved by Gansu Provincial Hospital's Ethic  
12  
13 458 Commission.

14  
15  
16 459 **Consent for publication:** Not applicable.

17  
18  
19  
20 460 **Availability of data and material :** The data sets used and/or analysed during the  
21  
22  
23 461 current study are available from the corresponding author on a reasonable request.

24  
25  
26 462 **Competing interests:** The authors declare that they have no competing interests

27  
28  
29  
30 463 **Funding:** This study is funded by Gansu provincial hospital fund (17GSSY1-5). The  
31  
32 464 funding has no role in in the design of the study and collection, analysis, and  
33  
34 465 interpretation of data and in writing the manuscript.

35  
36  
37  
38 466 **Authors' contributions:** YLM and WXY performed the survey. WJC analyzed and  
39  
40 467 interpreted the patient data regarding satisfaction and effective factors. ZJX was a  
41  
42 468 major contributor in writing the manuscript. DJ and SWJ were involved in  
43  
44 469 supervision during data collection and data entry. All authors read and approved the  
45  
46 470 final manuscript.

47  
48  
49  
50  
51 471 **Acknowledgements:** We would like to acknowledge the contribution of those patient  
52  
53 472 advisers (ward nurse managers) who facilitated patient recruitment and two students  
54  
55 473 (Wang Linna, Li Li, Gai Xiaojie, Pei Yun and Pei Xiaoyue) who collected the data.  
56  
57 474 We also appreciate the help of the patients who participated in this study. We thank  
58  
59  
60

1  
2  
3 475 Mei Chunyuan(Clinical Nurse; RN. Wesley Hospital, Australia) and Kevin Miao  
4  
5 476 (School of Foreign Languages and Literatures, Lanzhou University, China) for their  
6  
7 477 hard work in improving the quality of the English throughout the manuscript.  
8  
9  
10 478  
11  
12 479  
13  
14 480  
15  
16 481  
17  
18 482  
19  
20 483  
21  
22 484  
23  
24 485  
25  
26 486  
27  
28 487  
29  
30 488  
31  
32 489  
33  
34 490  
35  
36 491  
37  
38 492  
39  
40 493  
41  
42 494  
43  
44 495  
45  
46 496  
47  
48 497  
49  
50 498  
51  
52 499  
53  
54 500  
55  
56 501  
57  
58 502  
59  
60 503  
511 504  
511 505  
511 506  
511 507  
511 508  
511 509  
511 510  
511 511



512

513 **References**

- 514 1. Swarupa I, Hennb CM, Gulotta LV, et al. Patient expectations and satisfaction in orthopaedic  
515 surgery: A review of the literature. *Journal of Clinical Orthopaedics and Trauma* 2019;10(4):  
516 755–60.
- 517 2. Berkowitz B. The Patient Experience and Patient Satisfaction: Measurement of a Complex  
518 Dynamic. *Online J Issues Nurs* 2016;21(1):1.
- 519 3. Ahmed S, Miller J, Burrows JF, et al. Evaluation of patient satisfaction in Pediatric  
520 dermatology. *Pediatr Dermatol* 2017;34(6):668-72.
- 521 4. Blank FS, Tobin J, Jaouen M, et al. A comparison of patient and nurse expectations regarding  
522 nursing care in the emergency department. *J Emerg Nurs* 2014;40(4):317-22.
- 523 5. Kol E, Arıkan F, İlaslan E, et al. A quality indicator for the evaluation of nursing  
524 care: determination of patient satisfaction and related factors at a university hospital in the  
525 Mediterranean Region in Turkey. *Collegian* 2018;25:51–56.
- 526 6. Al-Abri R, Al-Balushi A. Patient satisfaction survey as a tool towards quality improvement.  
527 *Oman Med J* 2014;29(1):3-7.
- 528 7. Seeber R. The kind peace of mind culture" improves patient satisfaction. *Rehabil Nurs* 2012;  
529 37(6):286-91.
- 530 8. Risser NL. Development of an instrument to measure patient satisfaction with nurse and  
531 nursing care in primary care settings. *Nursing Research* 1975;24:45-52.
- 532 9. Eriksen LR. Patient satisfaction with nursing care: concept satisfaction. *Journal of Nursing*  
533 *Measurement* 1995;3:59-76.
- 534 10. American Nurses Association. Quality Indicators for Acute Care Settings. *Healthcare*  
535 *Benchmarks* 1999;12:138-139.
- 536 11. Davins J, Gens M, Pareja C, et al. El modelo de acreditación de atención primaria de Catalunya:  
537 un modelo válido. *Med Clin (Barc)* 2014;143:74–80.
- 538 12. ANCC. American Nurses Credentialing Center. Magnet Recognition Program Model,  
539 <https://www.nursingworld.org/organizational-programs/magnet/> (2017, accessed 17 February  
540 2018).
- 541 13. Karaca A, Durna Z. Patient satisfaction with the quality of nursing care. *Nurs Open* 2019;  
542 6(2):535–545.
- 543 14. Land L, uhonen R. Orthopaedic and trauma patients' perceptions of individualized care. *Int*  
544 *Nurs Rev* 2009;56(1):131–7.
- 545 15. Gutysz-Wojnicka A, Dyk D, Cudak E, et al. Measuring patient satisfaction with the polish  
546 version of the Newcastle satisfaction with nursing scale. *Scand J Caring Sci* 2013;27(2):311–8.
- 547 16. Rose PM. Patients' characteristics informing practice: improving individualized nursing care in  
548 the radiation oncology setting. *Support Care Cancer* 2018;26(10):3609-18.

- 1  
2  
3 549 17. Alasad J, Abu Tabar N, AbuRuz ME. Patient Satisfaction With Nursing Care: Measuring  
4 550 Outcomes in an International Setting. *J Nurs Adm* 2015;45(11):563-8.
- 5 551 18. Köberich S, Feuchtinger J, Farin E. Factors influencing hospitalized patients'  
6 552 perception of individualized nursing care: a cross-sectional study. *BMC Nursing* 2016;15:14.
- 7 553 19. Atallah MA, Hamdan-Mansour AM, Al-Sayed MM, et al. Patients' satisfaction with the quality  
8 554 of nursing care provided: the Saudi experience. *Int J Nurs Pract* 2013;19(6):584-90. 20.  
9 555 Suhonen R, Land L, Valimäki M, et al. Impact of patient characteristics on orthopaedic and  
10 556 trauma patients' perceptions of individualised nursing care. *Int J Evid Based Healthc* 2010;8(4):  
11 557 259-67.
- 12 558 21. Ahmed T, Assefa N, Demisie A, et al. Levels of Adult Patients' Satisfaction with Nursing Care  
13 559 in Selected Public Hospitals in Ethiopia. *International Journal of Health Sciences*  
14 560 2014;8(4):371-379.
- 15 561 22. Zun AB, Ibrahim MI, Hamid AA. Level of Satisfaction on Service Quality Dimensions Based  
16 562 on SERVQUAL Model Among Patients Attending Malaysia Clinic in Kota Bharu, Malaysia.  
17 563 *Oman Med J* 2018;33(5):416-422.
- 18 564 23. Duan M, Li D, Dong X. Analysis of job satisfaction among medical staff of public hospitals in  
19 565 Xingjiang. *J Xinjiang Med Univ* 2015;38:635-637.
- 20 566 24. Ministry of Health (MoH). China Health Statistical Yearbook; Press of Peking Union Medical  
21 567 College: Beijing, China, 2017.
- 22 568 25. Wang S, Rui J, Ke X, et al. Job satisfaction survey among 580 medical staff in public hospitals in  
23 569 a city. *Hei Long Jiang Med J* 2015;37:510-514.
- 24 570 26. Ministry of Health (MoH). Ministry of Health Releases Quality Care Service Standards to  
25 571 Strengthen Hospital Clinical Care. [http://www.china.com.cn/policy/txt/2010-](http://www.china.com.cn/policy/txt/2010-12/23/content_21604283.htm)  
26 572 [12/23/content\\_21604283.htm](http://www.china.com.cn/policy/txt/2010-12/23/content_21604283.htm).
- 27 573 27. The National Nursing Development Plan (2016-2020), National Health Commission of the  
28 574 People's Republic of China, 2016.
- 29 575 28. Guo YH, Jiao J, Zheng XJ, et al. A survey of inpatient satisfaction with nursing care in 24  
30 576 districts of China (Chinese). *Chinese Journal of Nursing* 2008;43(4):293-298.
- 31 577 29. Jiao J. Inpatient satisfaction with nursing care and its influencing factors in 3-A-Grade general  
32 578 hospitals in Beijing (Chinese). Beijing Xiehe Medical University, thesis, 2009.
- 33 579 30. Fu WJ. Study of effects of family-centered care on quality of life in parents of children with  
34 580 cerebral palsy. Zhenzhou University, thesis, 2012.
- 35 581 31. Nie SM. Study on inpatient satisfaction with nursing and influencing factors in some second A  
36 582 hospitals (Chinese). Master thesis, Shandong University, 2014.
- 37 583 32. Shan LH, Li Y, Ding D, et al. Patient Satisfaction with Hospital Inpatient Care: Effects of  
38 584 Trust, Medical Insurance and Perceived Quality of Care. *PLoS ONE* 2016;11(10):e0164366.
- 39 585 33. Hu L. Investigation on Satisfaction of Inpatients in a Hospital in Qingyang City, Gansu  
40 586 Province, China. *Western traditional Chinese medicine* 2014;11:87-90.

- 1  
2  
3 587 34. Guo M.A Survey on Inpatient Satisfaction and Influence Factors Analysis in a Tertiary  
4 588 Hospital,Master thesis,Dalian Medical University. 2015.
- 5  
6 589 35. Xing Y,Tang R,Du HF,et al.Satisfactory Degree of Inpatients in Some Hospitasl in Northwest  
7 590 Region to Nursing Services.*Chinese health industry* 2016;06(c):67-70.
- 8  
9 591 36. Liu XJ,Lu H,Wang Y,et al.Factors affecting patient satisfaction with ecdemic medical care: a  
10 592 cross-sectional study in nanchang, china. *Patient Preference and Adherence* 2018;12:1373–82.
- 11  
12 593 37. Liu JL,MaoY.Patient Satisfaction with Rural Medical Services:A Cross-Sectional Survey in 11  
13 594 Western Provinces in China.*Int. J. Environ. Res. Public Health* 2019;16:3968.
- 14  
15 595 38. Fang PP,Ye Q,Li YX,et al.Analysis on Workplace Violence in Hospital from Nurses'  
16 596 Perspective and Countermeasure(Chinese).*Chinese Health Service Management* 2016;33(4):  
17 597 255-258.
- 18  
19 598 39. Zou QH.Research on the Current Situation and Risk Factors of Workplace Violence of Nurses  
20 599 in Level C Hospitals -Taking 3 Level C Hospitals as Examples(Chinese).Beijing University of  
21 600 Chinese Medicine,Master thesis, 2018.
- 22  
23 601 40. Wang C,Sun CH.Impacts of capability for work,mental health,and coping style of nurses on  
24 602 hospital workplace violence(Chinese).*Chinese Journal of Public health* 2015;23(7):941-45.
- 25  
26 603 41. Zhang D,Lu D,Shi Y,et al.Impact of Patients Violence in Public Hospital on Job Burnout of  
27 604 Nurses(Chinese).*Chinese Journal of Hospital Administration* 2016;36(9):69-71.
- 28  
29  
30  
31 605 42. National Economic Ranking of Provinces in China, 2018. Beijing Youth Daily.2019-02-  
32 606 11.[http://www.sohu.com/a/307360333\\_120060910](http://www.sohu.com/a/307360333_120060910).
- 33  
34  
35 607 43. Xing Y,Tang R,Du HF,et al.Satisfactory Degree of Inpatients in Some Hospitasl in Northwest  
36 608 Region to Nursing Services.*Chinese health industry* 2016;06(c):67-70.
- 37  
38  
39 609 44.ThomasLH,McCull E,Priest J,et al.Newcastle satisfaction with scales:an instrument for quality  
40 610 assessments of nursing care. *Quality in Health Care* 1996;5(2):67–72.
- 41  
42  
43 611 45.Tsai TC,Orav EJ,Jha AK.Patient satisfaction and quality of surgical care in US hospitals.*Ann*  
44 612 *Surg* 2015;261(1):2-8.
- 45  
46 613 46. Doyle C,Lennox L,Bell D.A systematic review of evidence on the links between patient  
47 614 experience and clinical safety and effectiveness.*BMJ Open* 2013;3(1):e001570.
- 48  
49 615 47. Tobis S,Wieczorowska-Tobis K,Talarska D,et al.Needs of older adults living in long-term care  
50 616 institutions: an observational study using Camberwell Assessment of Need for the Elderly.  
51 617 *Clinical Interventions in Aging* 2018,13:2389–95.
- 52  
53  
54 618 48. Khan M,Hassan R,Anwar S,et al.Patient Satisfaction with Nursing Care.*Rawal Medical*  
55 619 *Journal* 2007;32(1):28-30.
- 56  
57  
58 620 49. Sillero A,Zabalegui A.Satisfaction of surgical patients with perioperative nursing care in a  
59 621 Spanish tertiary care hospital.*SAGE Open Med* 2018;6:2050312118818304.
- 60

- 1  
2  
3 622 50. Desborough J, Phillips C, Banfield M, et al. Impact of nursing care in Australian general practice  
4 623 on the quality of care: A pilot of the Patient Enablement and Satisfaction Survey  
5 624 (PESS). *Collegian* 2015;22(2):207-214.
- 6  
7 625 51. Jafar A, Alasad M, Muayyad M, et al. Patients' satisfaction with nursing care in Jordan.  
8 626 *International Journal of Health Care Quality Assurance* 2003;16:279-285.
- 9  
10 627 52. Younas A, Sundus A. Patients' experiences and satisfaction about care provided by male nurses  
11 628 in medical surgical units in Islamabad, Pakistan: A pilot study. *Nurs Forum* 2018;53(1):12-19.
- 12  
13  
14 629 53. Xin He, Lingui Li, Ying Bian. Satisfaction survey among primary health care outpatients in the  
15 630 backward region: an empirical study from rural Western China. *Patient Preference and*  
16 631 *Adherence* 2018;12:1989-96.
- 17  
18  
19 632 54. Lee TL, Crouse M, Gipson K. No-Pass Zone: Multidisciplinary Approach to Responding  
20 633 to Patient Needs. *J Nurs Care Qual* 2016;31(4):327-34.
- 21  
22 634 55. Milutinovic D, Simin D, Brkic N, et al. The patient satisfaction with nursing care quality: the  
23 635 psychometric study of the Serbian version of PSNCQ questionnaire. *Scand J Caring Sci* 2012;  
24 636 26(3):598-606.
- 25  
26 637 56. Belayneh M. Inpatient satisfaction and associated factors towards nursing care at Felegehiwot  
27 638 Referral Hospital, Northwest Ethiopia: Amhara Regional State. Retrieved October, 2016. from  
28 639 <http://www.gjmedph.com/uploads/O7-Vo5No3.pdf>.
- 29  
30 640 57. Chan B, Goldman LE, Sarkar U, et al. The Effect of a Care Transition Intervention on the Patient  
31 641 Experience of Older Multi-Lingual Adults in the Safety Net: Results of a Randomized  
32 642 Controlled Trial. *J Gen Intern Med* 2015;30(12):1788-94.
- 33  
34 643 58. Nski MW, Ksykiewicz-Dorota A, Fidecki WB. Scope of Nursing Care in Polish Intensive Care  
35 644 Units. *BioMed Research International* 2013;4:1-9.
- 36  
37 645 59. Adugbire I A, Aziato L. Surgical patients' perspectives on nurses' education on post-operative  
38 646 care and follow up in Northern Ghana. *BMC Nursing* 2018;17:29.
- 39  
40 647 60. Patient Information Forum. Making the case for information: the evidence for investing in  
41 648 high quality information for patients and the public. Patient Information Forum,  
42 649 2013. <https://www.pifonline.org.uk/wp-content/uploads/2013/05/PiF-full-report-FINAL-new.pdf>.  
43 650 Accessed 21 July 2016.
- 44  
45 651 61. Amutio-Kareaga A, García-Campayo J, Delgado LC, et al. Improving Communication between  
46 652 Physicians and Their Patients through Mindfulness and Compassion-Based Strategies: A  
47 653 Narrative Review. *J Clin Med* 2017;6(3): 33.
- 48  
49 654 62. Jiang S. The Relationship between Face-to-Face and Online Patient-Provider Communication:  
50 655 Examining the Moderating Roles of Patient Trust and Patient Satisfaction. *Health Commun*  
51 656 2019;1: 1-9.
- 52  
53 657 63. Liu Y, Aunguroch Y. Factors influencing nurse-assessed quality nursing care: A cross-sectional  
54 658 study in hospitals. *J Adv Nurs* 2018;74(4): 935-45.
- 55  
56  
57  
58  
59  
60

- 1  
2  
3 659 64. Kasa AS,Gedamu H.Predictors of adult patient satisfaction with nursing care in public  
4 660 hospitals of Amhara region,Northwest Ethiopia.*BMC Health Serv Res* 2019;19:52.  
5  
6 661 65. Woldegerima YB,Fitwi GL,Yimer HT,et al.Prevalence and factors associated with preoperative  
7 662 anxiety among elective surgical patients at University of Gondar Hospital.Gondar,Northwest  
8 663 Ethiopia,A cross-sectional study.*International Journal of Surgery Open* 2018;10:21-29.  
9  
10 664 66. Pereira L,Figueiredo-Braga M,Carvalho IP.Preoperative anxiety in ambulatory surgery: The  
11 665 impact of an empathic patient-centered approach on psychological and clinical outcomes.  
12 666 *Patient Educ Couns* 2016;99(5):733-8.  
13  
14 667 67. Sharew NT,Bizuneh HT,Assefa HK,et al.Investigating admitted patients' satisfaction with  
15 668 nursing care at DebreBerhan Referral Hospital in Ethiopia: a cross-sectional study.*BMJ*  
16 669 *Open* 2018;8(5):e021107.  
17  
18 670 68. Greenhalgh J,Gooding K,Gibbons E,et al.How do patient reported outcome measures (PROMs)  
19 671 support clinician-patient communication and patient care? A realist synthesis.*J Patient Rep*  
20 672 *Outcomes* 2018;2:42.  
21  
22 673 69.Tarja TH,Tarja K,PiIjo P.Patient Satisfaction as a Positive Nursing Outcome.*Journal of*  
23 674 *Nursing Care Quality* 2007;23(1):58-65.  
24  
25 675 70. Han CH,Connolly PM,Canham D.Measuring patient satisfaction as an outcome of nursing care  
26 676 at a teaching hospital of southern Taiwan.*J Nurs Care Qual* 2003;18(2):143-50.  
27  
28  
29  
30  
31 677

STROBE Statement—Checklist of items that should be included in reports of *cross-sectional studies*

|                           | Item No | Recommendation                                                                                                                                                                                    |                                                   |
|---------------------------|---------|---------------------------------------------------------------------------------------------------------------------------------------------------------------------------------------------------|---------------------------------------------------|
| <b>Title and abstract</b> | 1       | (a) Indicate the study's design with a commonly used term in the title or the abstract<br>(b) Provide in the abstract an informative and balanced summary of what was done and what was found     | Title, paragraph 1-2<br>Abstract, paragraph 30-50 |
| <b>Introduction</b>       |         |                                                                                                                                                                                                   |                                                   |
| Background/rationale      | 2       | Explain the scientific background and rationale for the investigation being reported                                                                                                              | Background, paragraph 79-131                      |
| Objectives                | 3       | State specific objectives, including any prespecified hypotheses                                                                                                                                  | Background, paragraph 132-133                     |
| <b>Methods</b>            |         |                                                                                                                                                                                                   |                                                   |
| Study design              | 4       | Present key elements of study design early in the paper                                                                                                                                           | Study design, paragraph 150                       |
| Setting                   | 5       | Describe the setting, locations, and relevant dates, including periods of recruitment, exposure, follow-up, and data collection                                                                   | Setting, paragraph 136-138                        |
| Participants              | 6       | (a) Give the eligibility criteria, and the sources and methods of selection of participants                                                                                                       | sample, paragraph 153-171                         |
| Variables                 | 7       | Clearly define all outcomes, exposures, predictors, potential confounders, and effect modifiers. Give diagnostic criteria, if applicable                                                          | paragraph 177-186                                 |
| Data sources/measurement  | 8*      | For each variable of interest, give sources of data and details of methods of assessment (measurement). Describe comparability of assessment methods if there is more than one group              | paragraph 192-201                                 |
| Bias                      | 9       | Describe any efforts to address potential sources of bias                                                                                                                                         | paragraph 165-171                                 |
| Study size                | 10      | Explain how the study size was arrived at                                                                                                                                                         | Sample, paragraph 153-160                         |
| Quantitative variables    | 11      | Explain how quantitative variables were handled in the analyses. If applicable, describe which groupings were chosen and why                                                                      | Data Analysis, paragraph 158-161                  |
| Statistical methods       | 12      | (a) Describe all statistical methods, including those used to control for confounding                                                                                                             | Data Analysis, paragraph 203                      |
|                           |         | (b) Describe any methods used to examine subgroups and interactions                                                                                                                               | Data Analysis, paragraph 204-209                  |
|                           |         | (c) Explain how missing data were addressed                                                                                                                                                       | N/A                                               |
|                           |         | (d) If applicable, describe analytical methods taking account of sampling strategy                                                                                                                | Sample, paragraph 153-160                         |
|                           |         | (e) Describe any sensitivity analyses                                                                                                                                                             | N/A                                               |
| <b>Results</b>            |         |                                                                                                                                                                                                   |                                                   |
| Participants              | 13*     | (a) Report numbers of individuals at each stage of study—eg numbers potentially eligible, examined for eligibility, confirmed eligible, included in the study, completing follow-up, and analysed | General characteristics, paragraph 214-222        |
|                           |         | (b) Give reasons for non-participation at each stage                                                                                                                                              | N/A                                               |
|                           |         | (c) Consider use of a flow diagram                                                                                                                                                                | N/A                                               |
| Descriptive data          | 14*     | (a) Give characteristics of study participants (eg demographic, clinical, social) and information on exposures and potential confounders                                                          | General characteristics, paragraph 214-222        |
|                           |         | (b) Indicate number of participants with missing data for each variable of interest                                                                                                               | Result, paragraph 224-229                         |

|                          |     |                                                                                                                                                                                                              |                               |
|--------------------------|-----|--------------------------------------------------------------------------------------------------------------------------------------------------------------------------------------------------------------|-------------------------------|
| Outcome data             | 15* | Report numbers of outcome events or summary measures                                                                                                                                                         |                               |
| Main results             | 16  | (a) Give unadjusted estimates and, if applicable, confounder-adjusted estimates and their precision (eg, 95% confidence interval). Make clear which confounders were adjusted for and why they were included | Result, paragraph 234-241     |
|                          |     | (b) Report category boundaries when continuous variables were categorized                                                                                                                                    | Result, paragraph 234-241     |
|                          |     | (c) If relevant, consider translating estimates of relative risk into absolute risk for a meaningful time period                                                                                             | N/A                           |
| Other analyses           | 17  | Report other analyses done—eg analyses of subgroups and interactions, and sensitivity analyses                                                                                                               | N/A                           |
| <b>Discussion</b>        |     |                                                                                                                                                                                                              |                               |
| Key results              | 18  | Summarise key results with reference to study objectives                                                                                                                                                     | Discussion, paragraph 251-253 |
| Limitations              | 19  | Discuss limitations of the study, taking into account sources of potential bias or imprecision. Discuss both direction and magnitude of any potential bias                                                   | paragraph 54-60               |
| Interpretation           | 20  | Give a cautious overall interpretation of results considering objectives, limitations, multiplicity of analyses, results from similar studies, and other relevant evidence                                   | Discussion, paragraph 249-342 |
| Generalisability         | 21  | Discuss the generalisability (external validity) of the study results                                                                                                                                        | Conclusion, paragraph 334-350 |
| <b>Other information</b> |     |                                                                                                                                                                                                              |                               |
| Funding                  | 22  | Give the source of funding and the role of the funders for the present study and, if applicable, for the original study on which the present article is based                                                | Funding, paragraph 368-370    |

\*Give information separately for exposed and unexposed groups.

**Note:** An Explanation and Elaboration article discusses each checklist item and gives methodological background and published examples of transparent reporting. The STROBE checklist is best used in conjunction with this article (freely available on the Web sites of PLoS Medicine at <http://www.plosmedicine.org/>, Annals of Internal Medicine at <http://www.annals.org/>, and Epidemiology at <http://www.epidem.com/>). Information on the STROBE Initiative is available at [www.strobe-statement.org](http://www.strobe-statement.org).
